# Supplementary material
Source: PubMed Central journal article supplement (PMC7050110)

AIVDKVPSV

CLL replicate 1

unlabeled

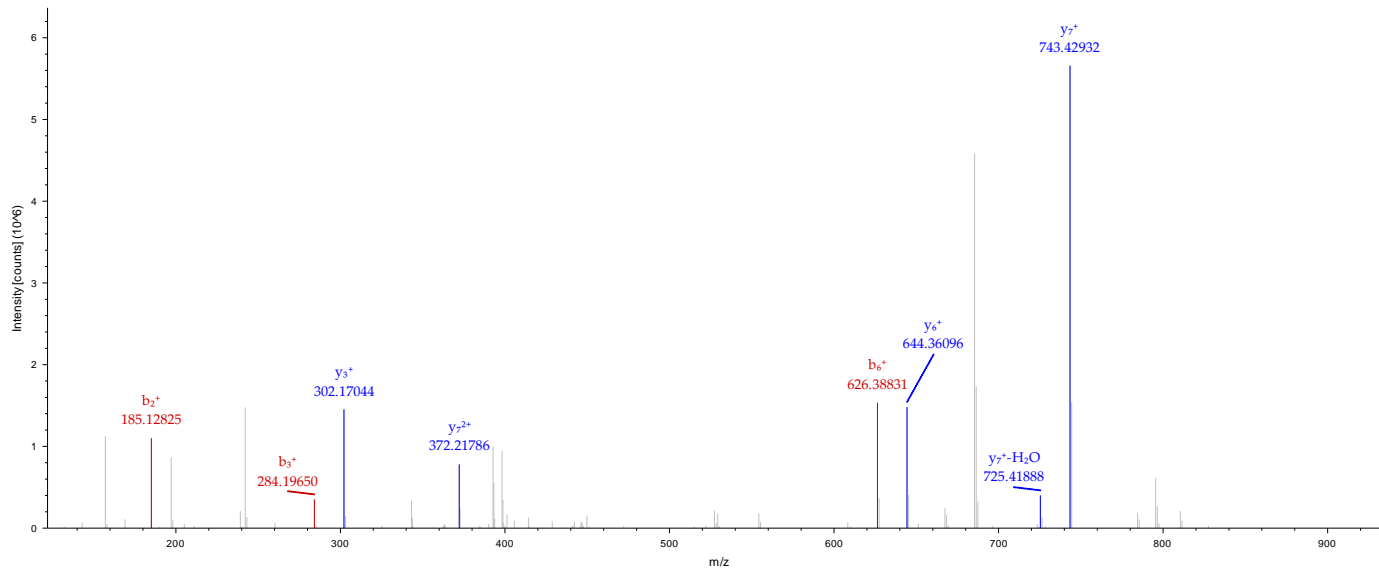

YLLPAIVHI

unlabeled

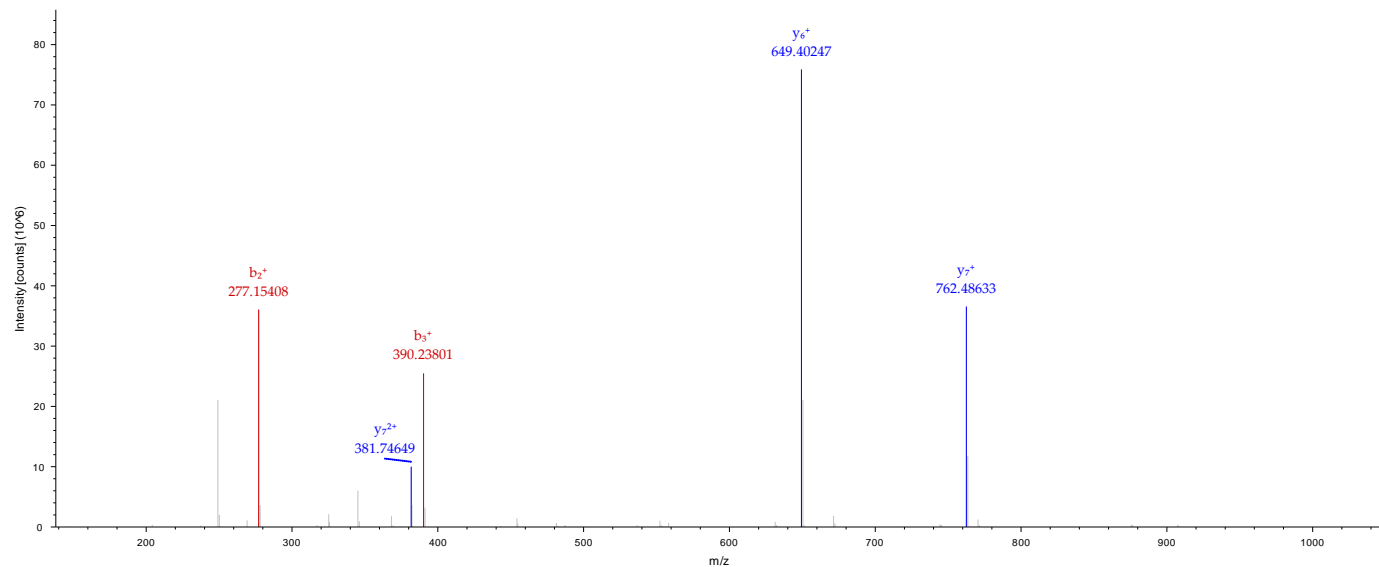

AIVDKVPVS

# CLL replicate 2

unlabeled

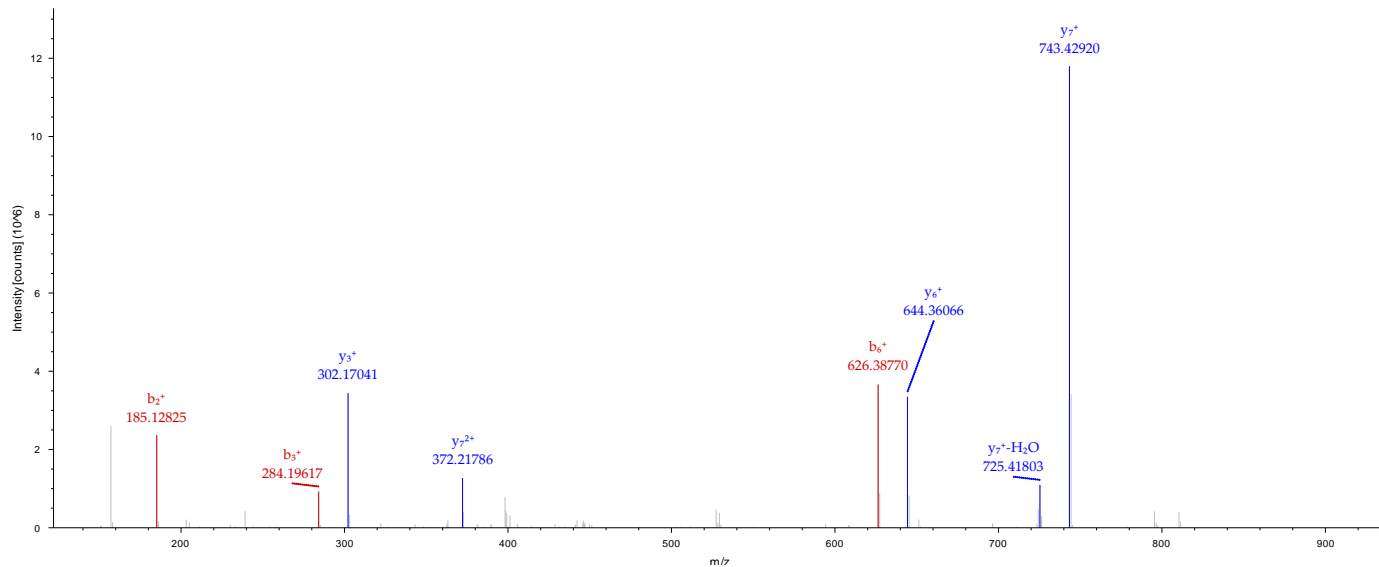

YLLPAIVHI

unlabeled

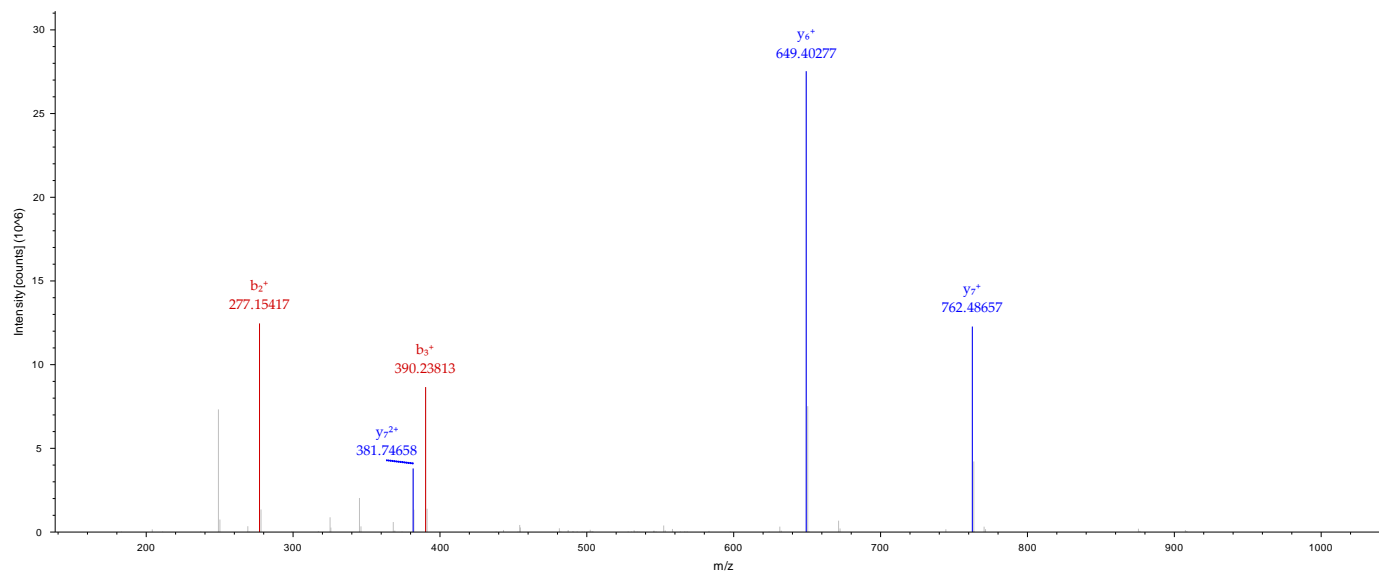

AIVDKVPVSV

# CLL replicate 3

unlabeled

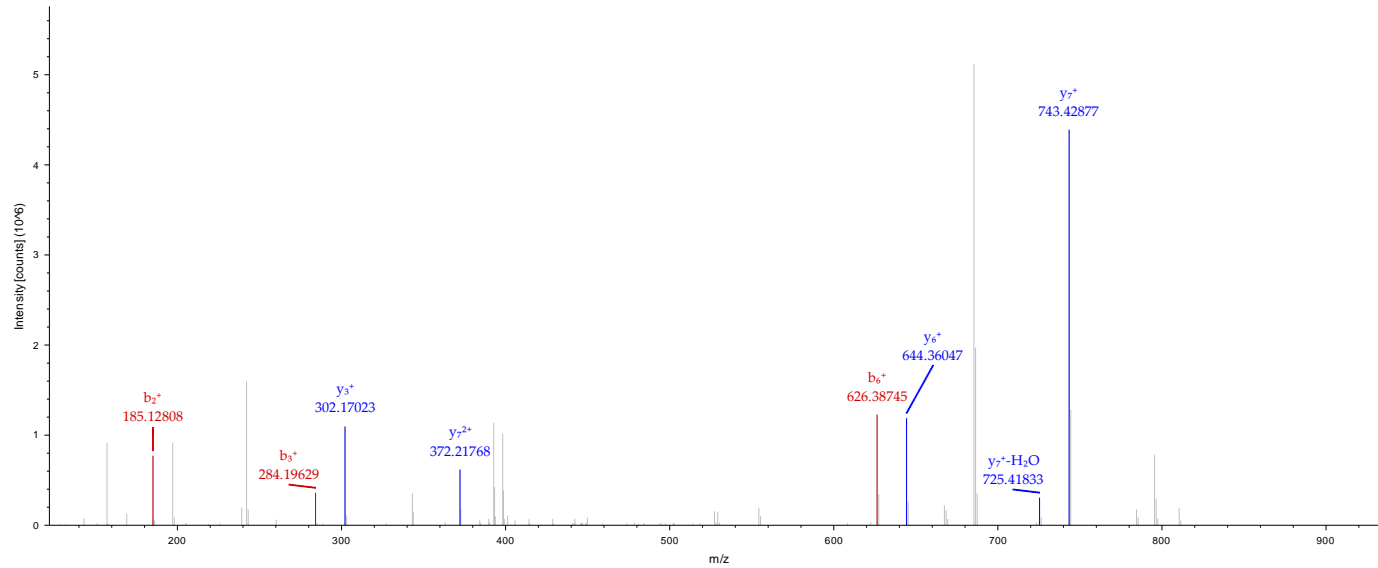

YLLPAIVHI

unlabeled

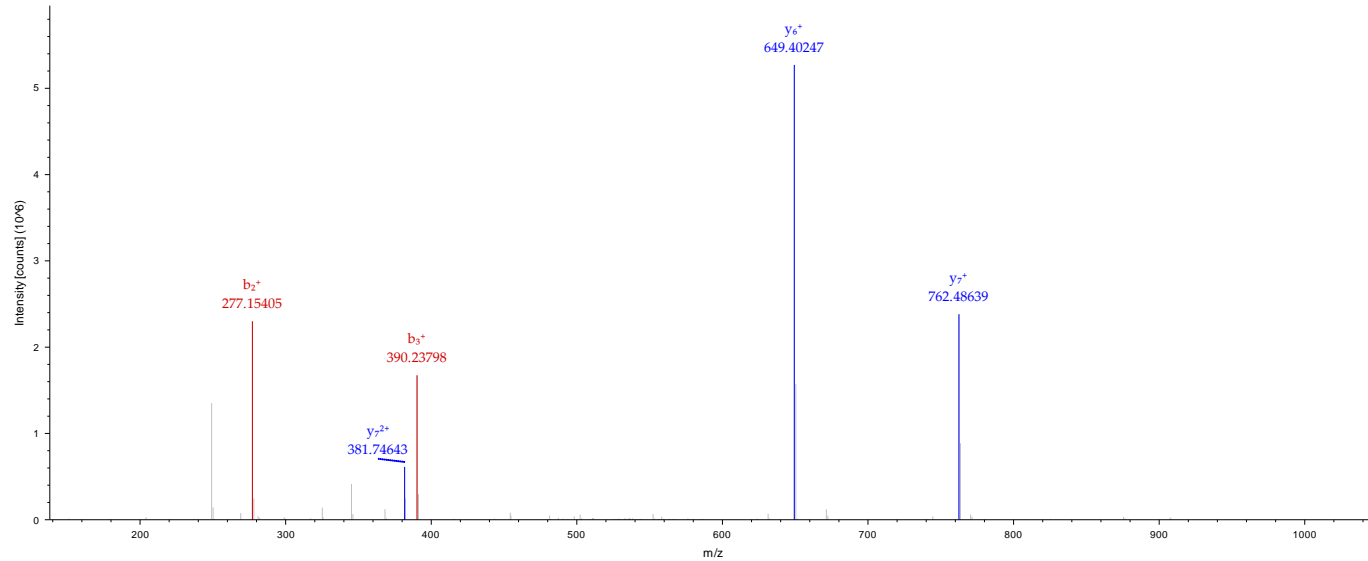

AIVDKVPSV

PBMC replicate 1

unlabeled

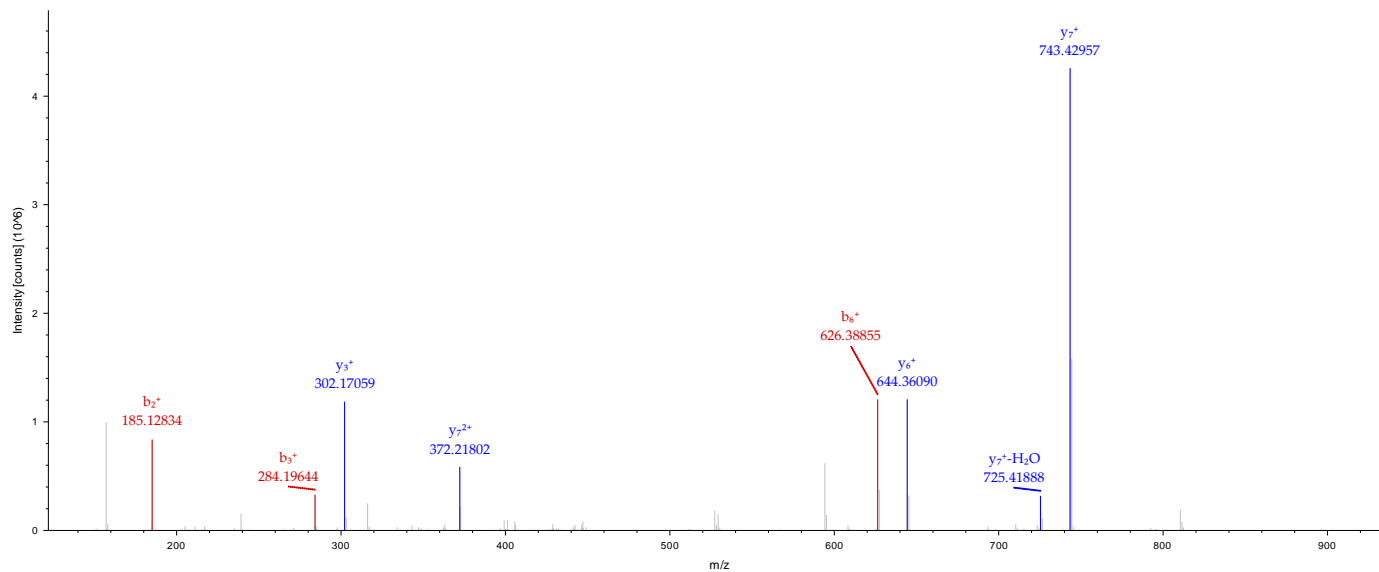

YLLPAIVHI

unlabeled

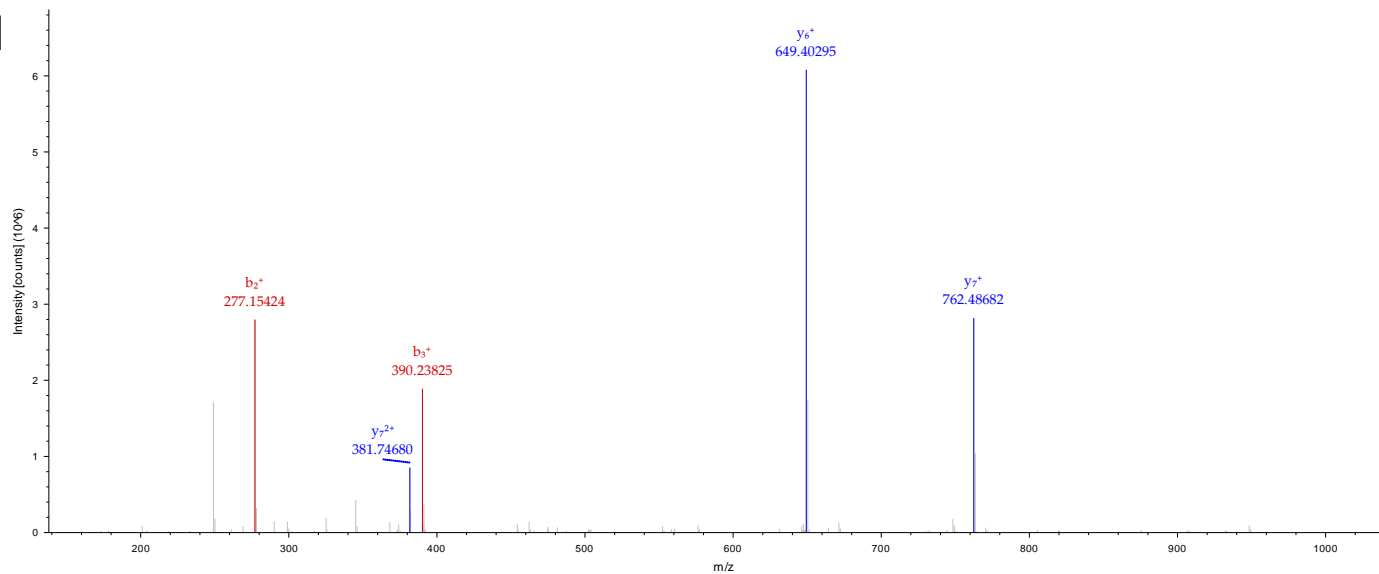

AIVDKVPSV

PBMC replicate 2

unlabeled

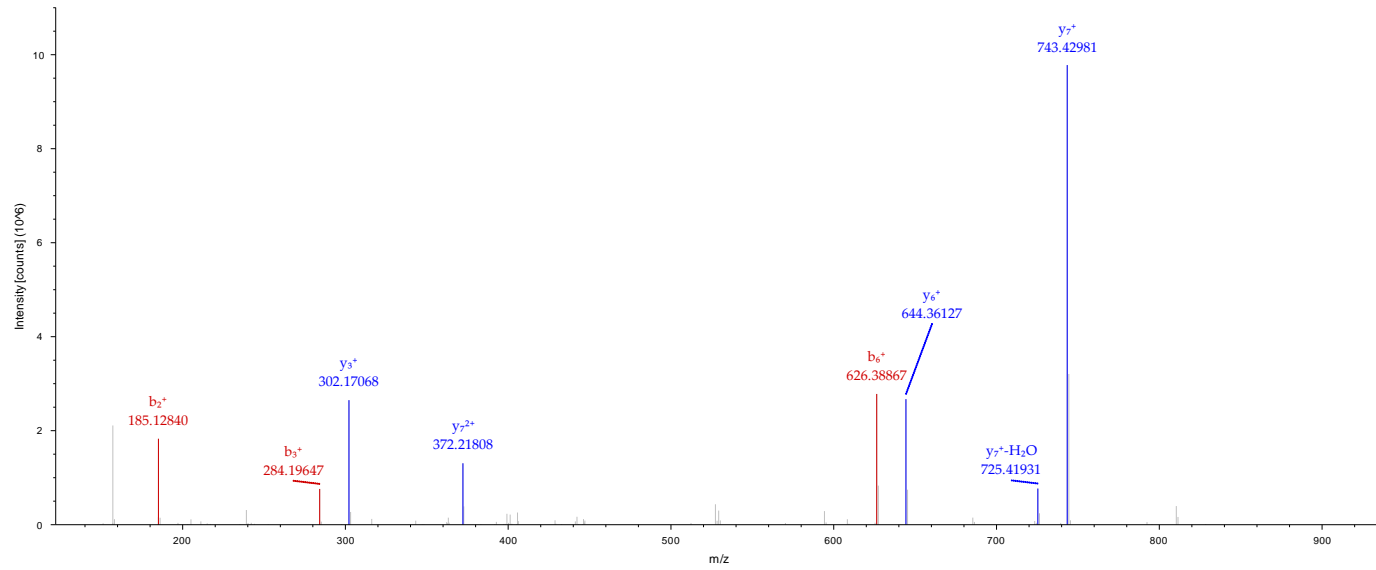

YLLPAIVHI

unlabeled

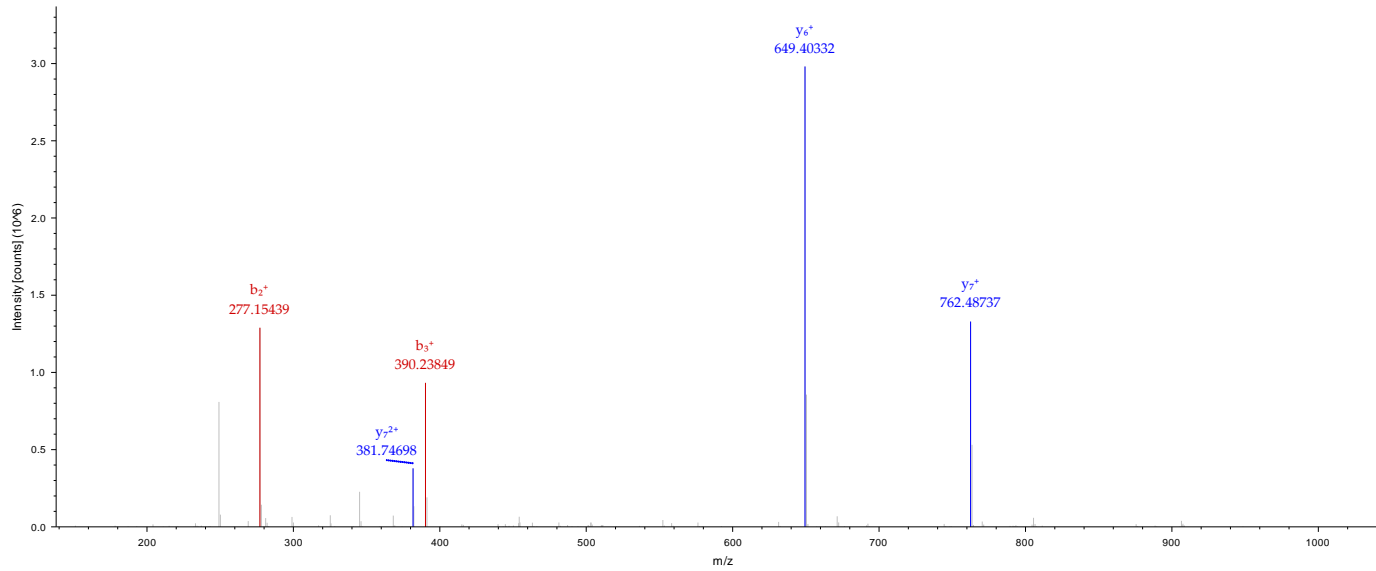

AIVDKVPSV

PBMC replicate 3

unlabeled

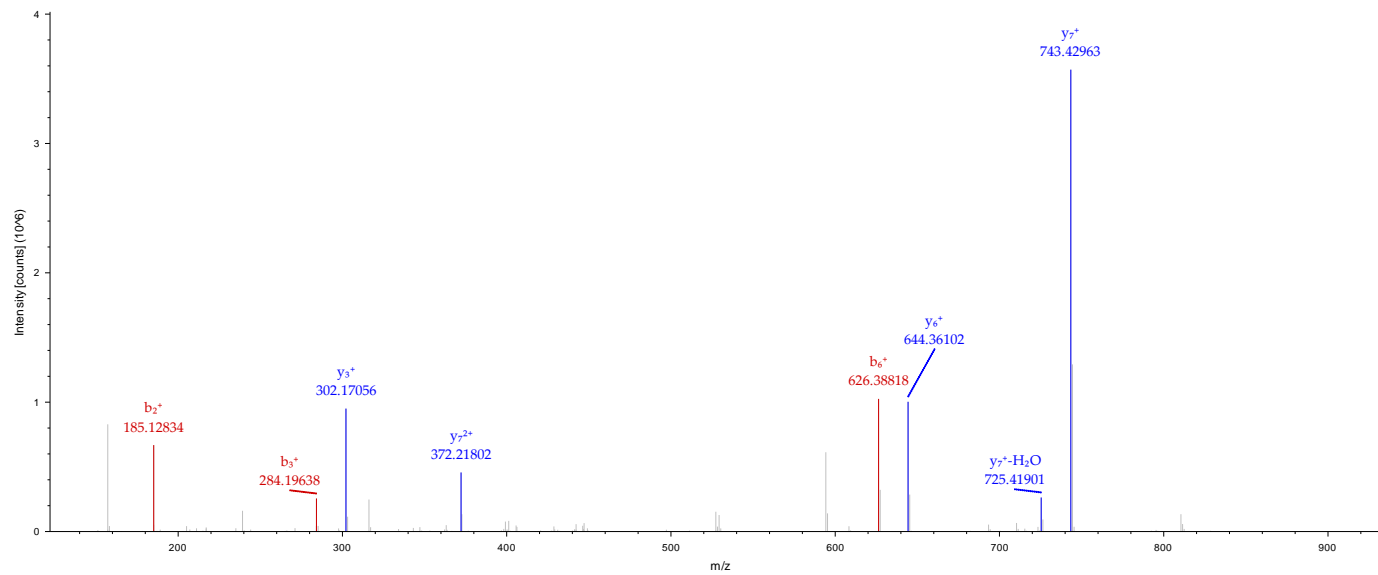

YLLPAIVHI

unlabeled

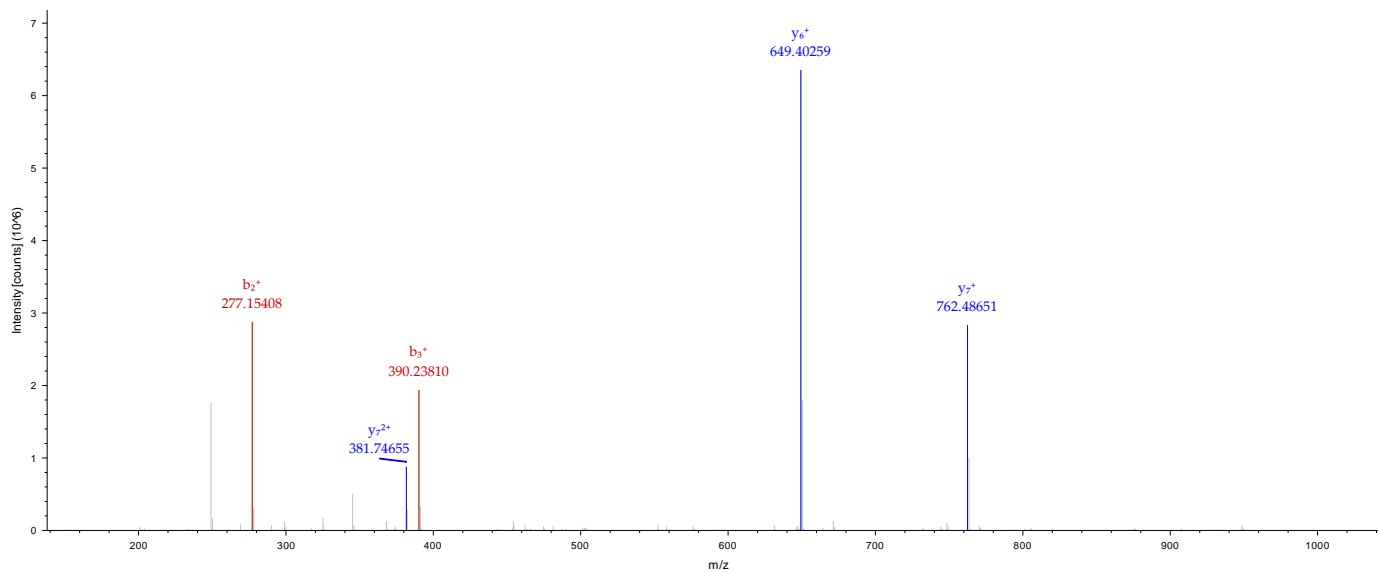

GT<sup>1</sup>YVSSVPR

CLL replicate 1

unlabeled

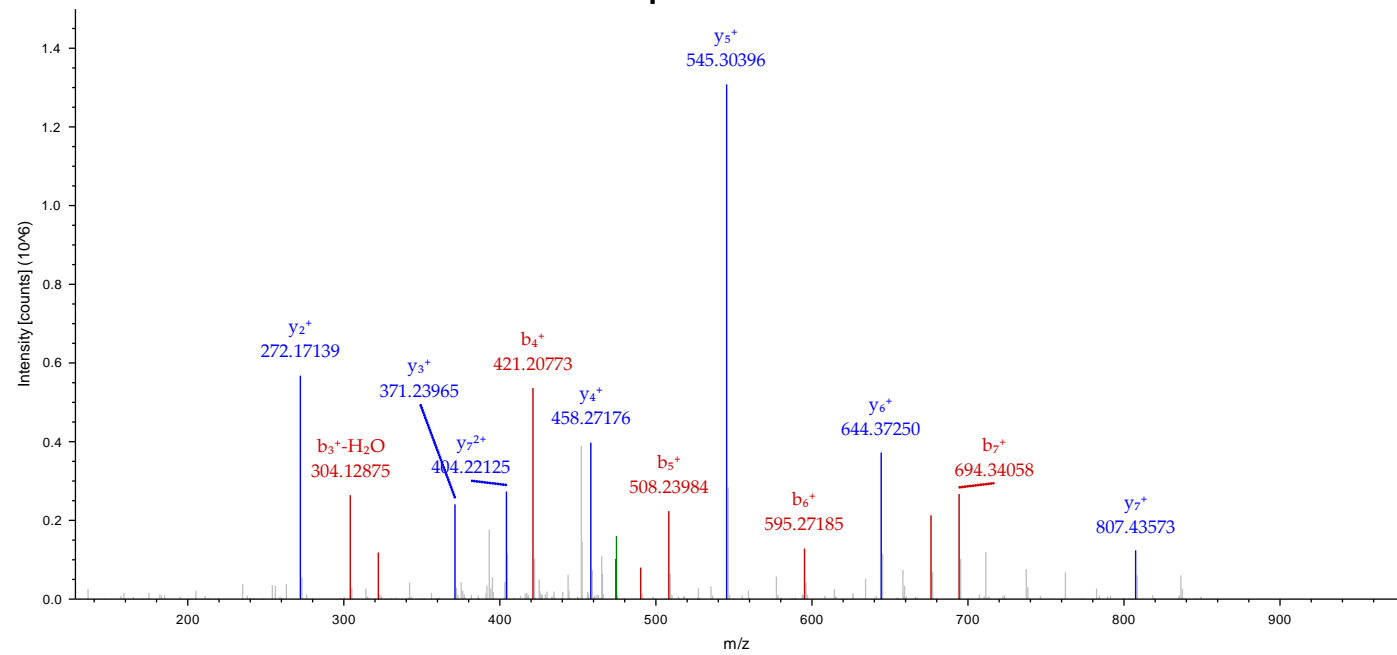

GT<sup>1</sup>YVSSVPR

JY replicate 1

labeled

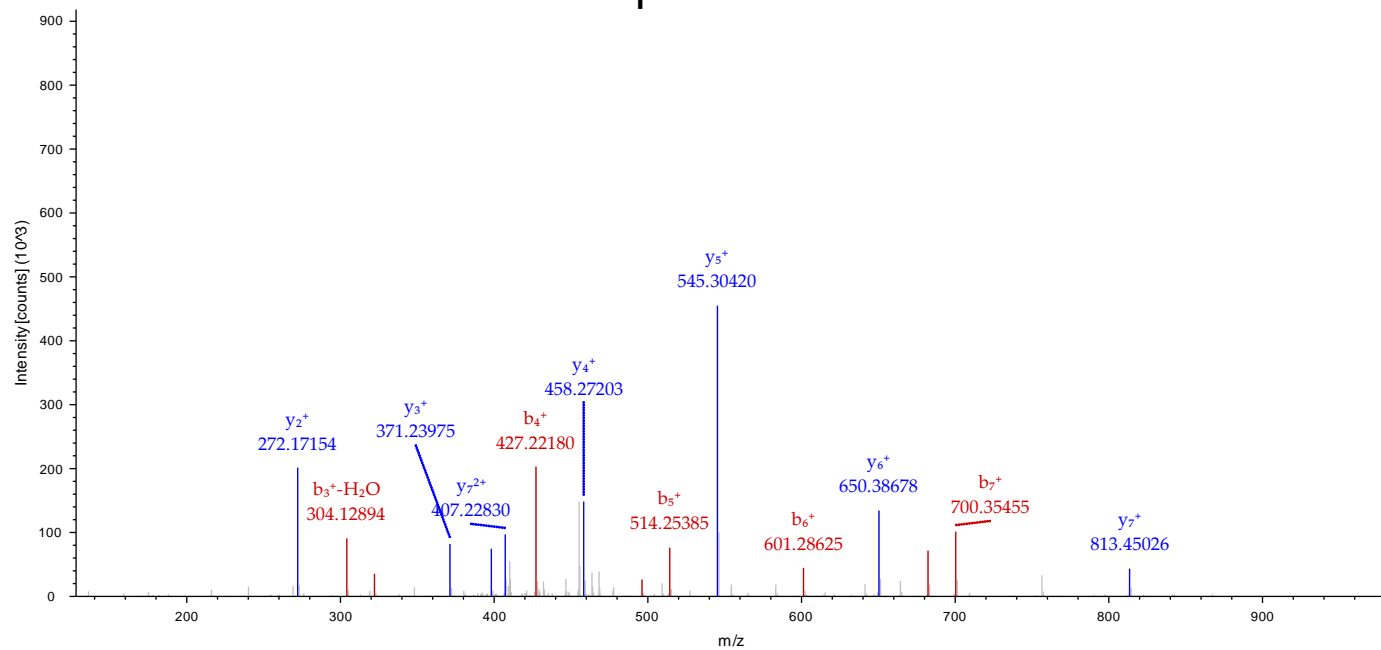

GTYYVSSVPR

CLL replicate 2

unlabeled

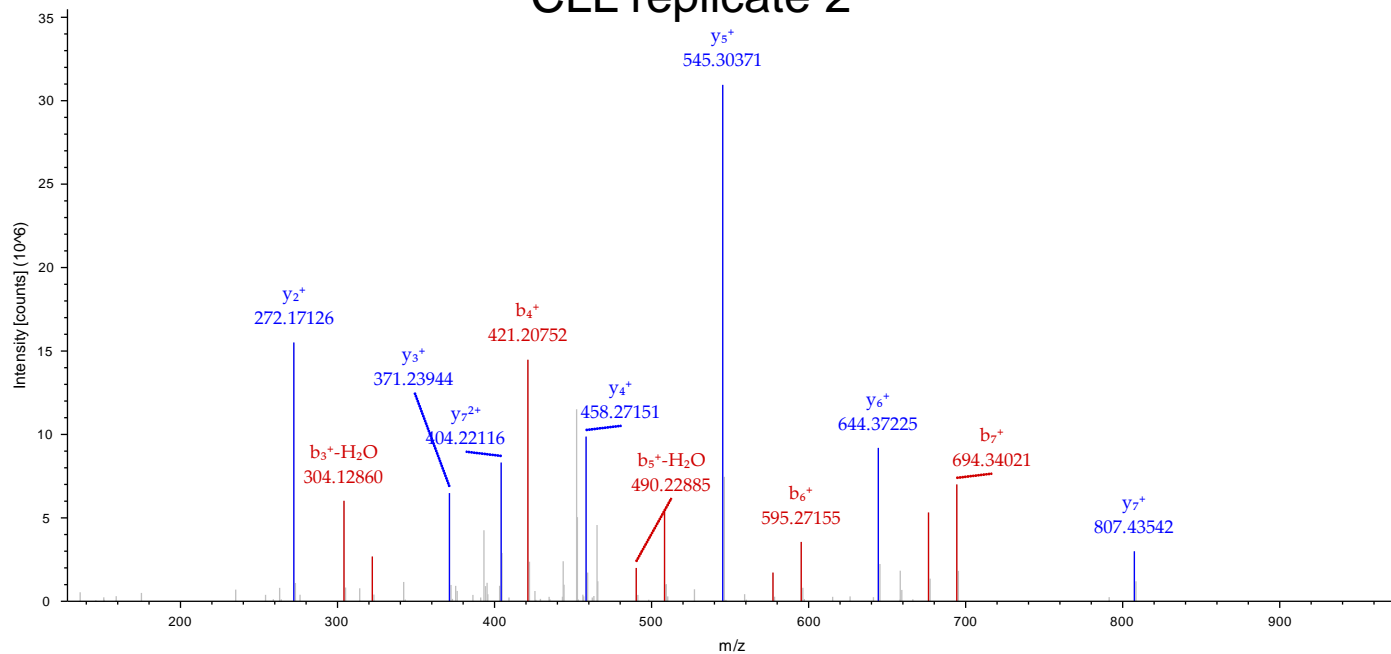

GTYYVSSVPR

JY replicate 2

labeled

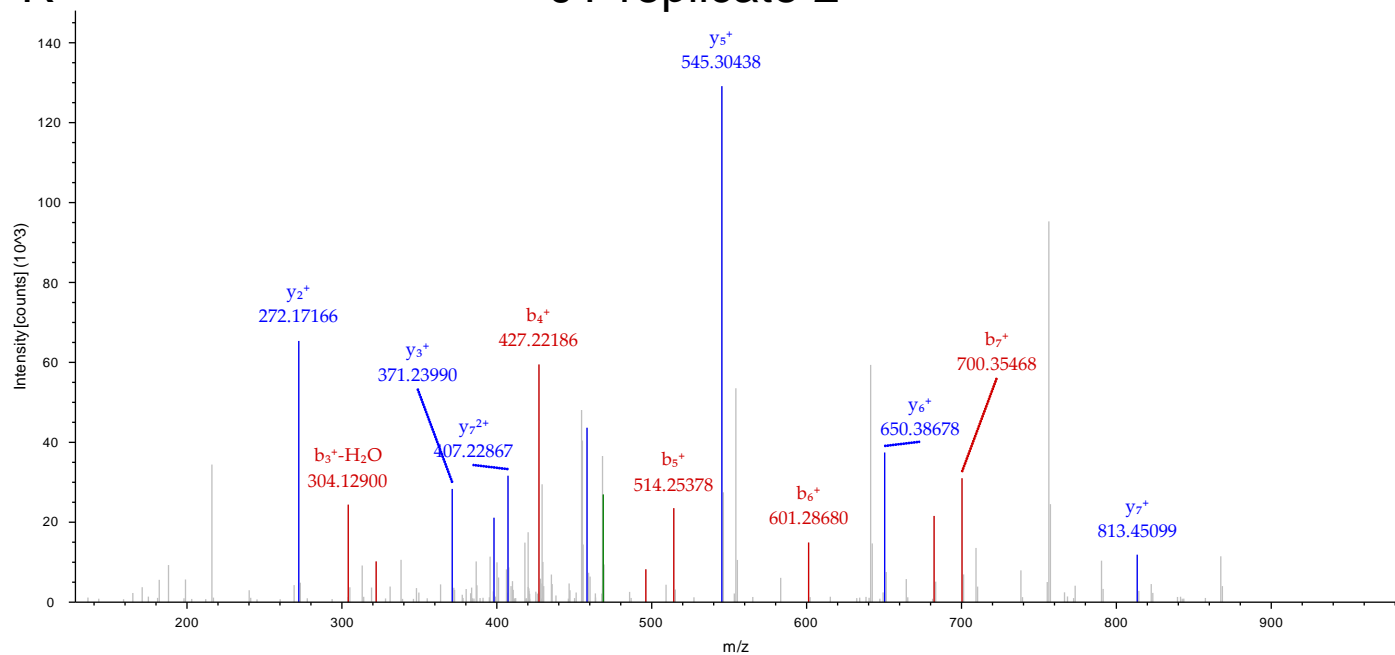



GTYPSSVPR

CLL replicate 3

unlabeled

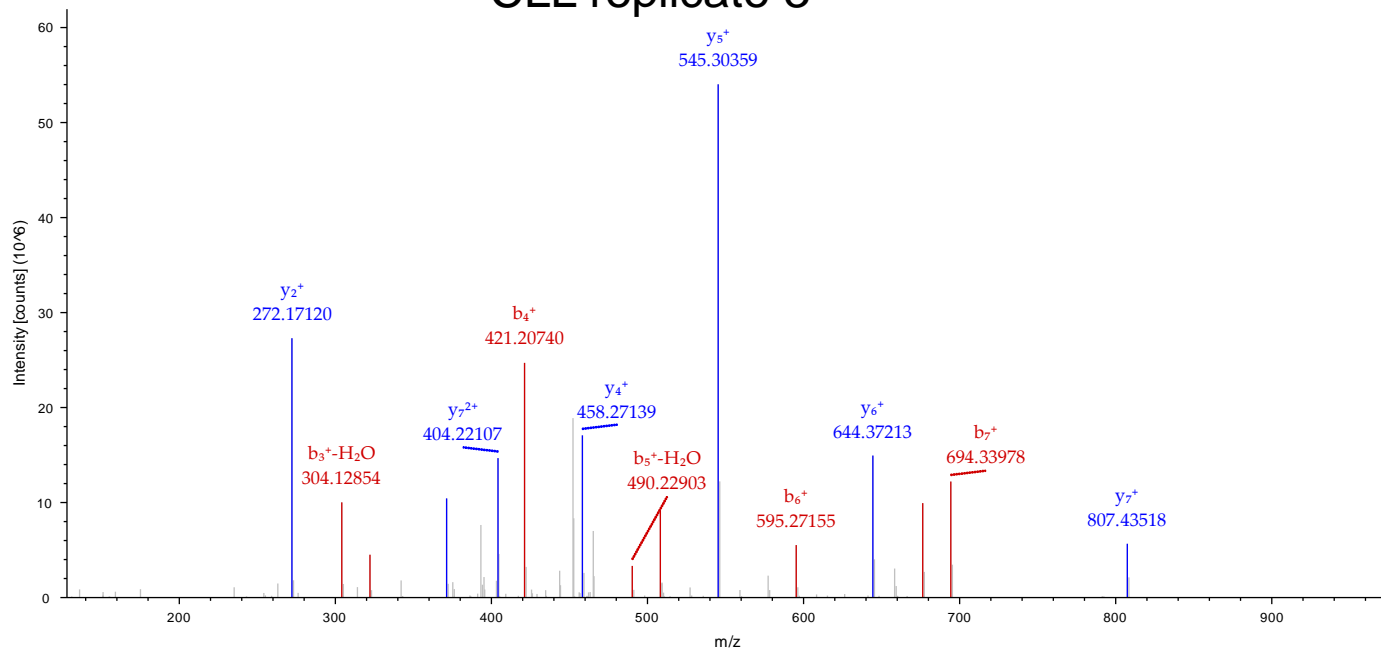

GTYPSSVPR

JY replicate 3

labeled

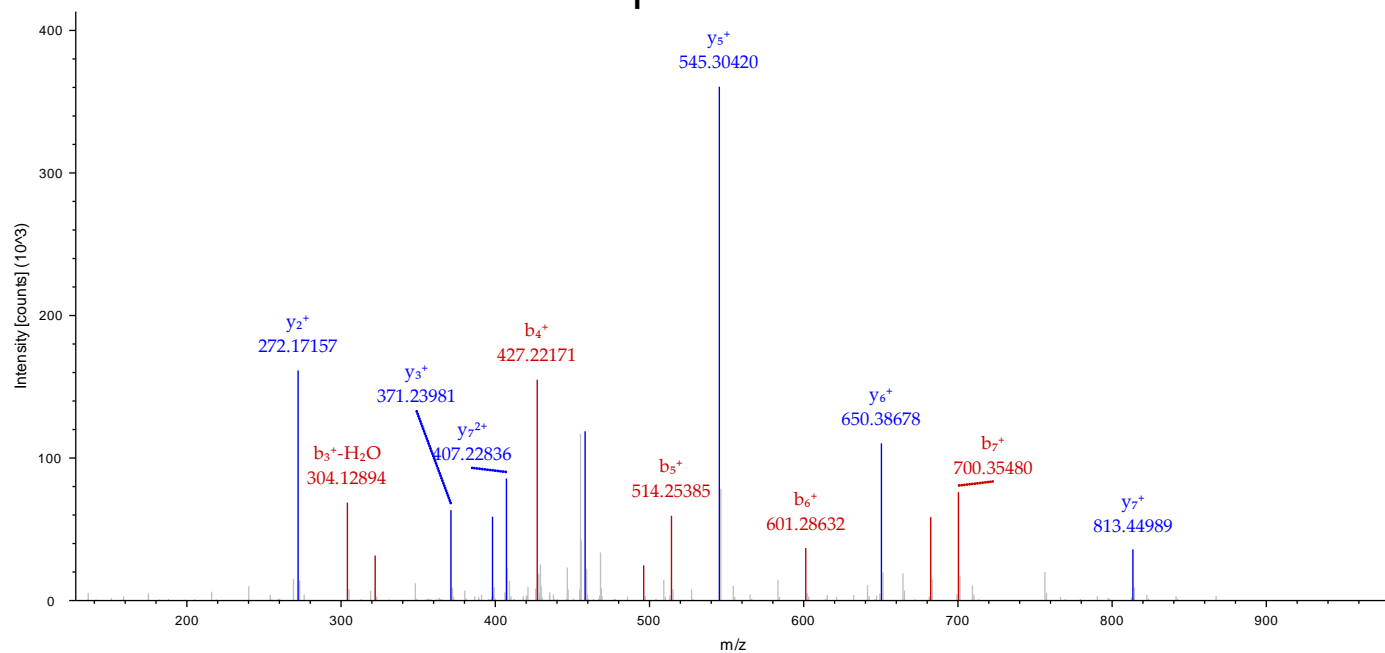

GTYYVSSVPR

BC replicate 1

unlabeled

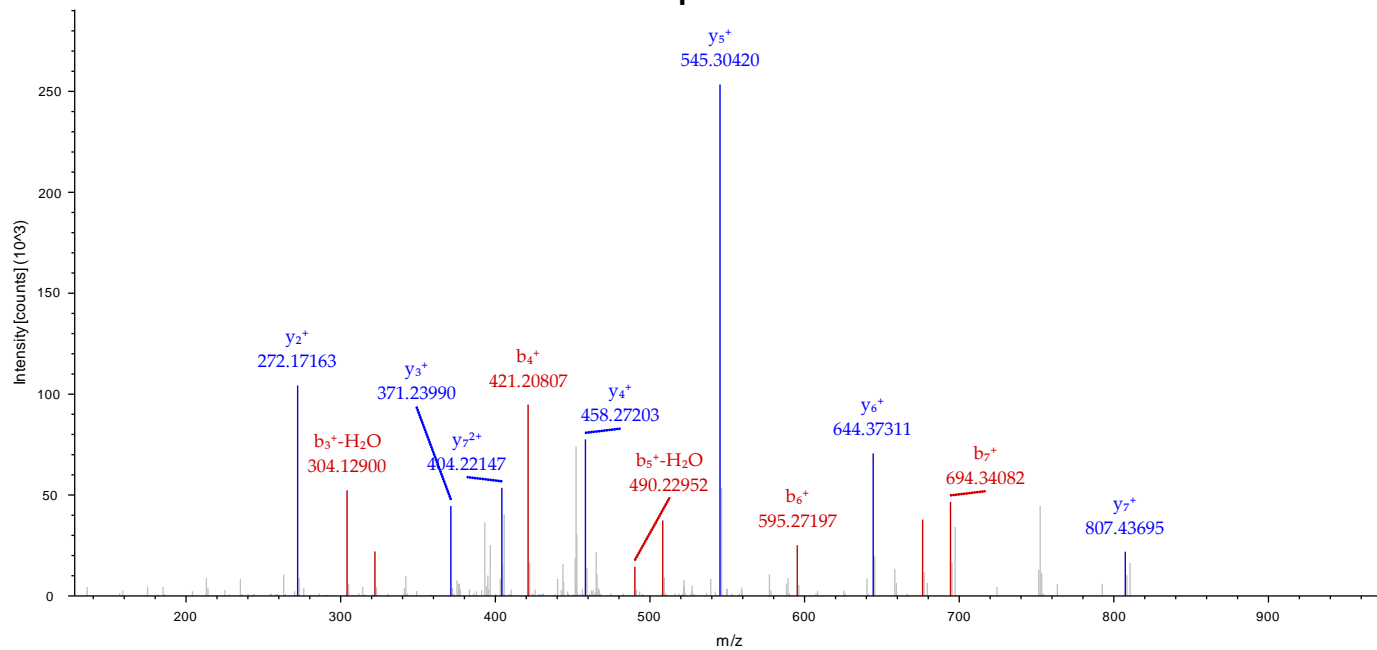

GTYYVSSVPR

BC replicate 2

unlabeled

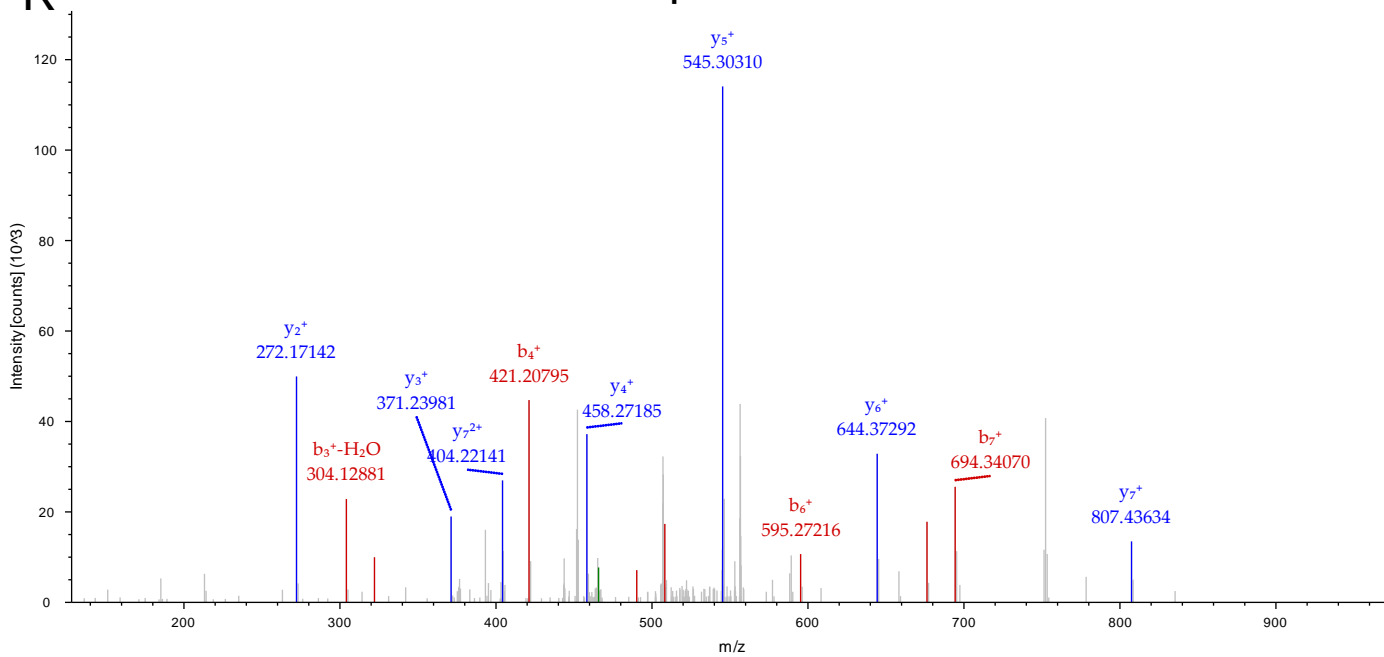

GTYYVSSVPR

BC replicate 3

unlabeled

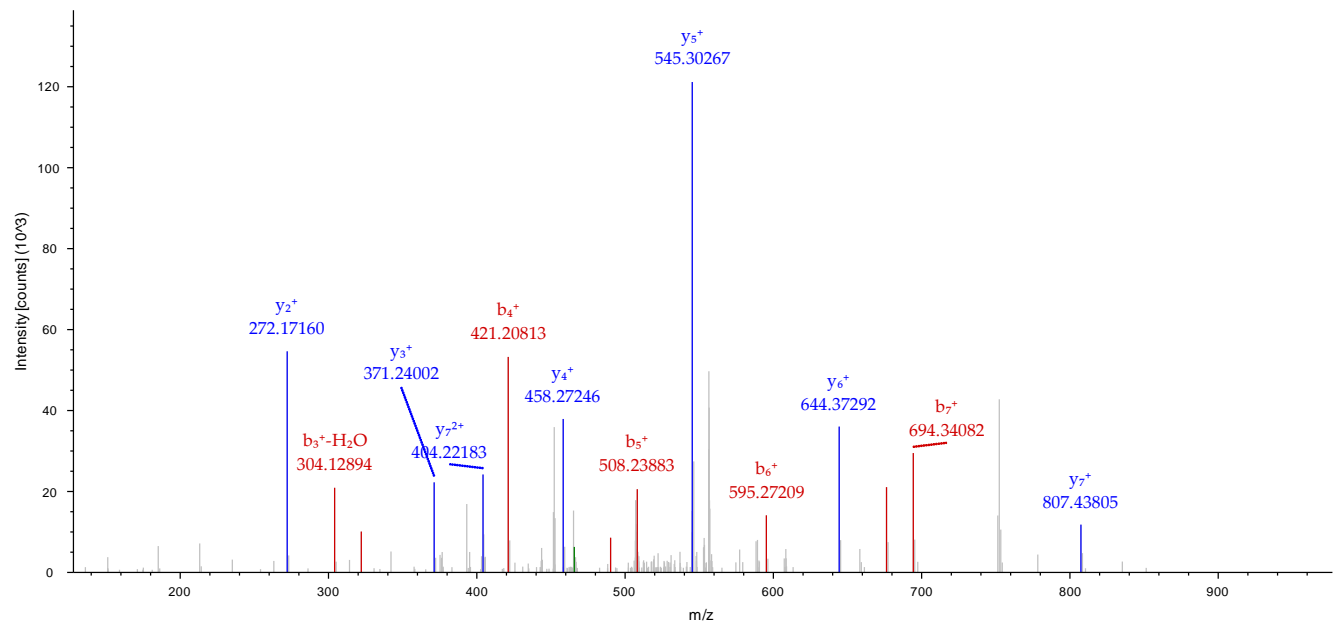

SVINLVIVK

# CLL replicate 1

unlabeled

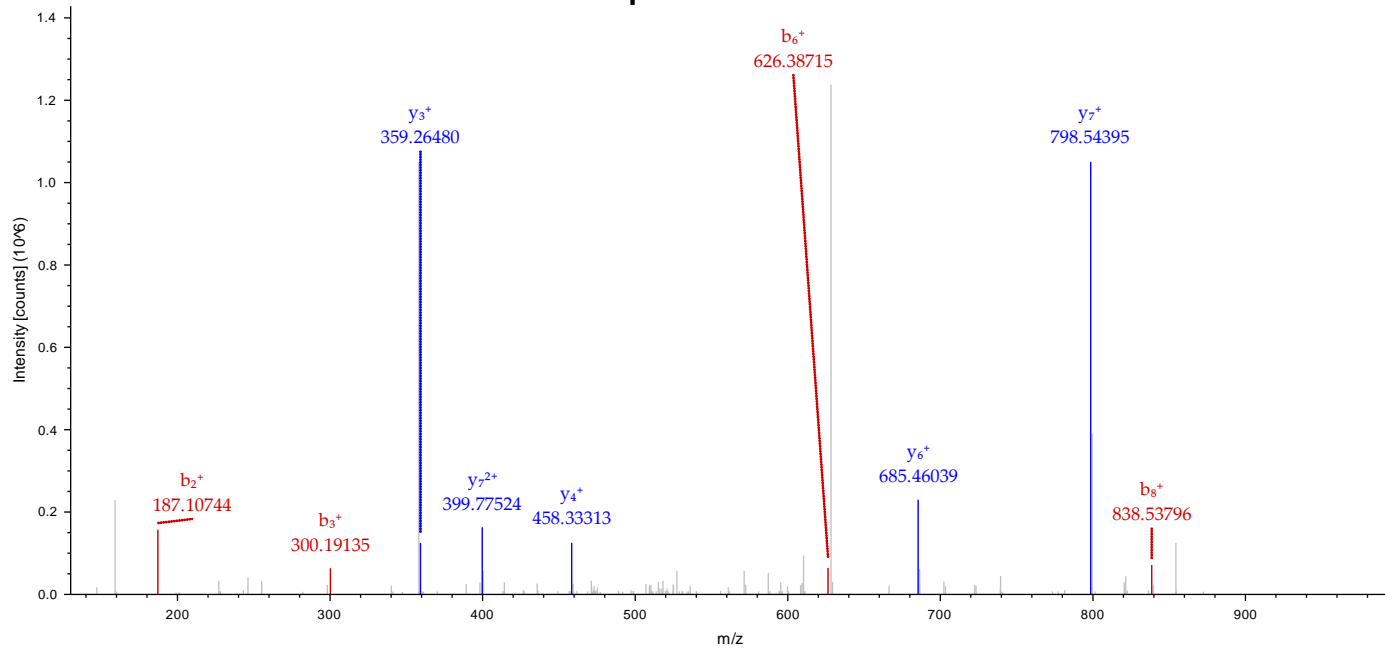

SVINLVIVK

# JY replicate 1

labeled

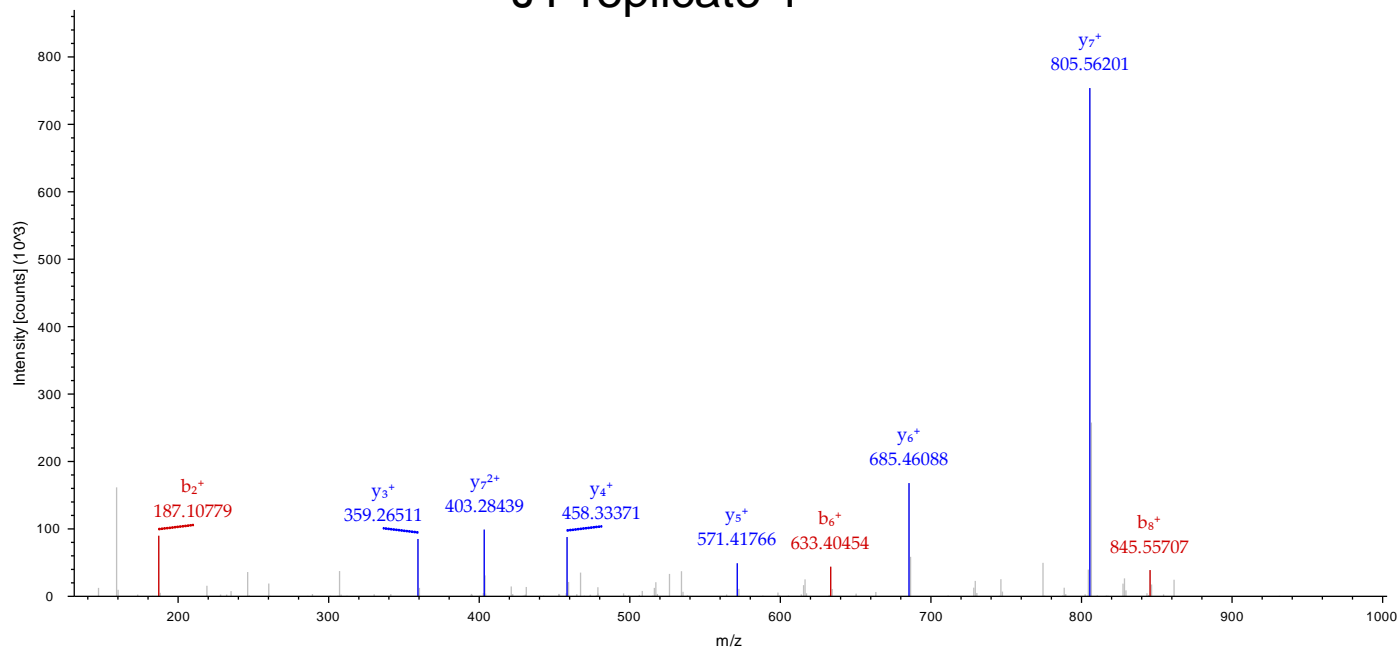

SVINLVIVK

CLL replicate 2

unlabeled

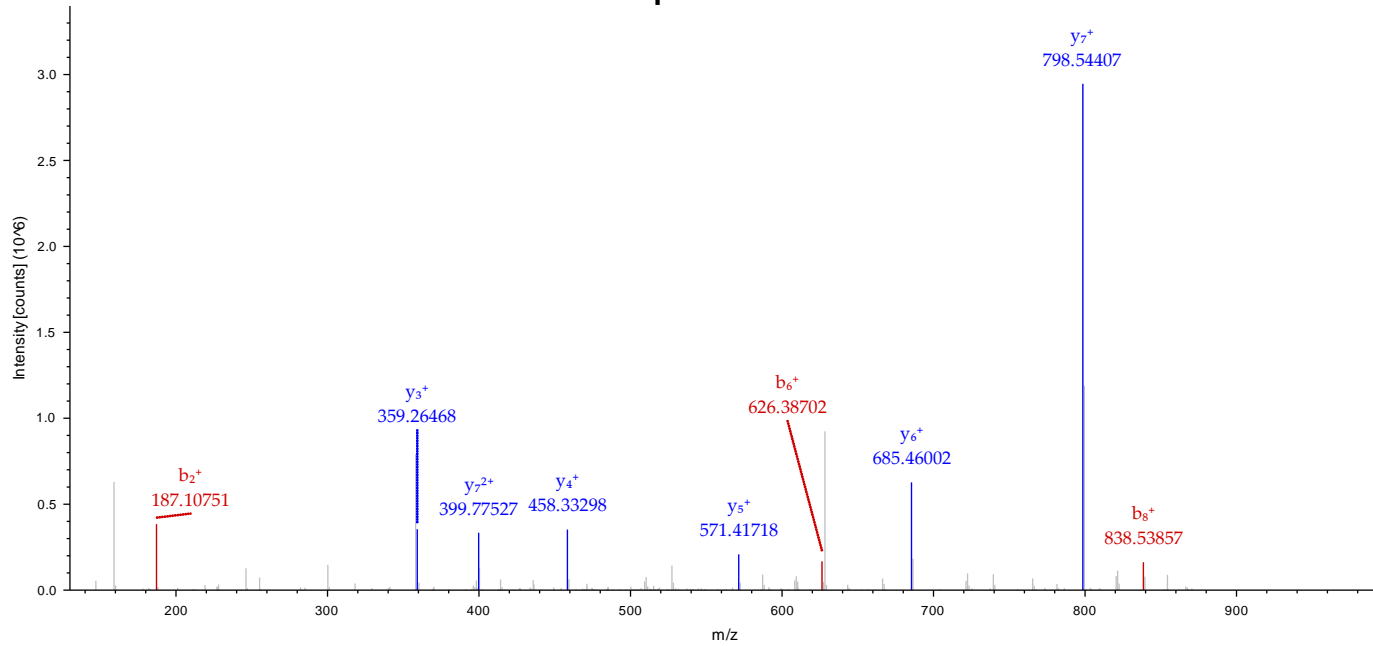

SVINLVIVK

JY replicate 2

labeled

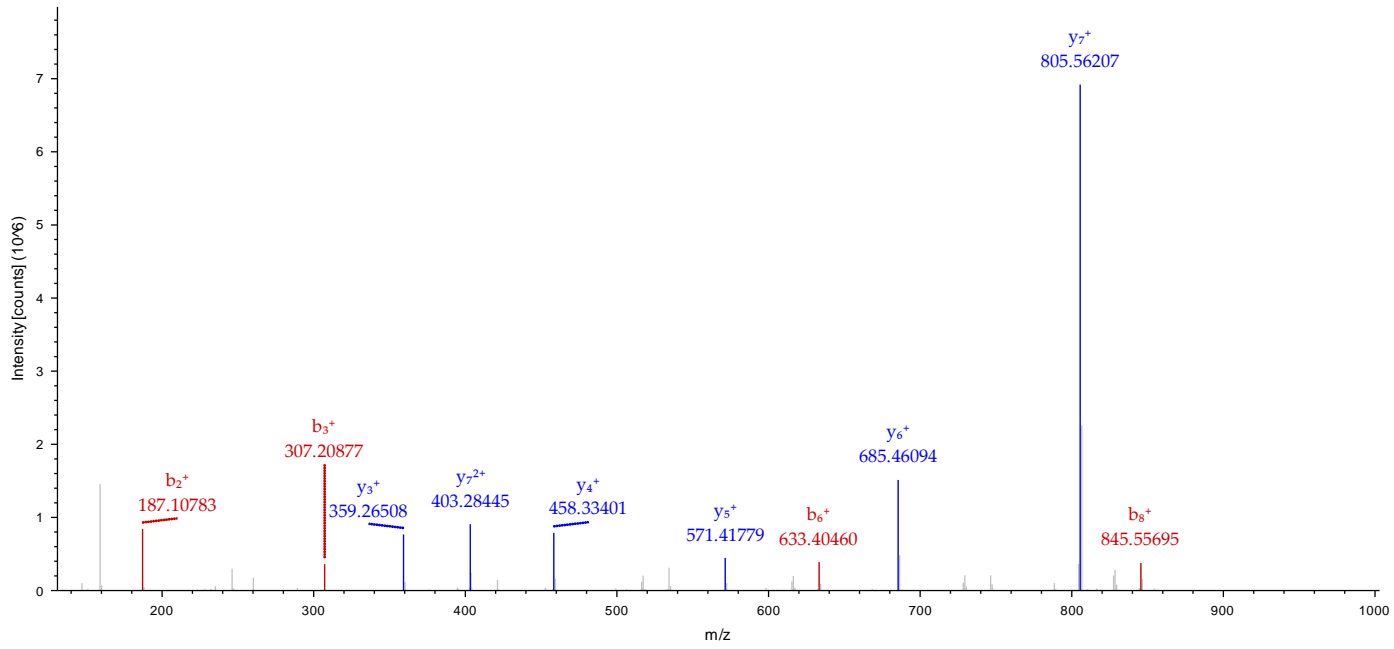

SVINLVIVK

# CLL replicate 3

unlabeled

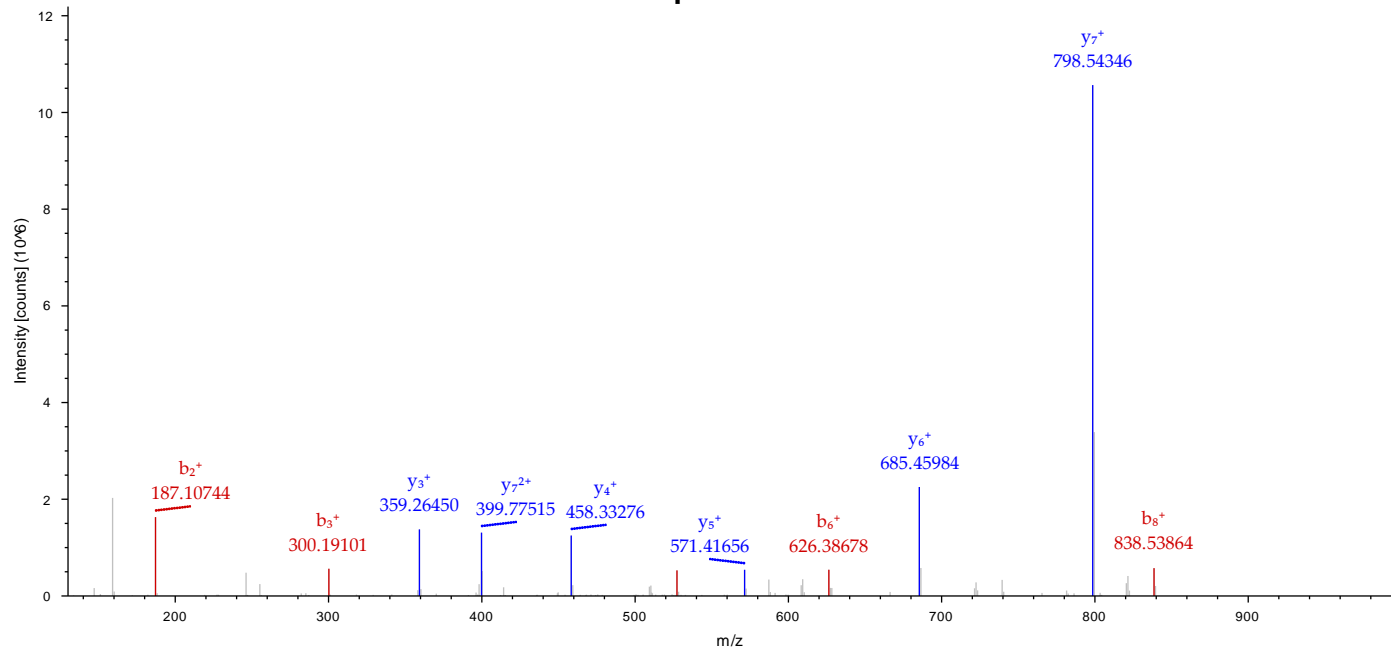

SVINLVIVK

# JY replicate 3

labeled

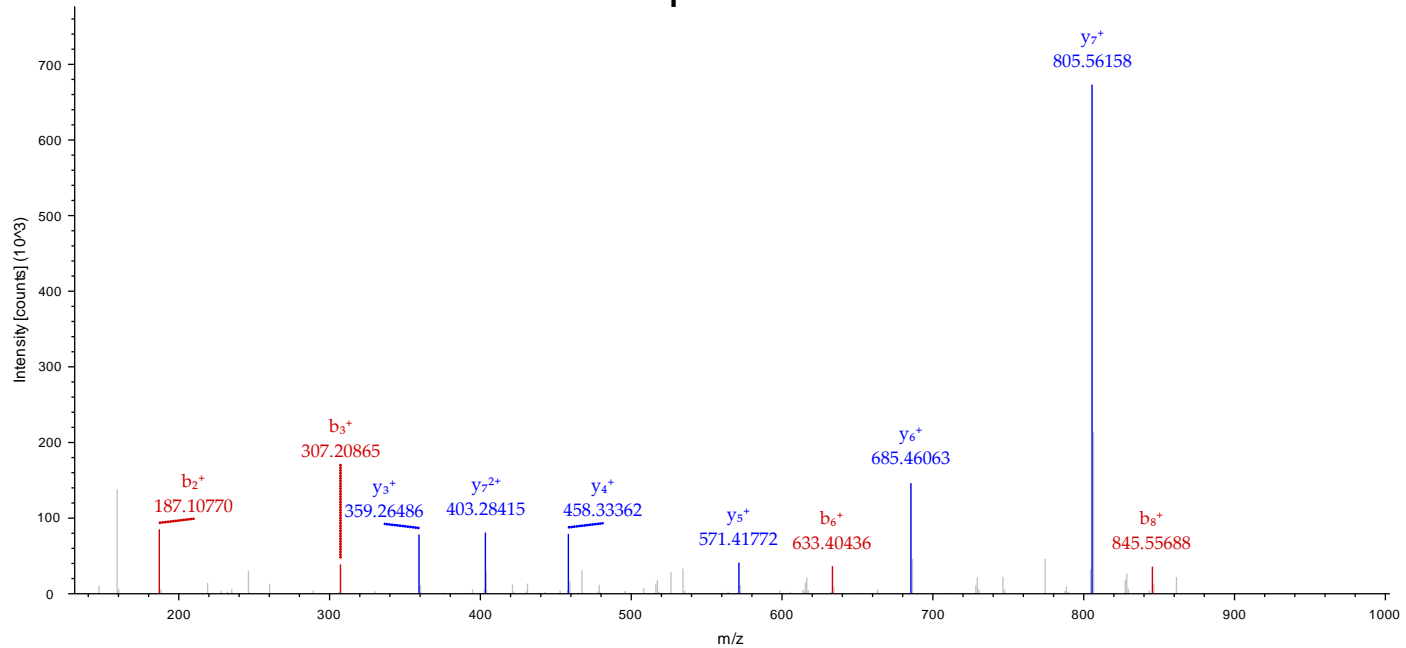

SVINLVIVK

BC replicate 1

unlabeled

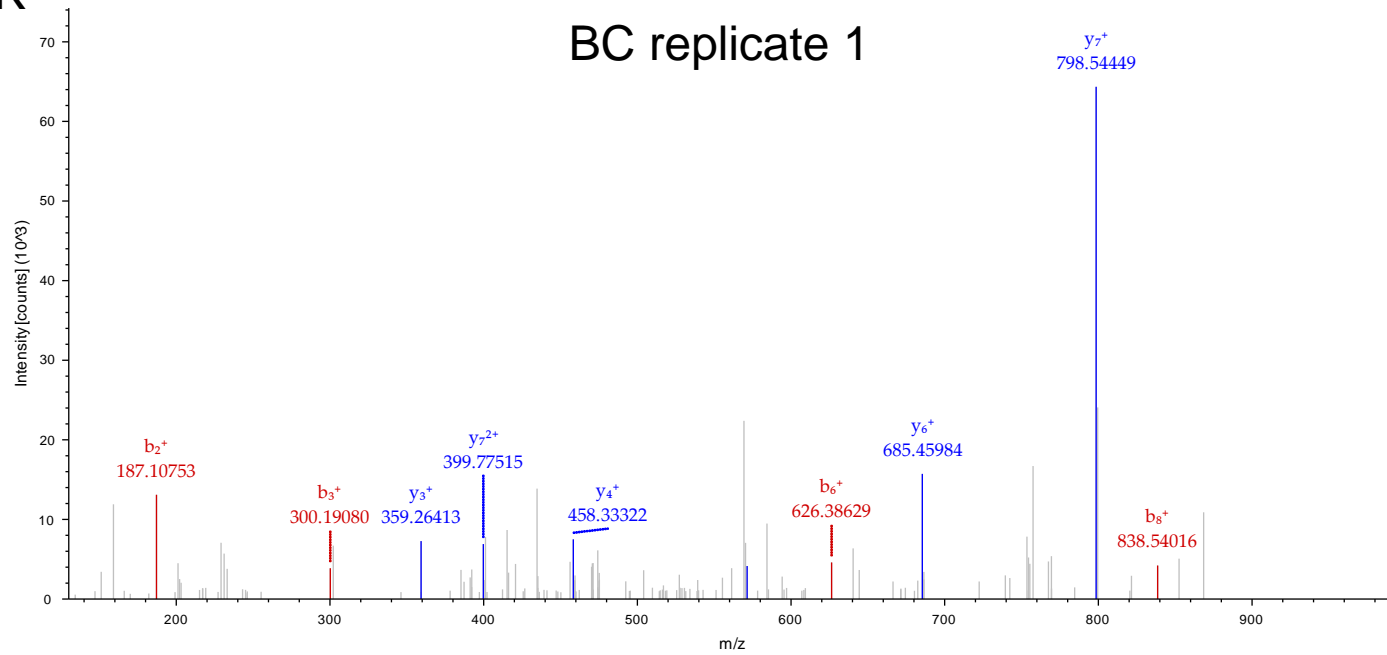

SVINLVIVK

BC replicate 2

unlabeled

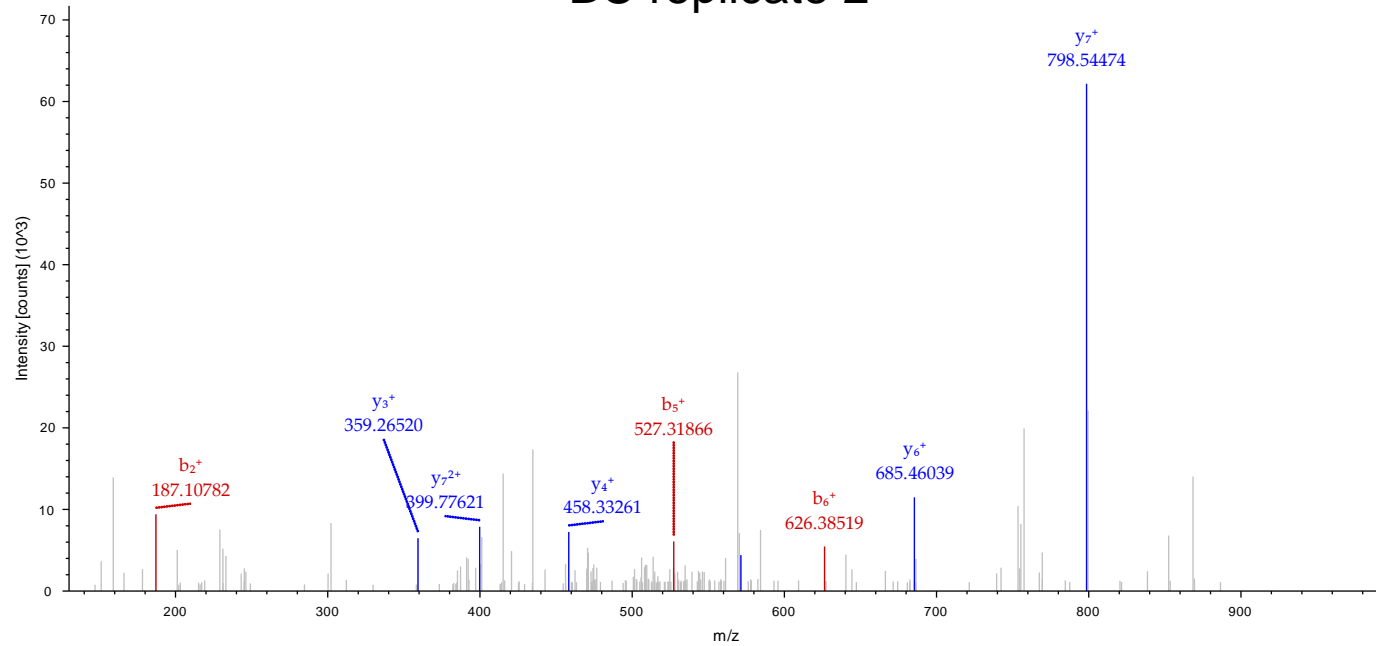

SVINLVIVK

BC replicate 3

unlabeled

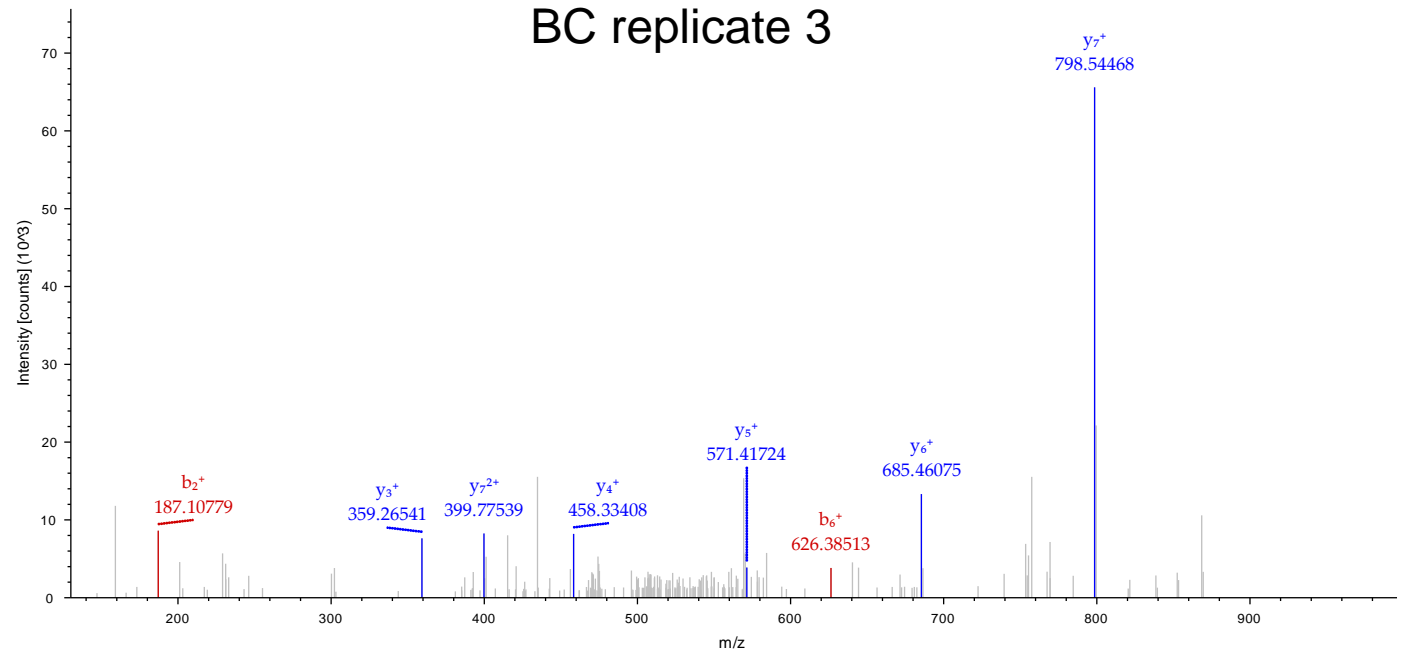



RVYGGITTK

BC replicate 1

unlabeled

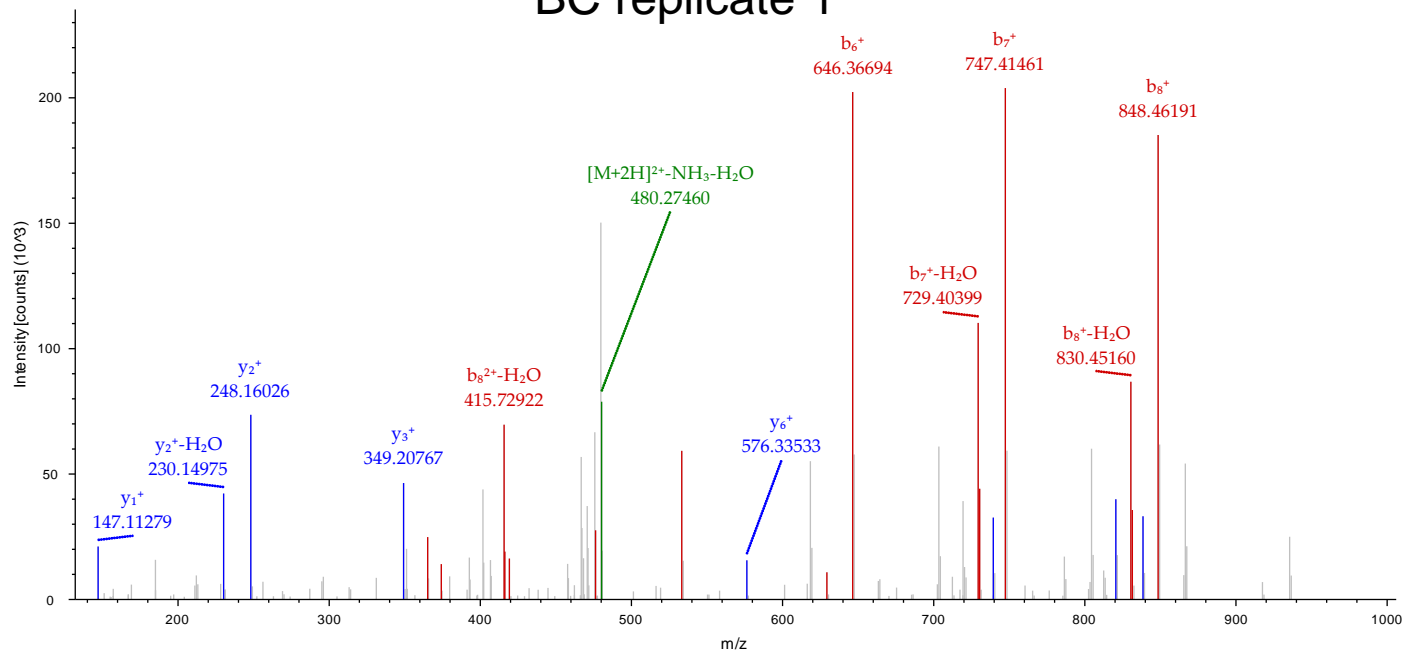

RVYGGITTK

JY replicate 1

labeled

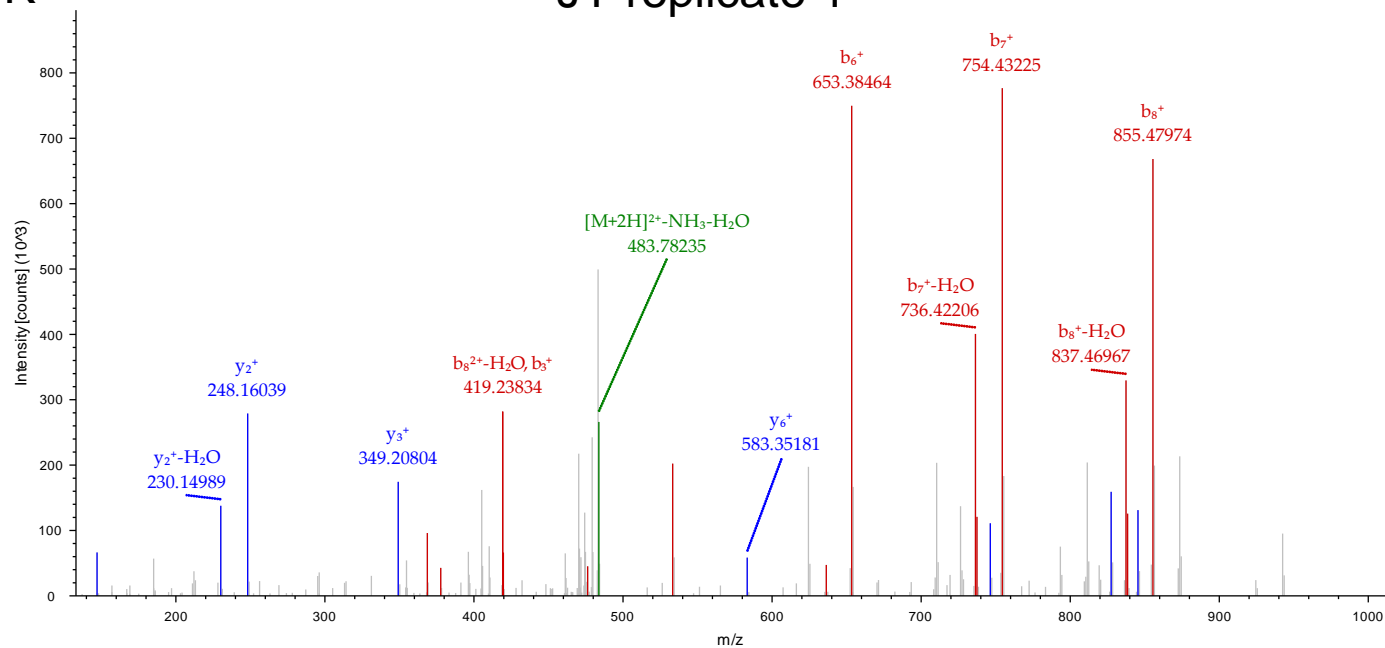

RVYGGITTK

BC replicate 2

unlabeled

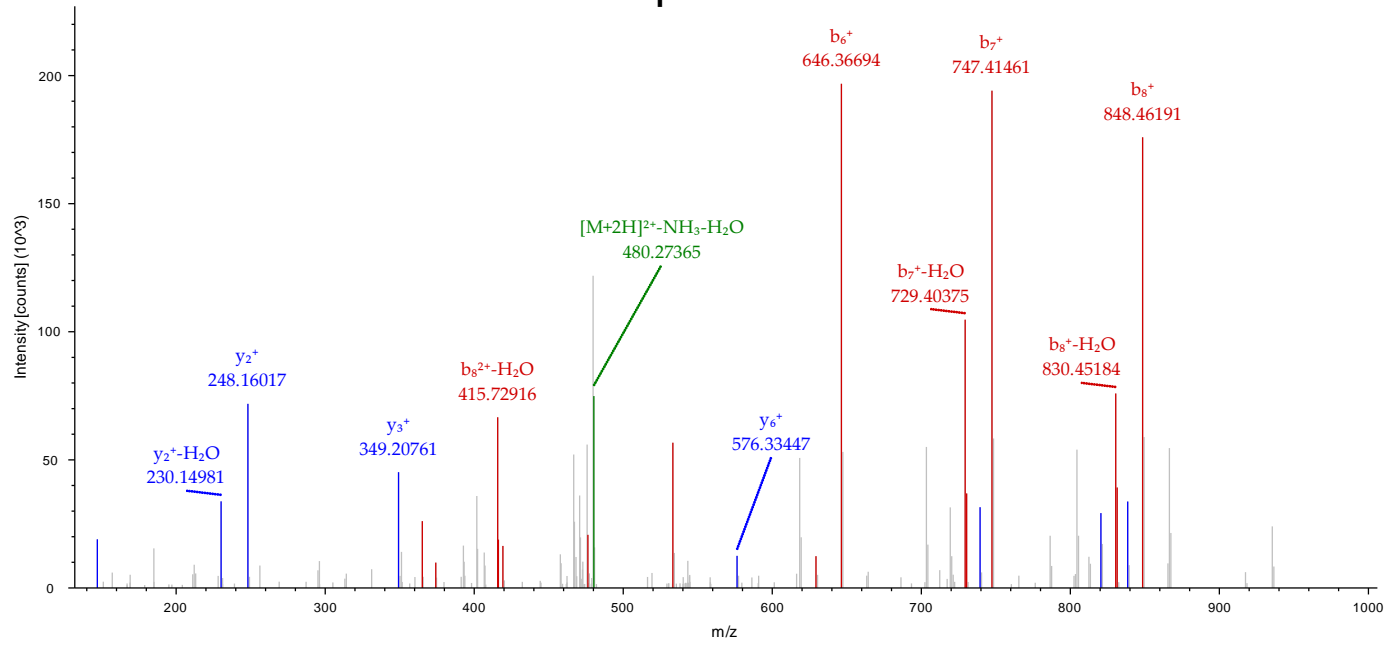

RVYGGITTK

JY replicate 2

labeled

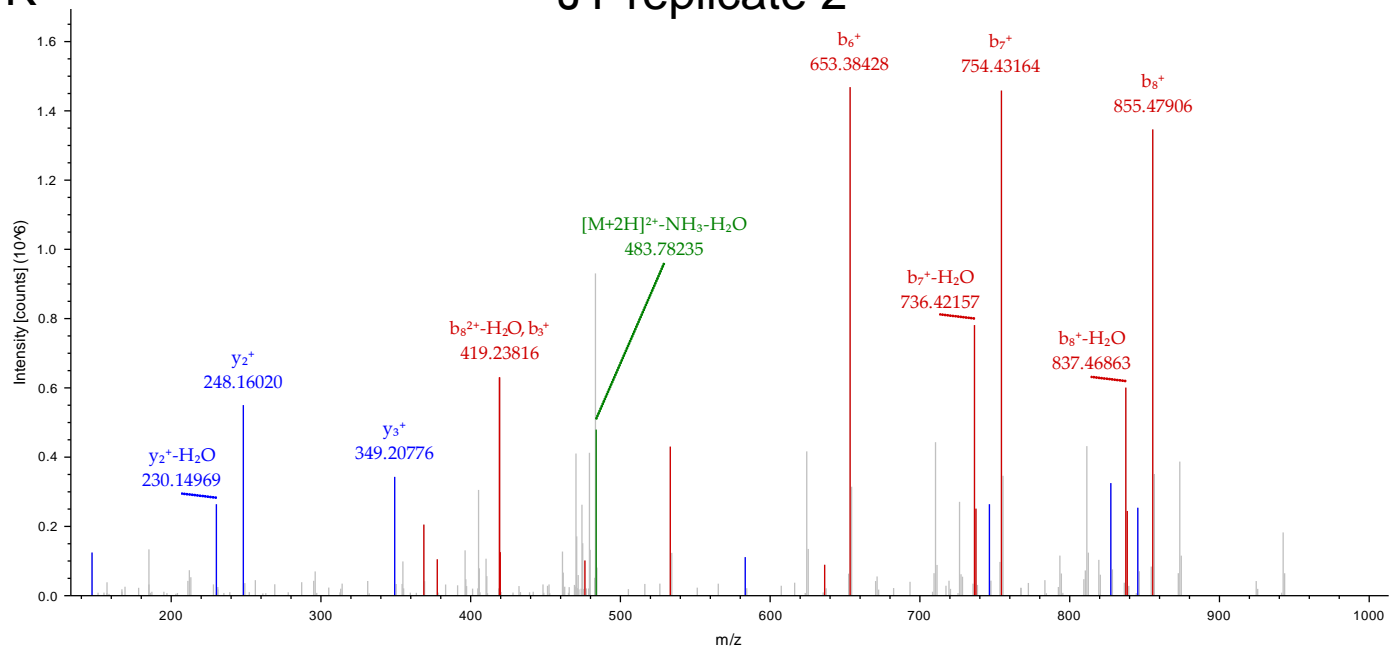

RVYGGITTK

BC replicate 3

unlabeled

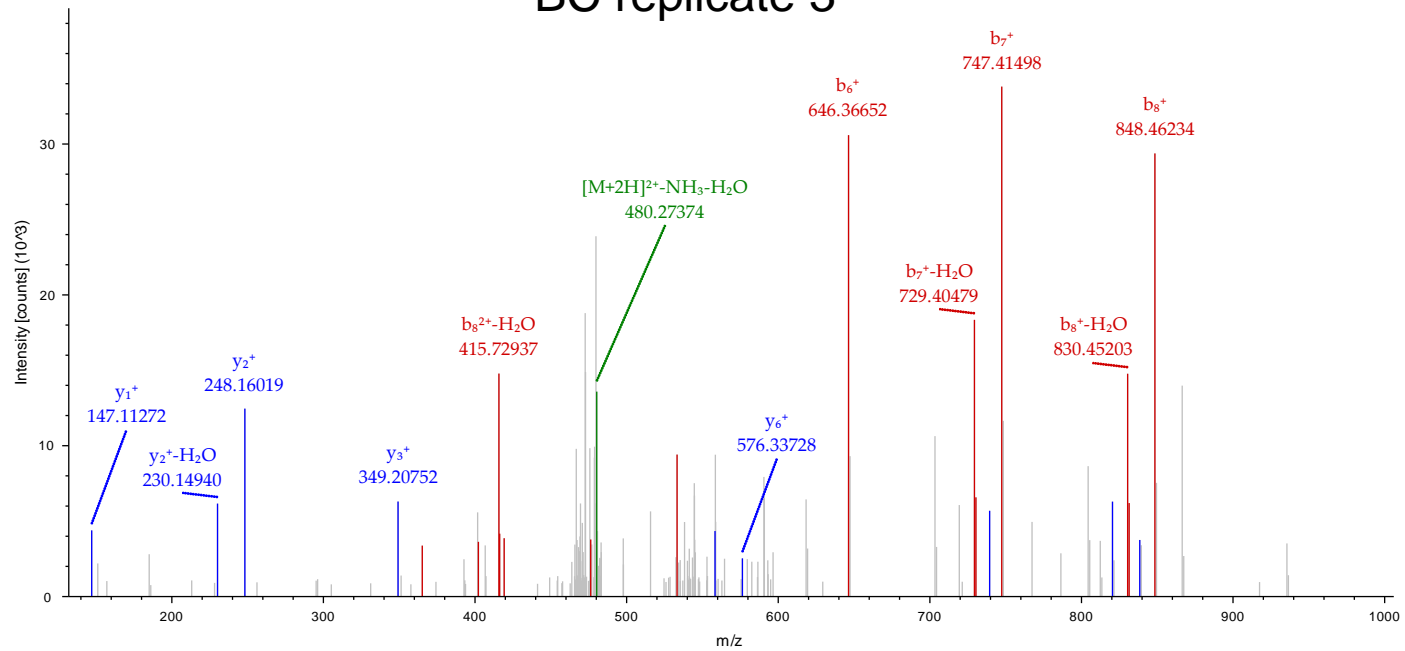

RVYGGITTK

JY replicate 3

labeled

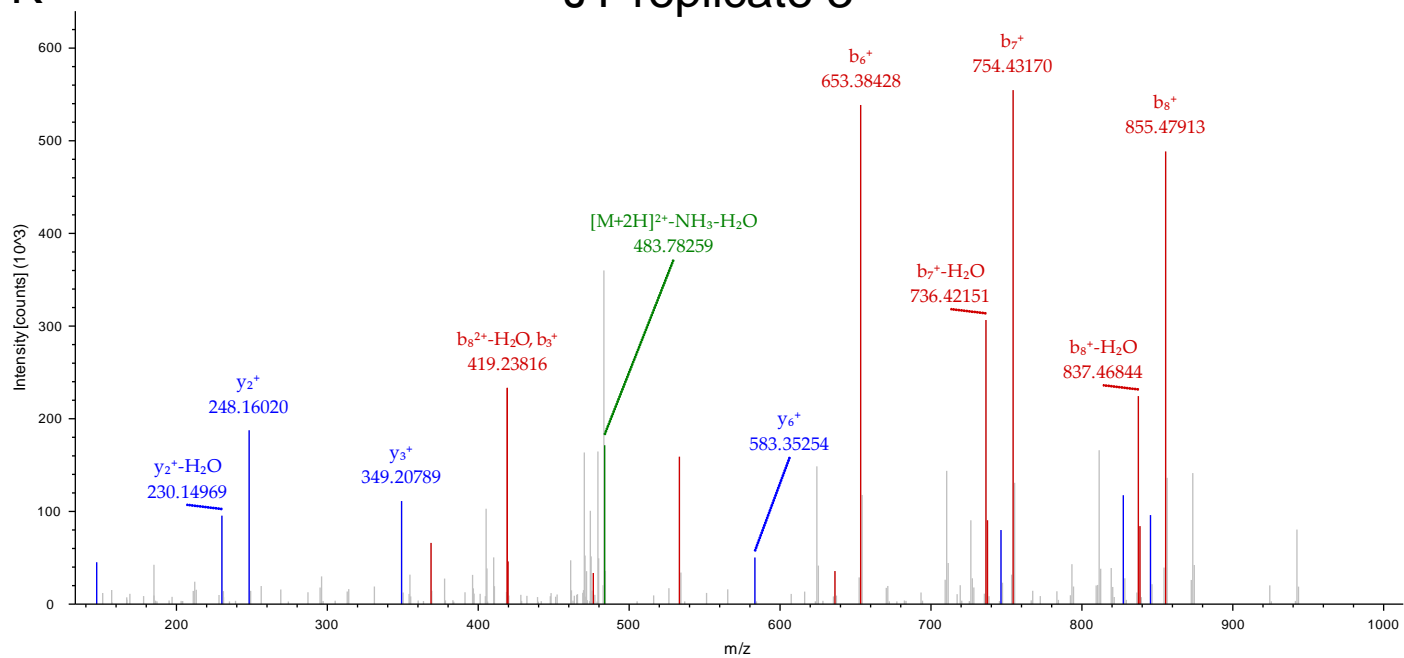

RVYGGITTK

CLL replicate 1

unlabeled

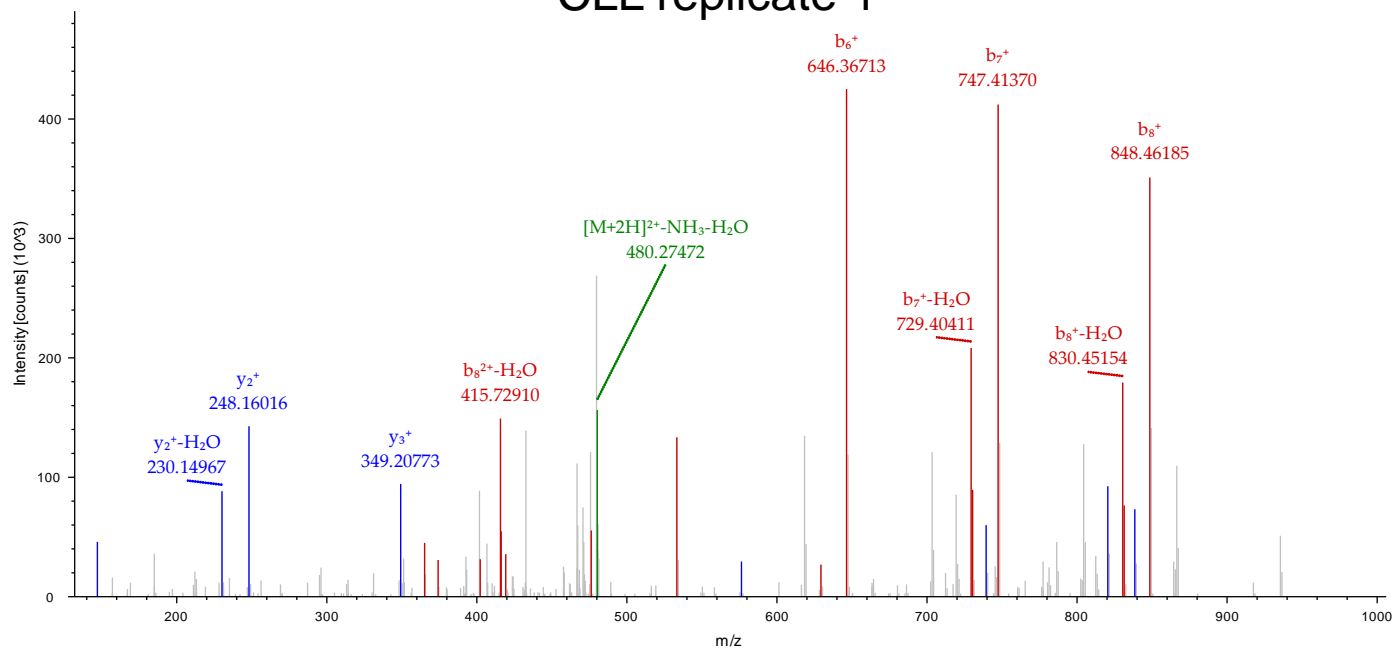

RVYGGITTK

CLL replicate 2

unlabeled

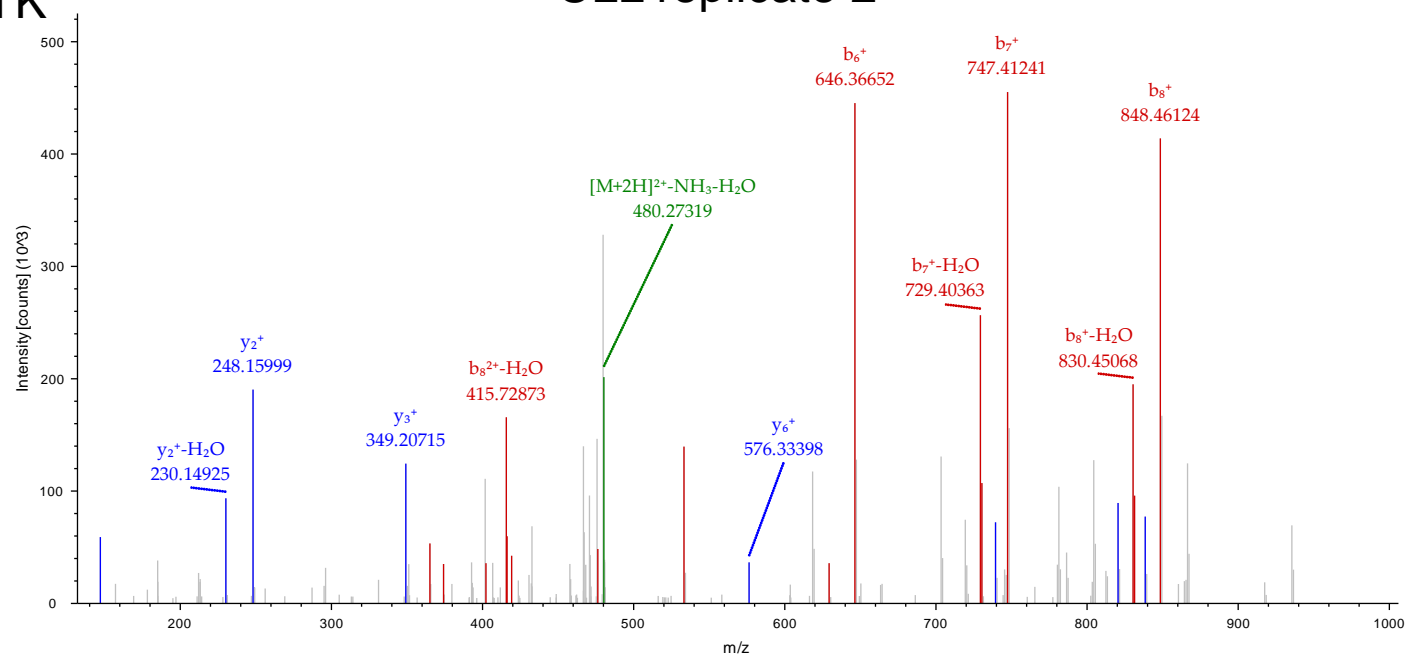

unlabeled

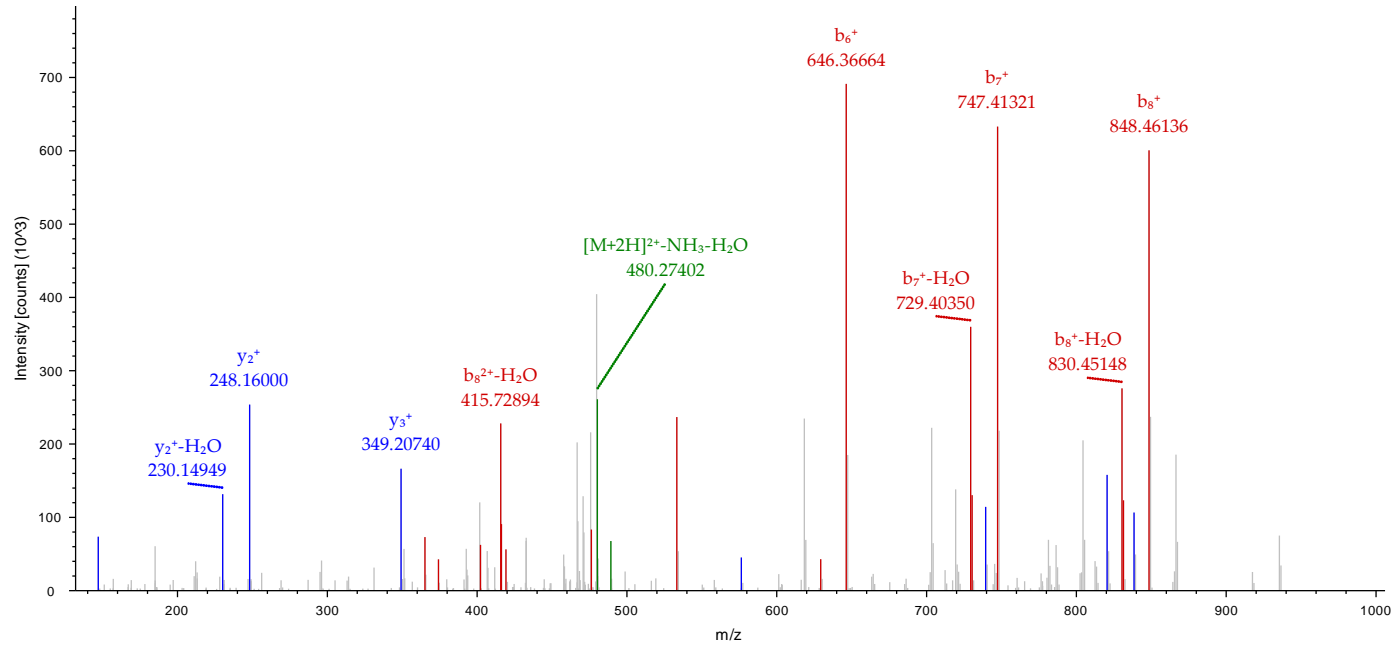

RPSGPGPEL

CLL replicate 1

unlabeled

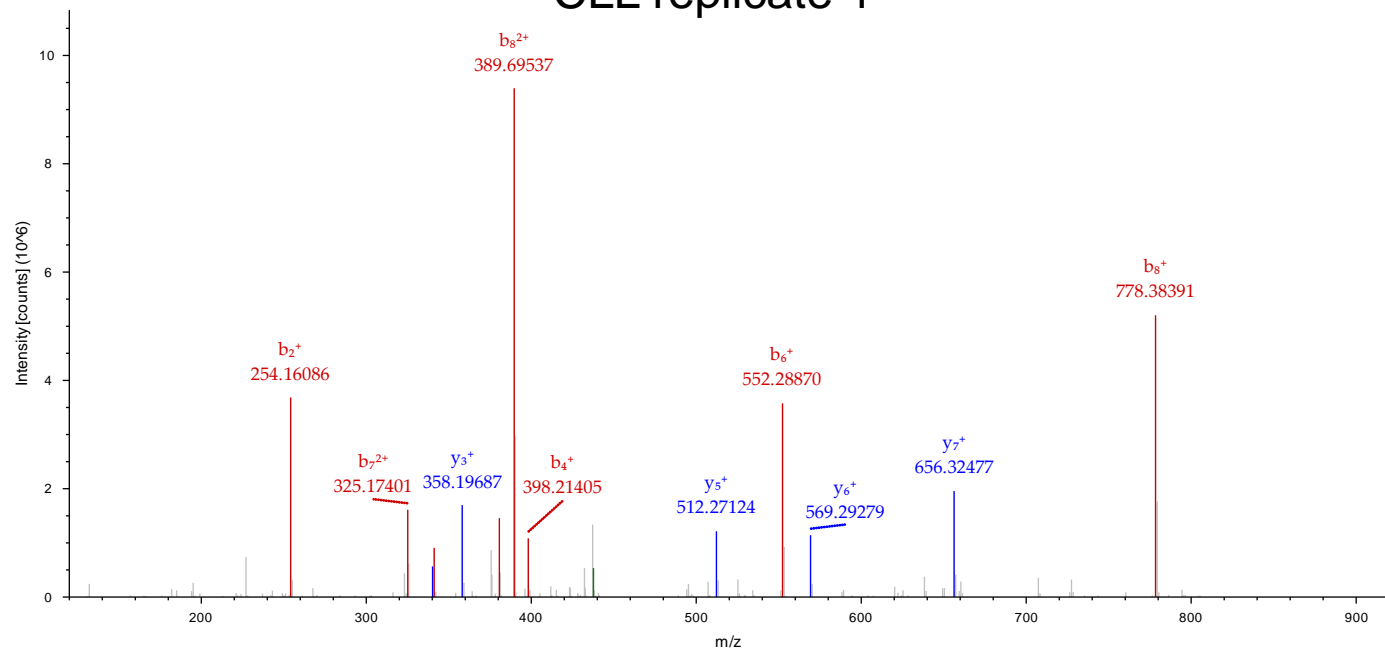

RPSGPGPEL

CLL replicate 2

unlabeled

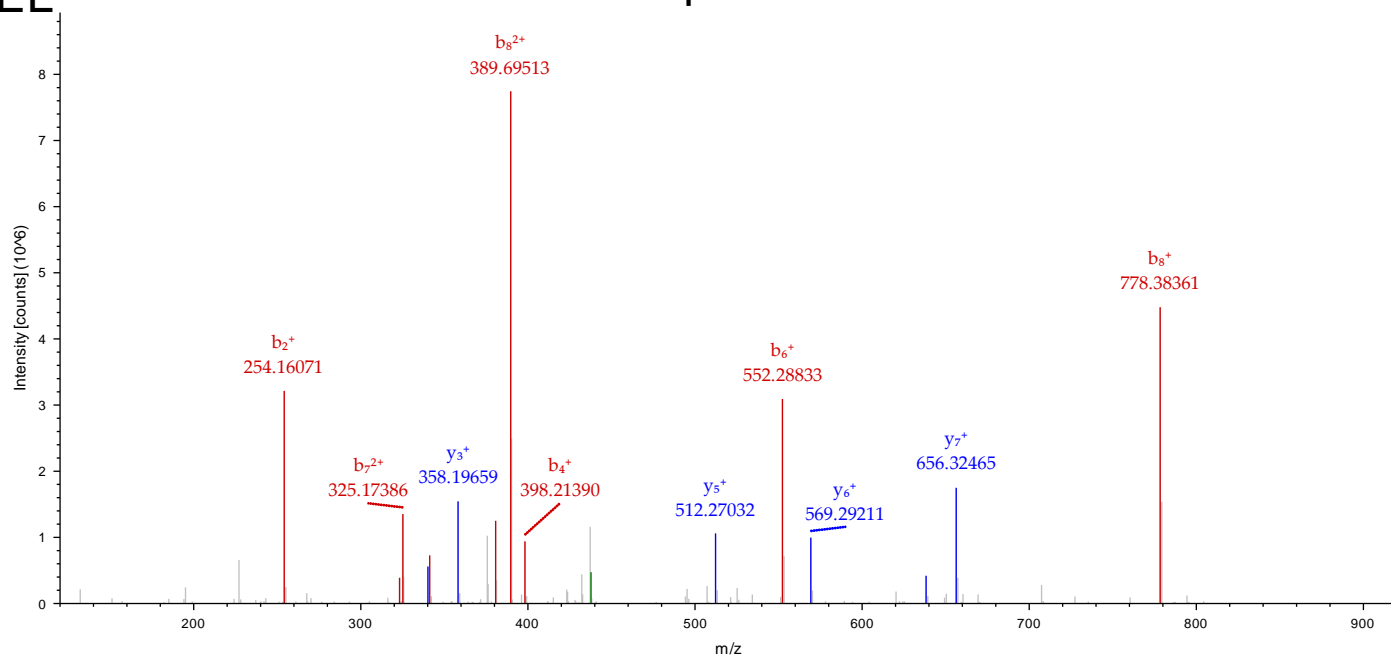

unlabeled

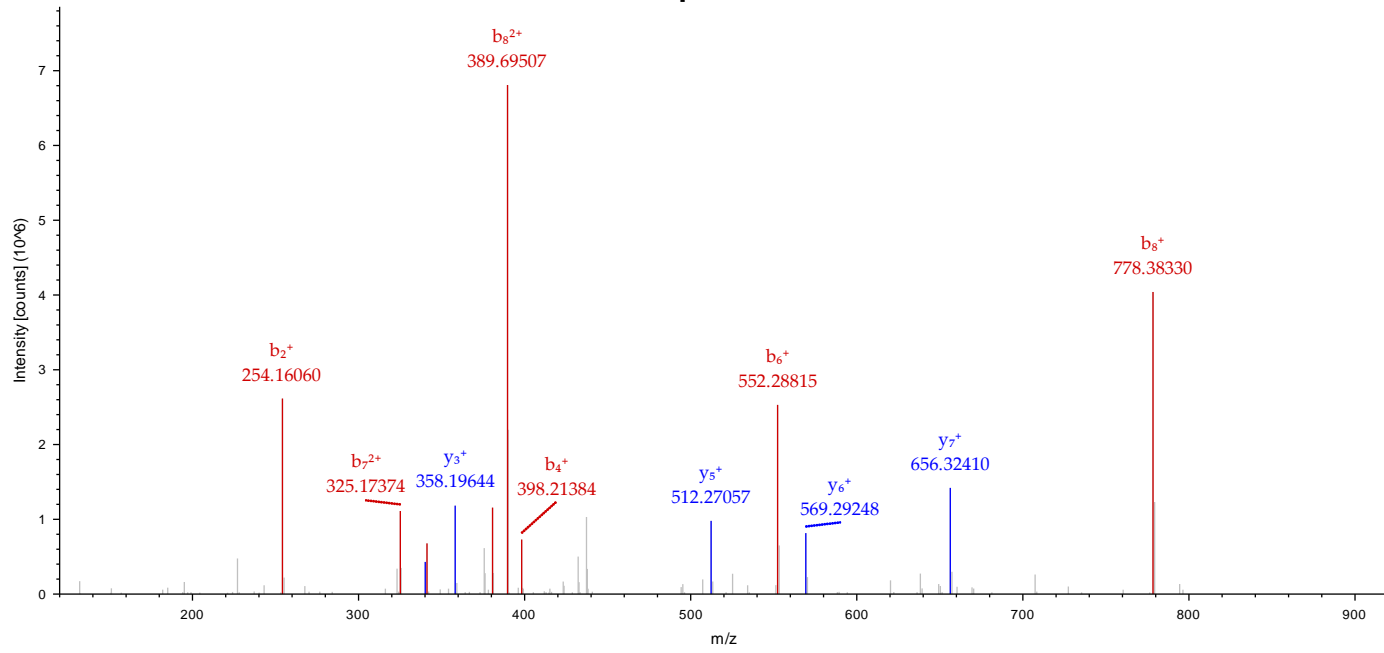

Supplement: 154045_2_supp_455920_q3txy1.pdf [file 154045_2_supp_455920_q3txy1.pdf]
