# Supplementary material
Source: PubMed Central journal article supplement (PMC7050110)

## Replicate 1

unlabeled

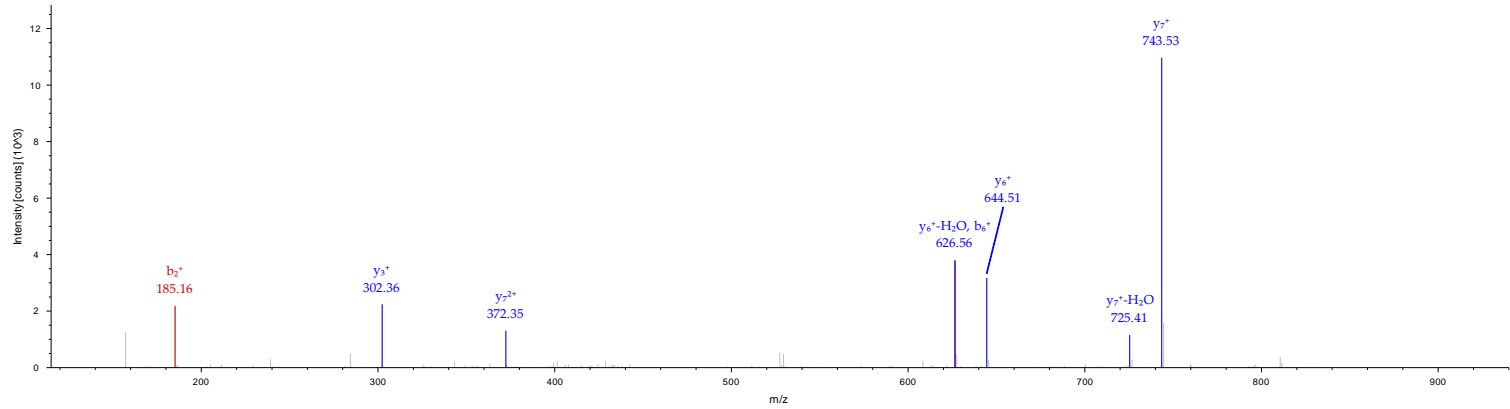

## Replicate 2

unlabeled

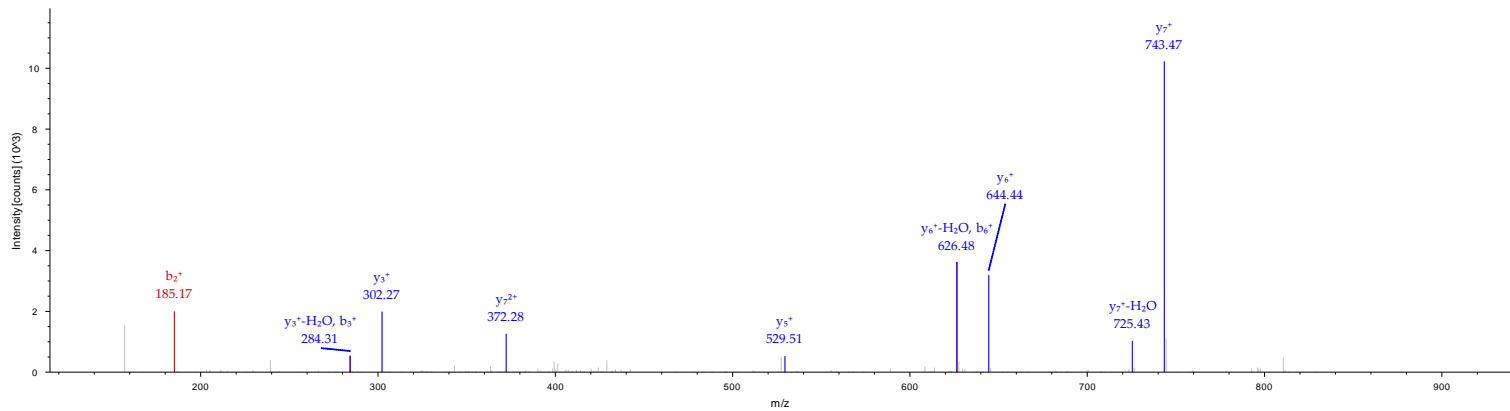

unlabeled

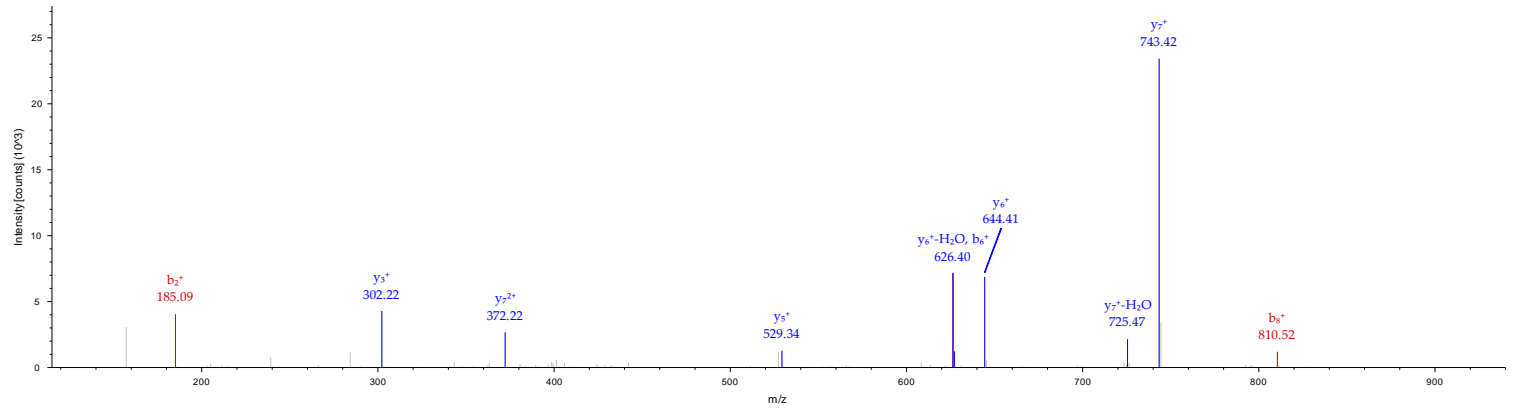

labeled

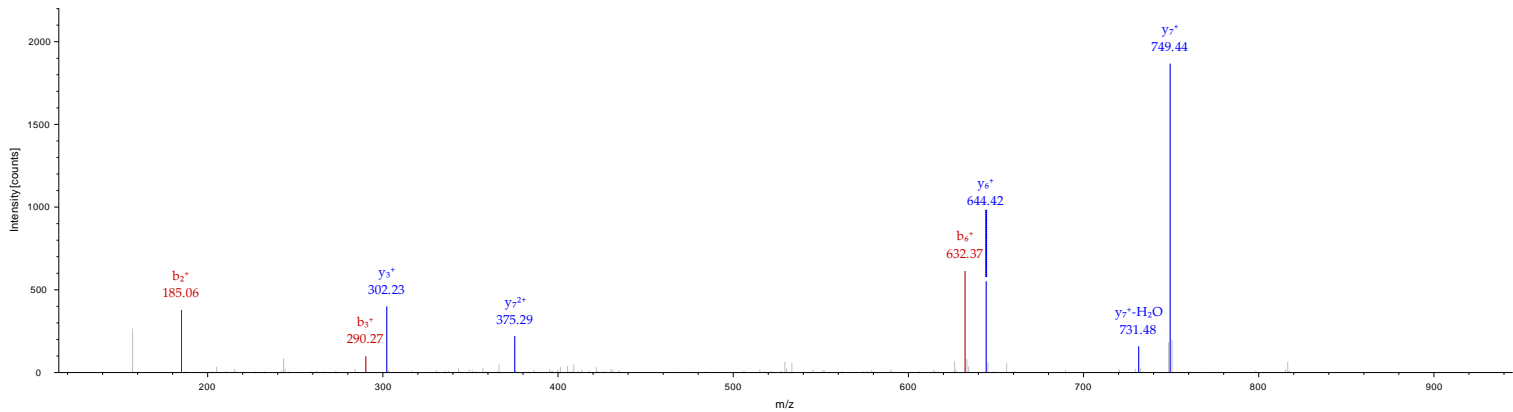

## Replicate 1

unlabeled

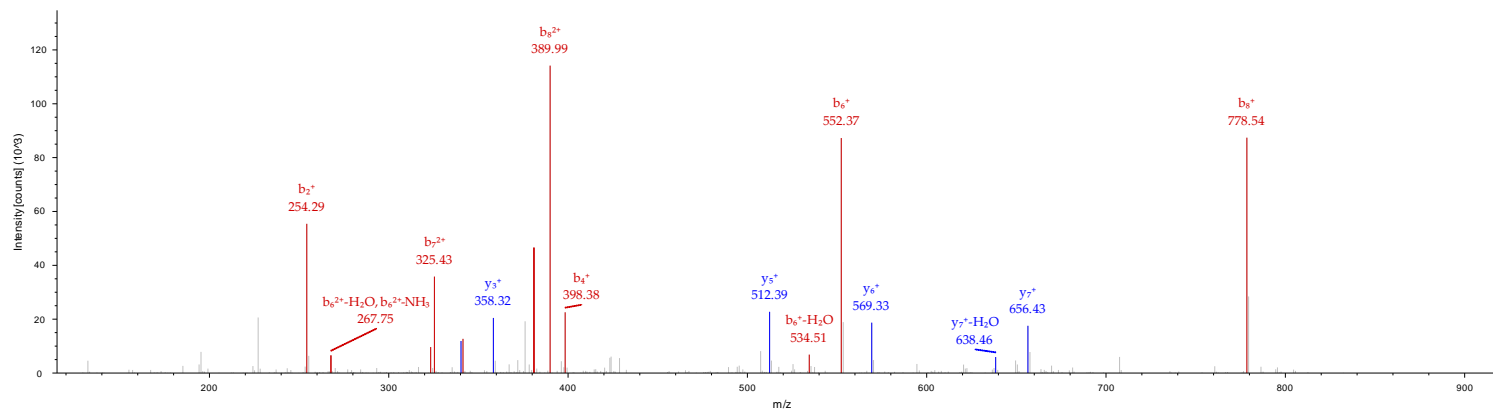

## Replicate 2

unlabeled

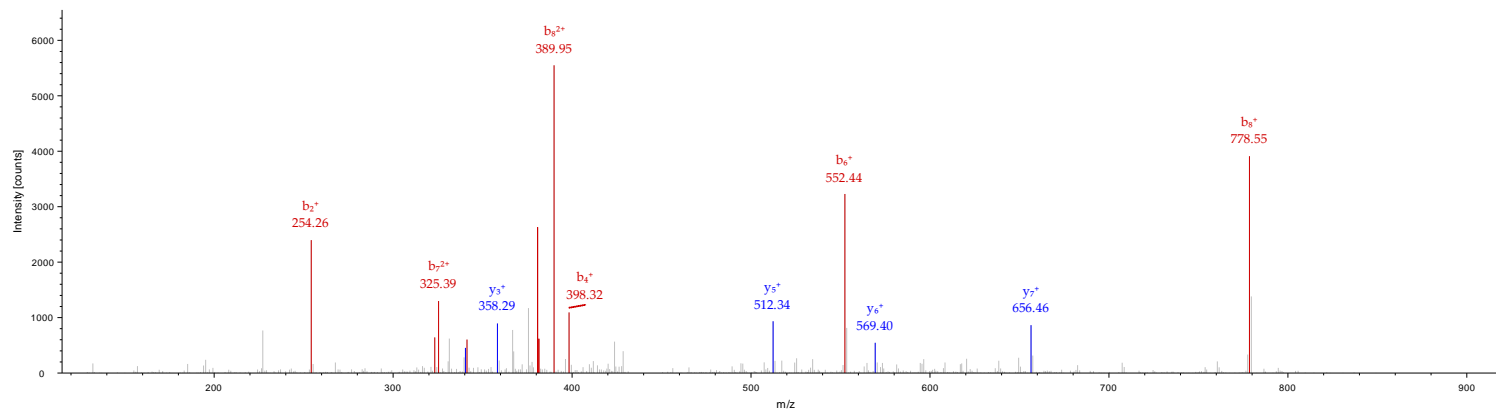

unlabeled

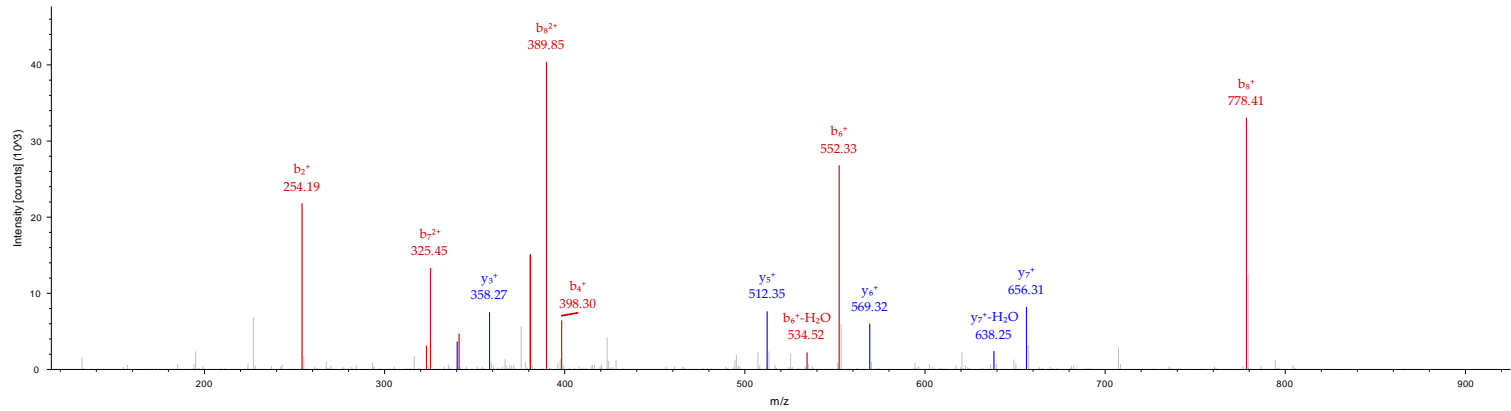

labeled

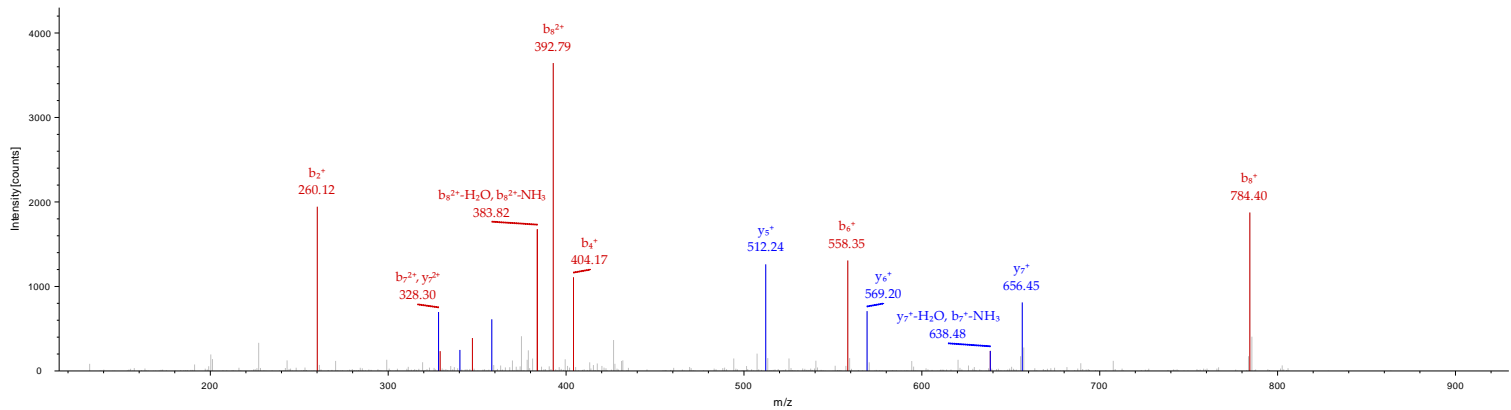

YLLPAIVHI

# Replicate 1

unlabeled

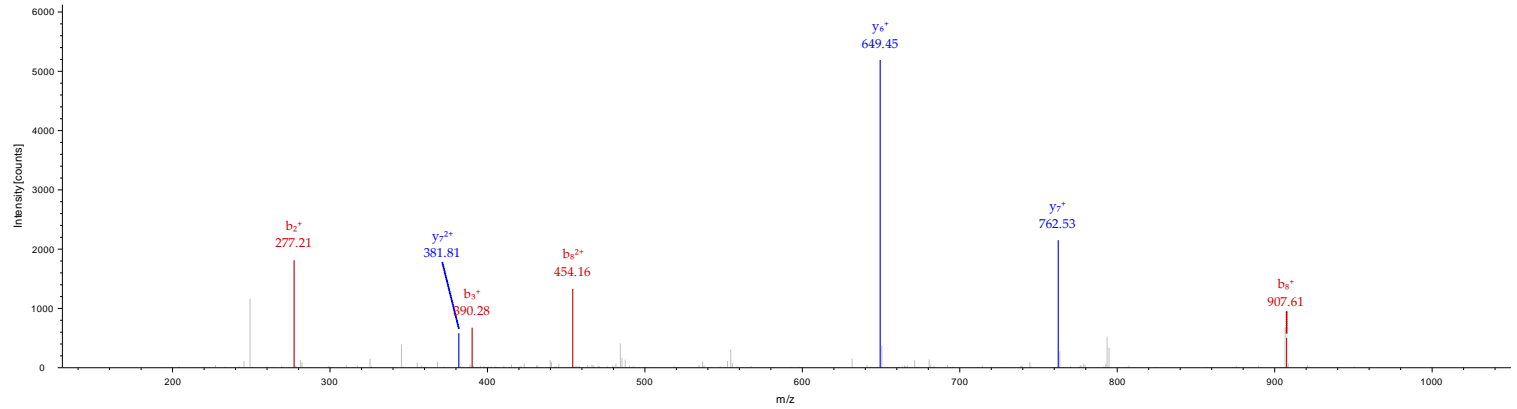

# Replicate 2

unlabeled

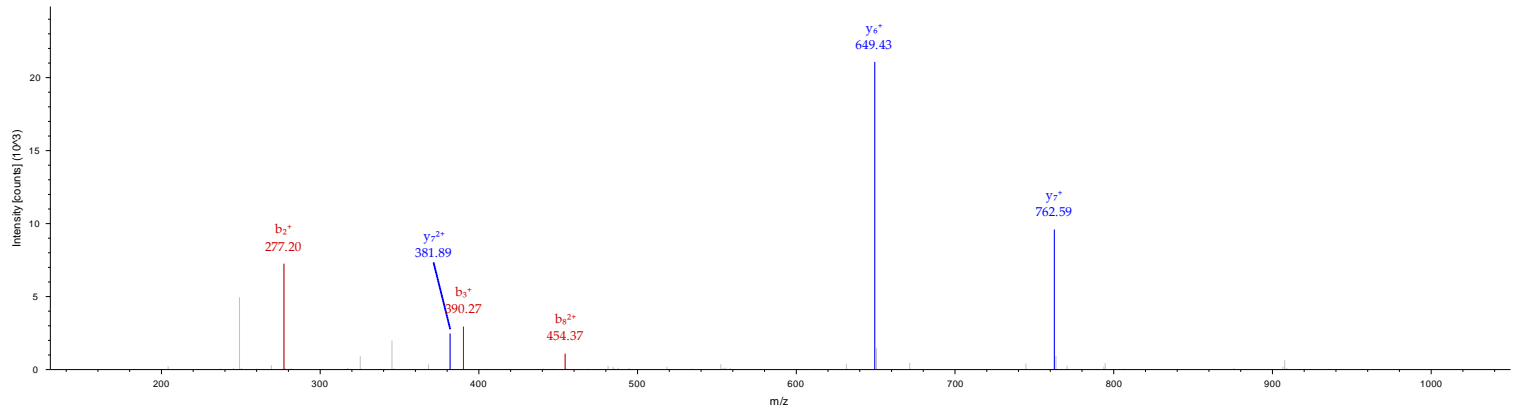

YLLPAIVHI

# Replicate 3

unlabeled

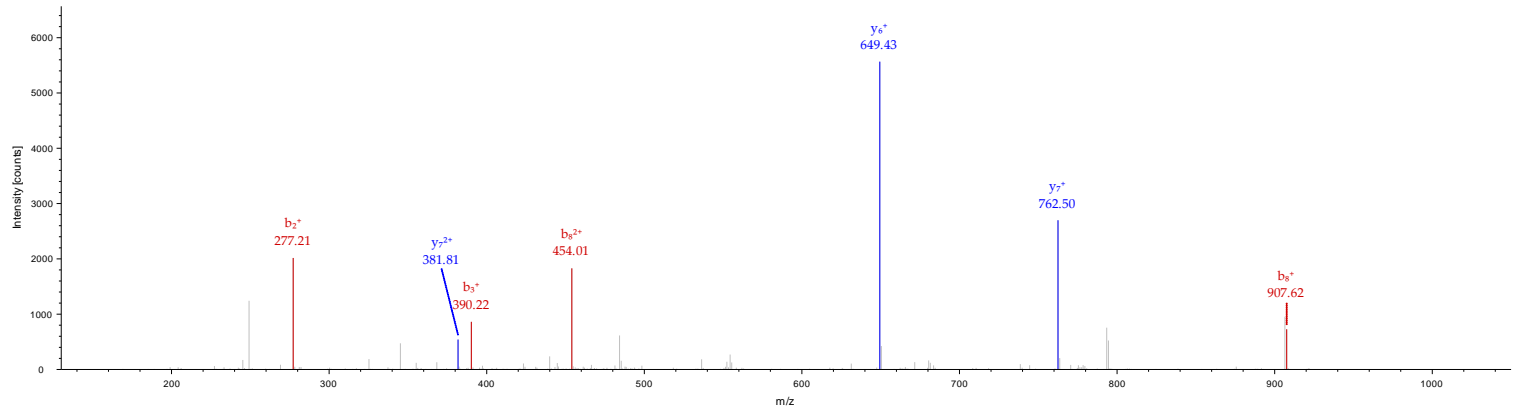

labeled

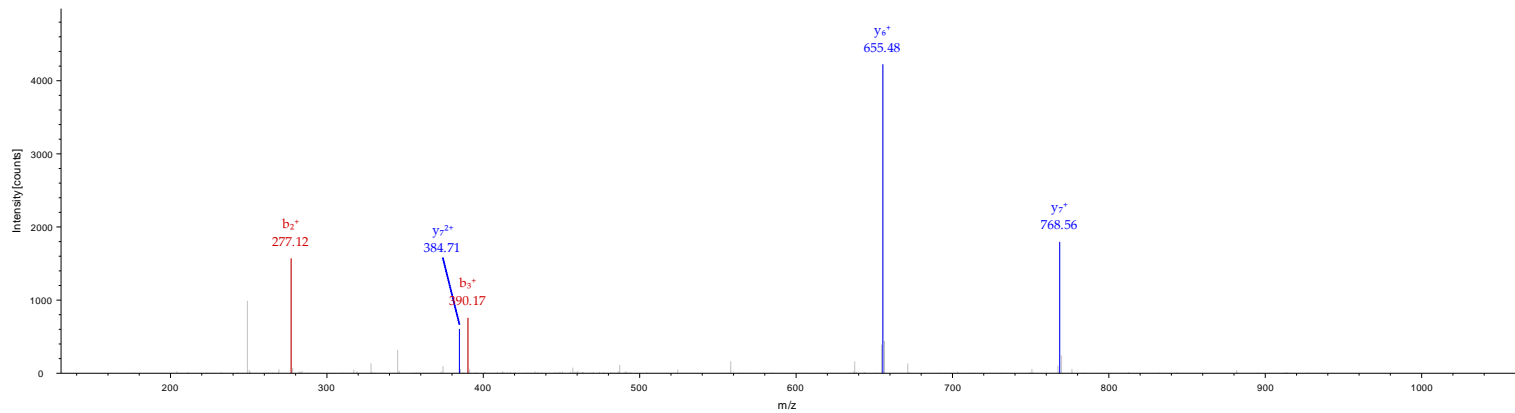

KVLEYVIKV

# Replicate 1

unlabeled

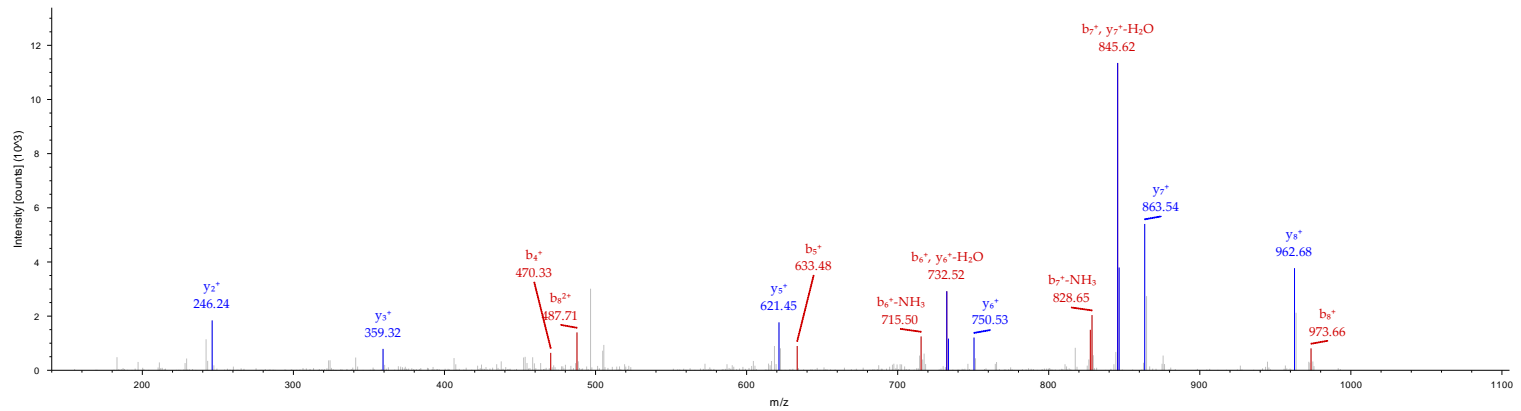

# Replicate 2

unlabeled

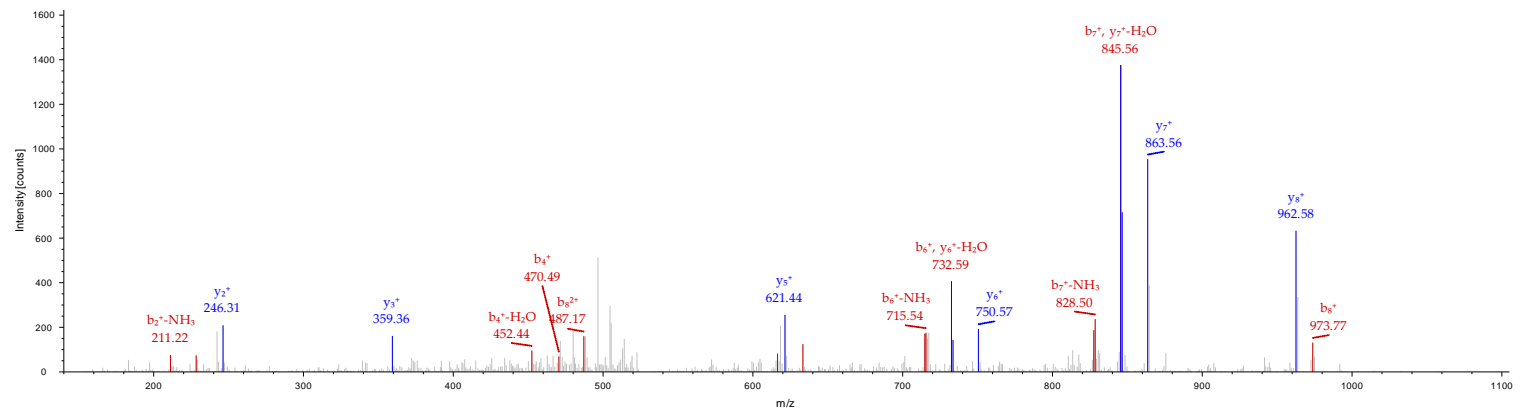

KVLEYVIKV

# Replicate 3

unlabeled

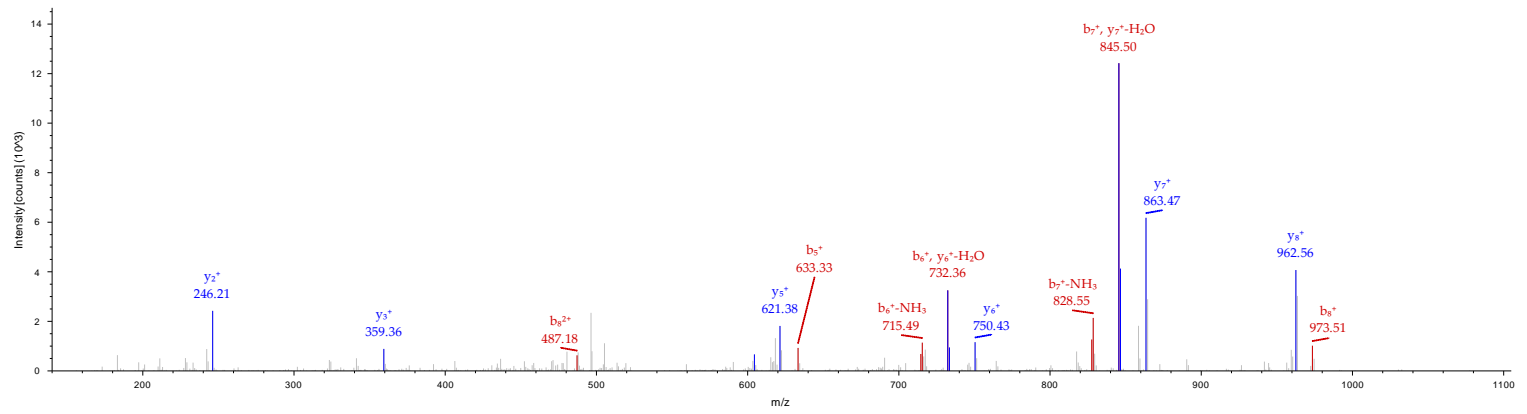

labeled

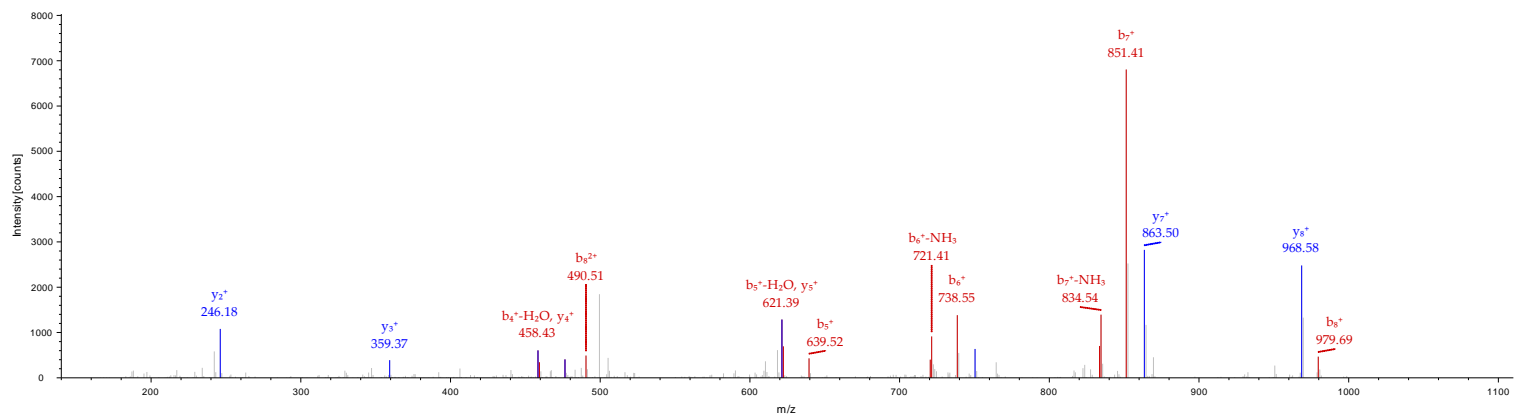



## Replicate 1

unlabeled

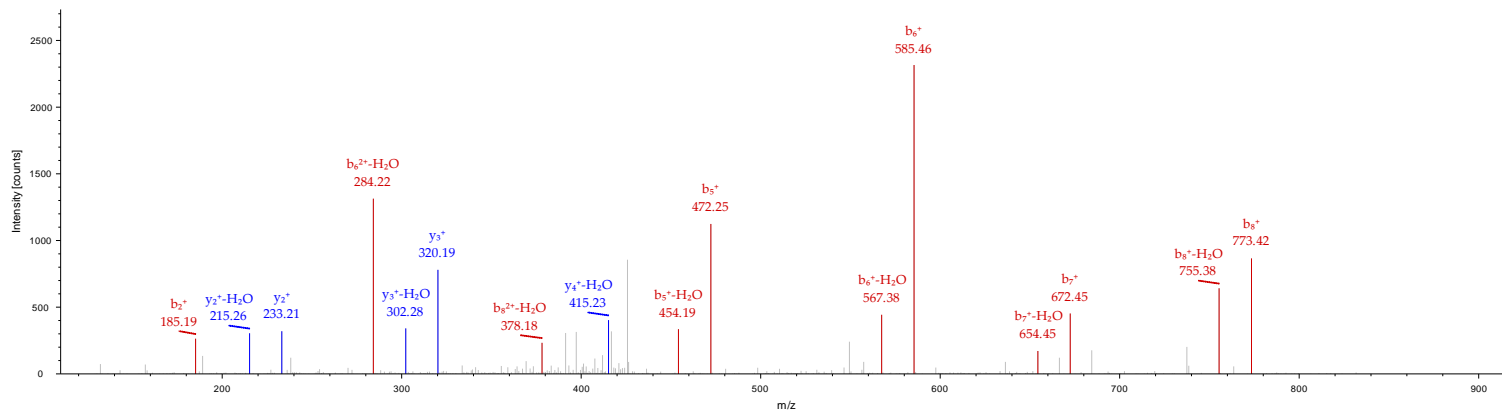

## Replicate 2

unlabeled

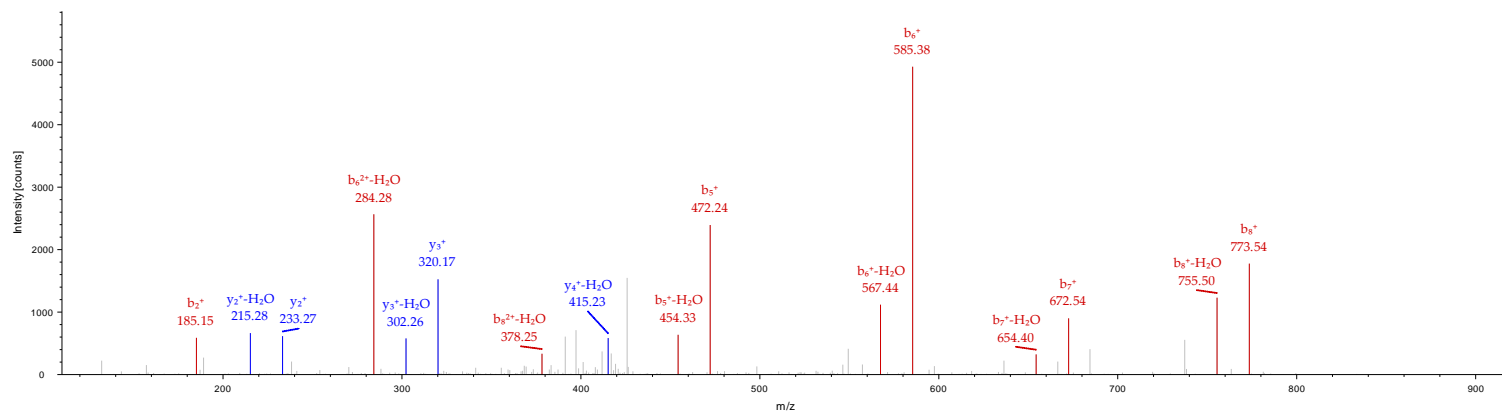

unlabeled

n/a

labeled

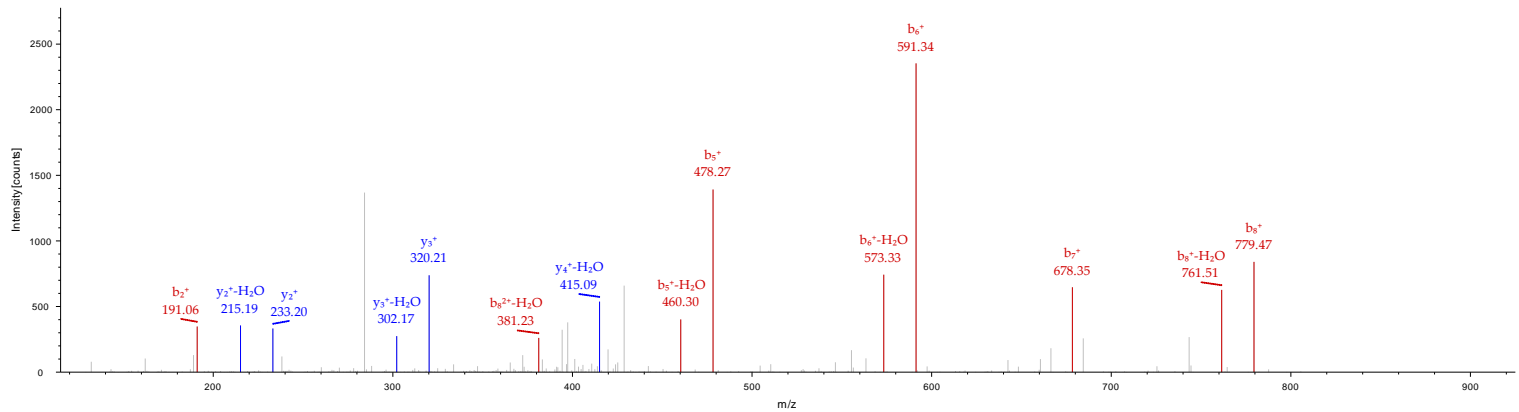

Supplement: 154045_2_supp_455921_q3txy1.pdf [file 154045_2_supp_455921_q3txy1.pdf]
