# Supplementary material
Source: PubMed Central journal article supplement (PMC7050110)
Supplement: 154045_2_supp_455919_q3txy1.pdf [file 154045_2_supp_455919_q3txy1.pdf]

labeled

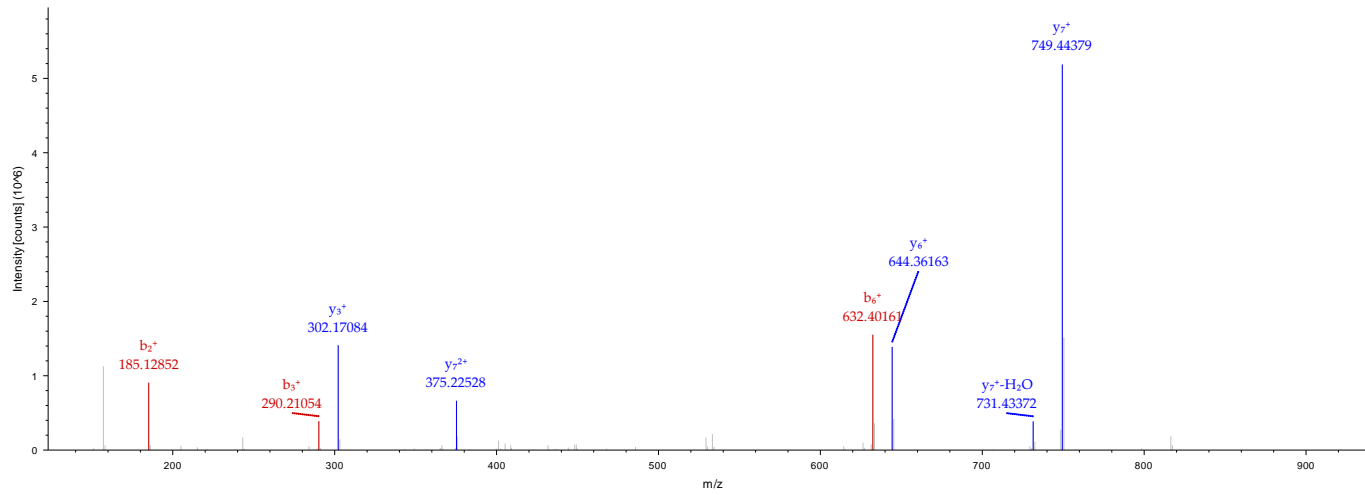

unlabeled

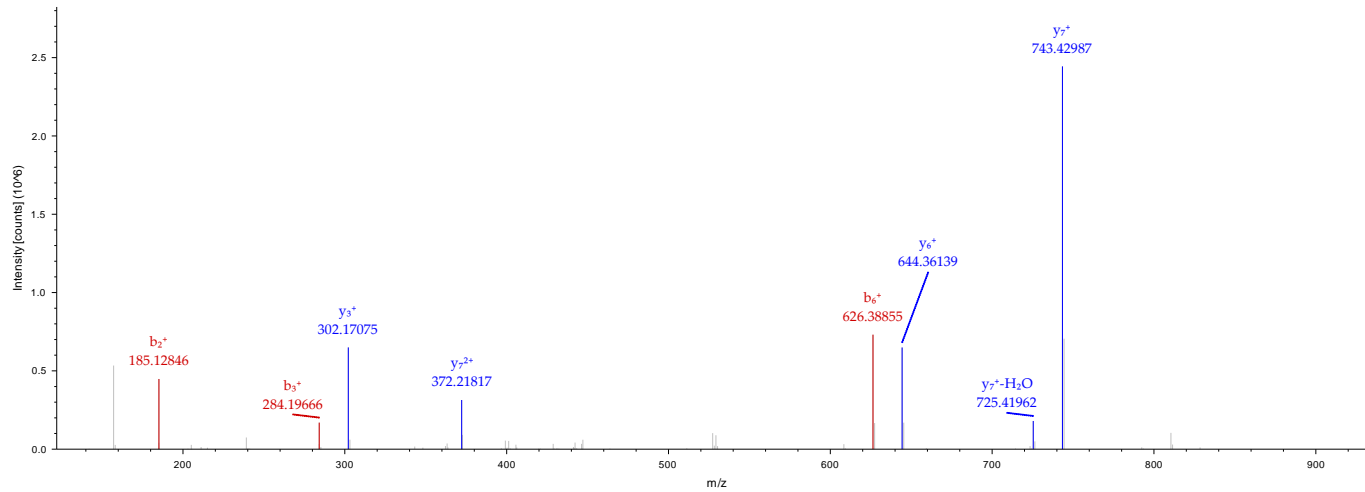

labeled

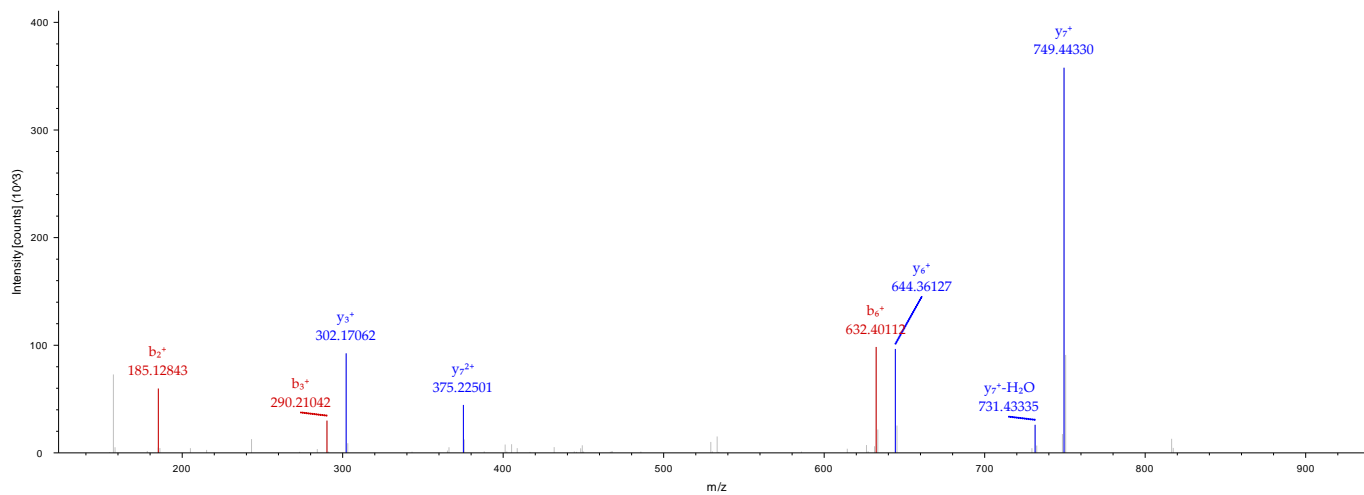

unlabeled

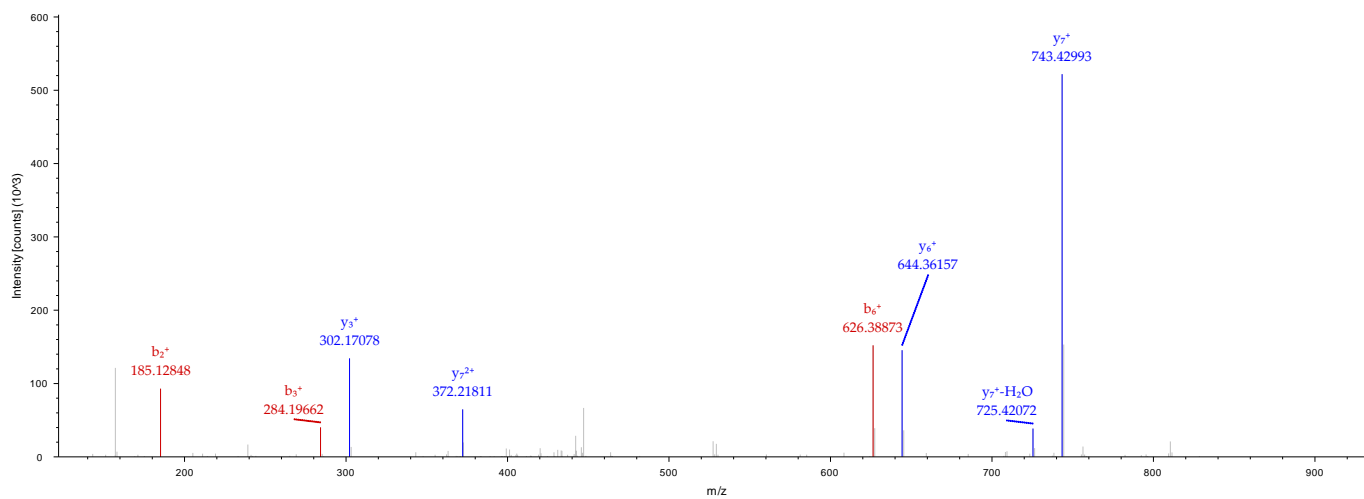

labeled

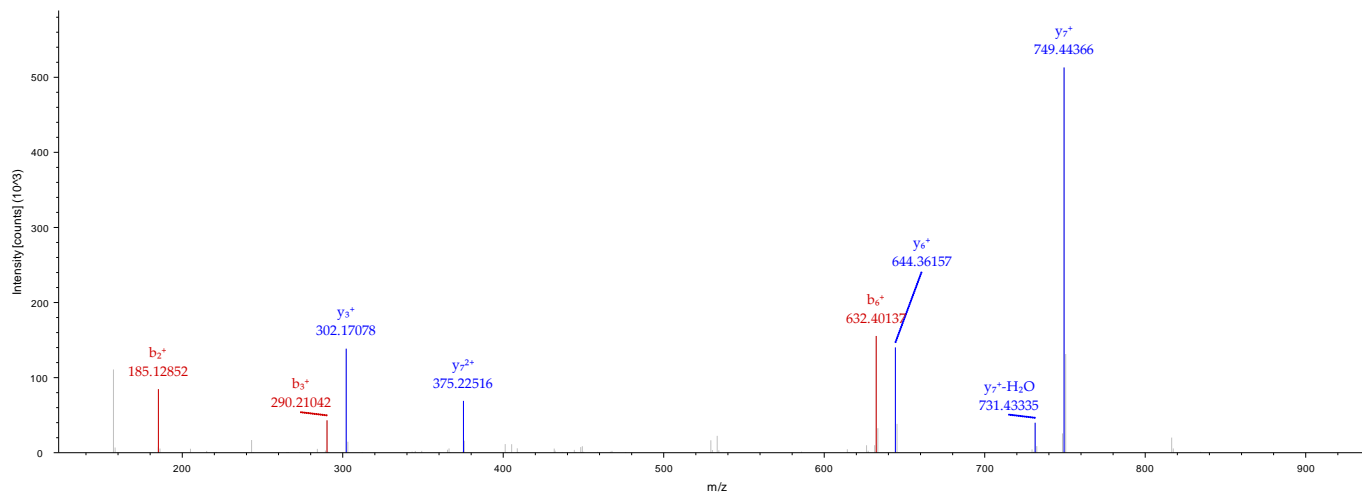

unlabeled

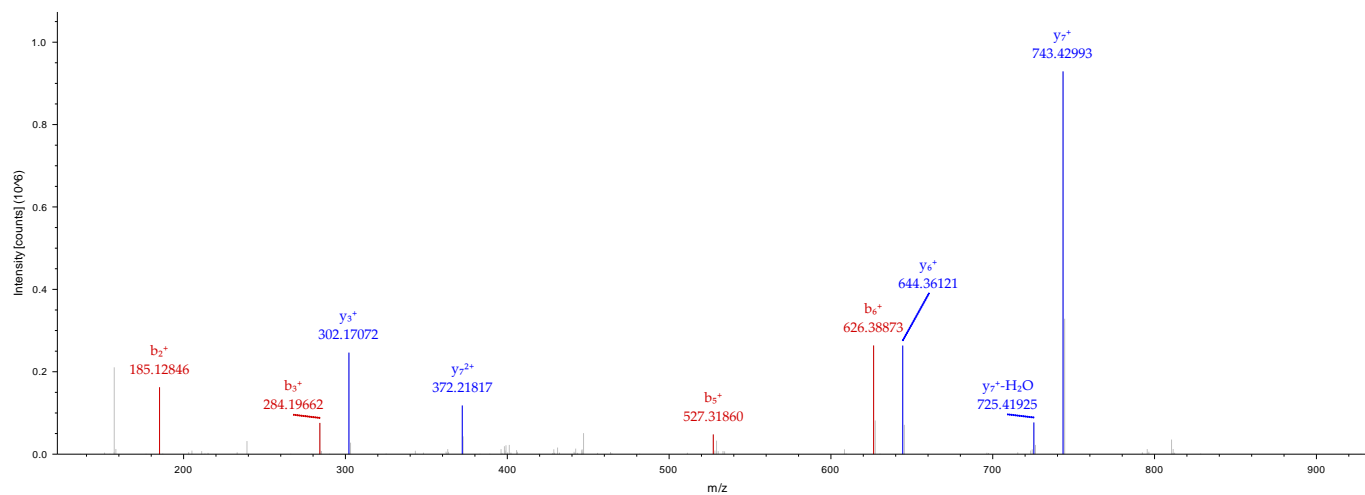

labeled

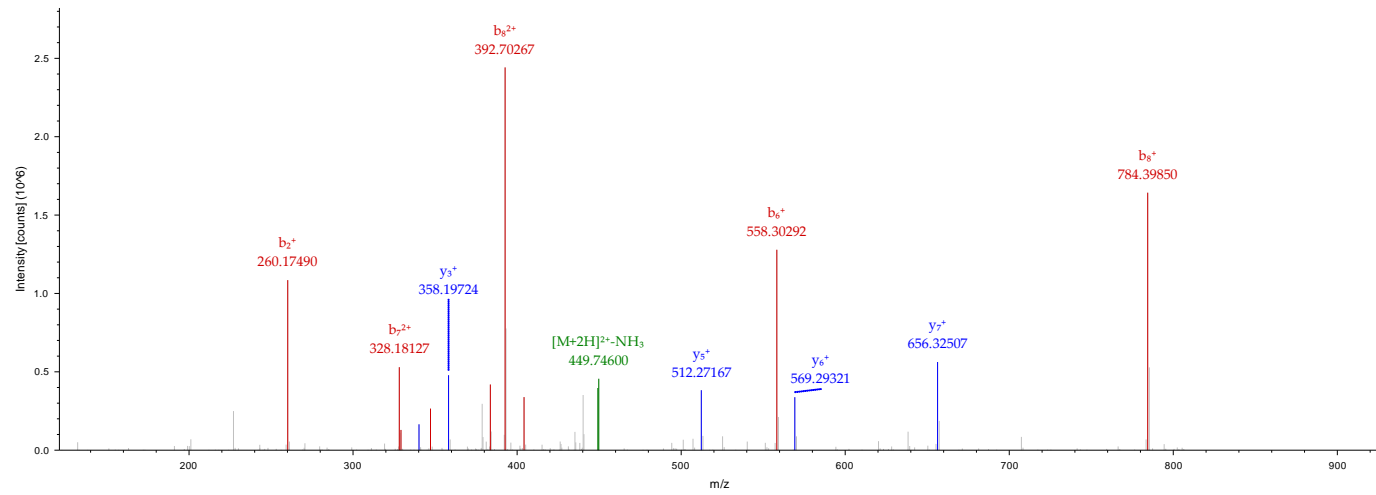

unlabeled

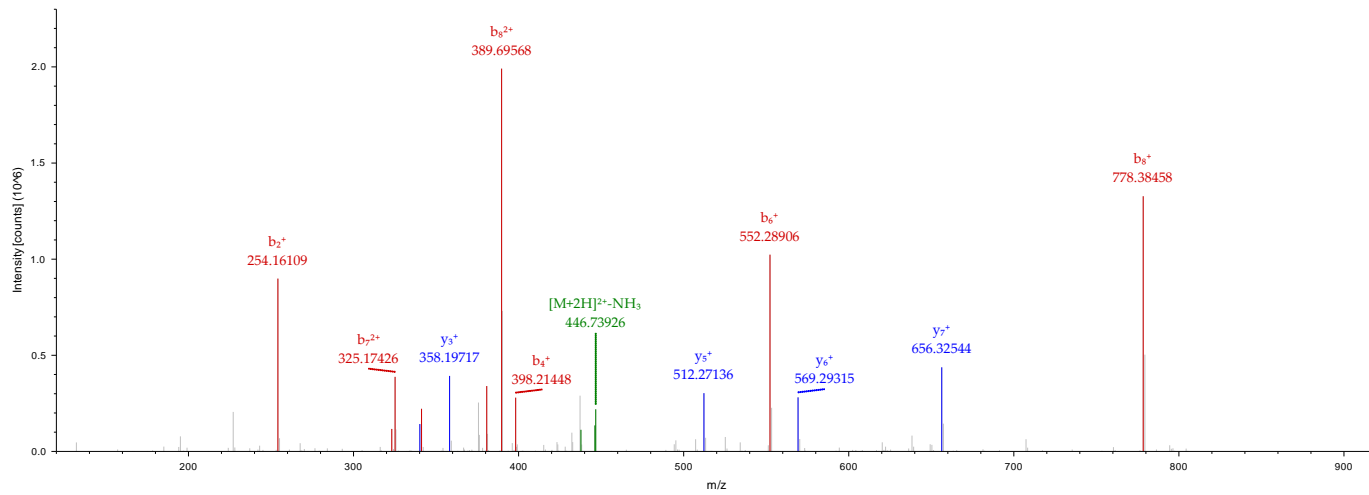

labeled

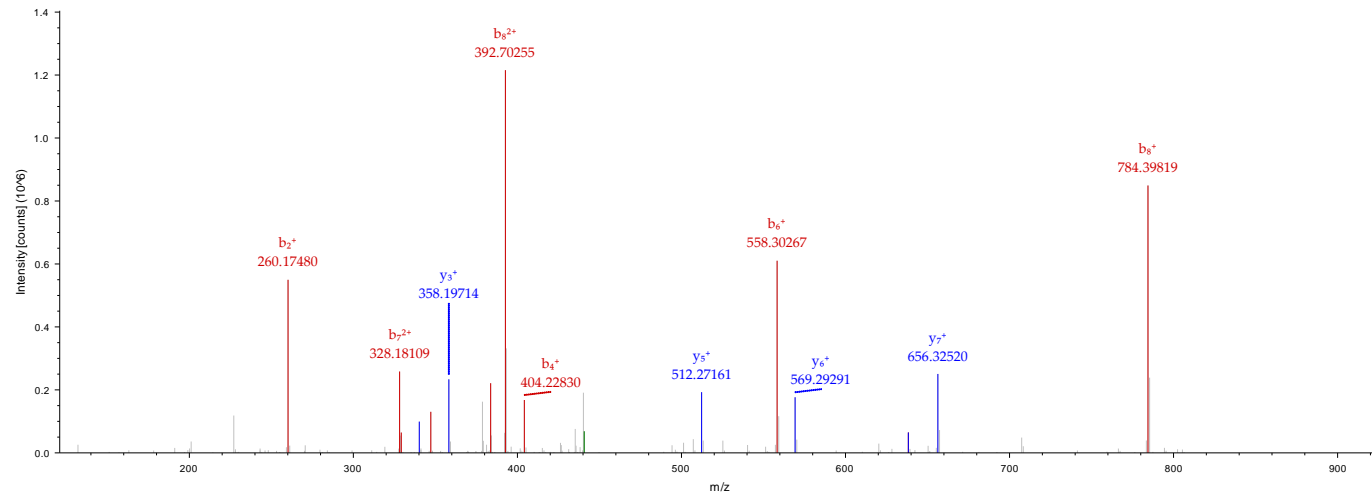

unlabeled

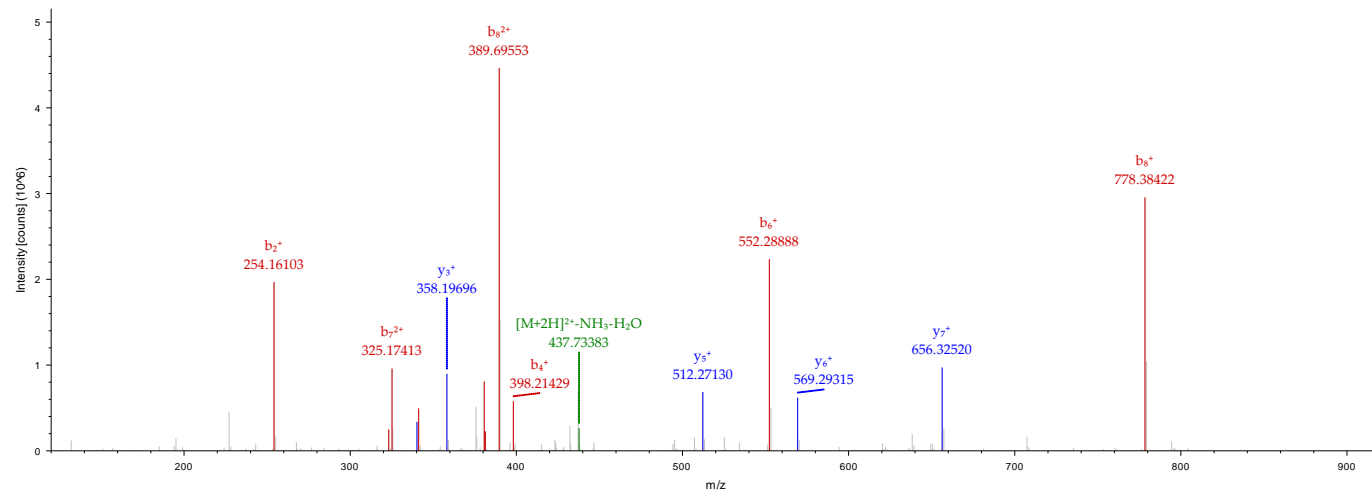

labeled

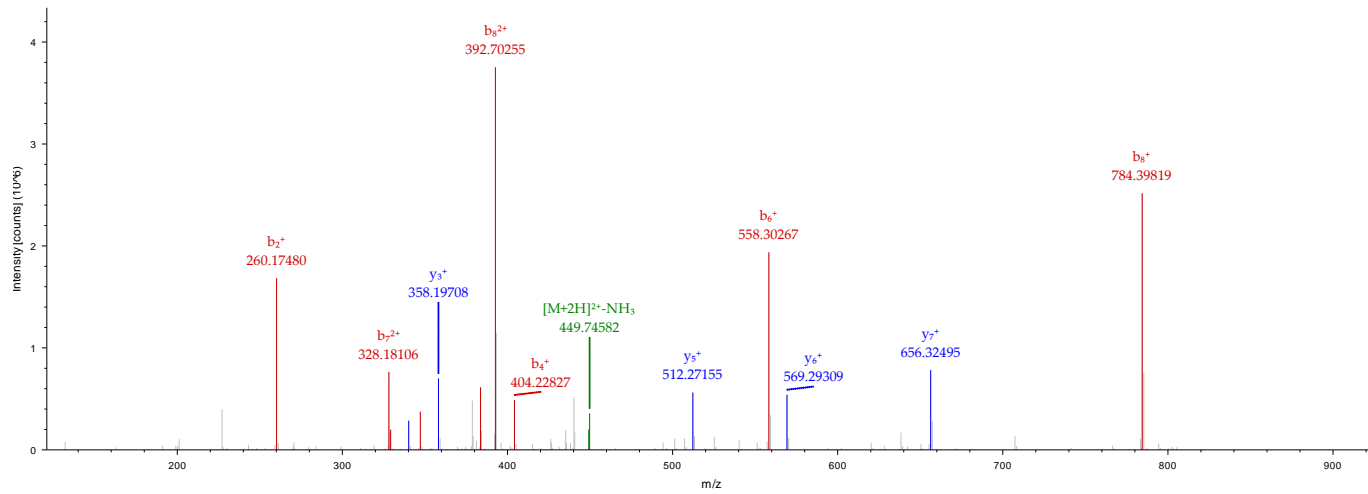

unlabeled

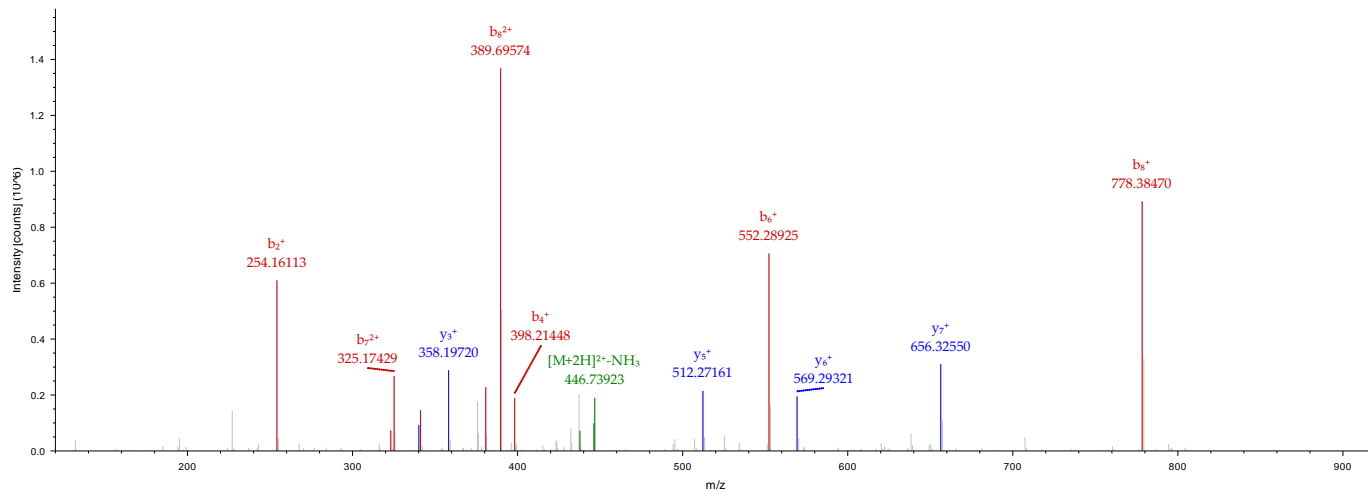

YLLPAIVHI

# Replicate 1

labeled

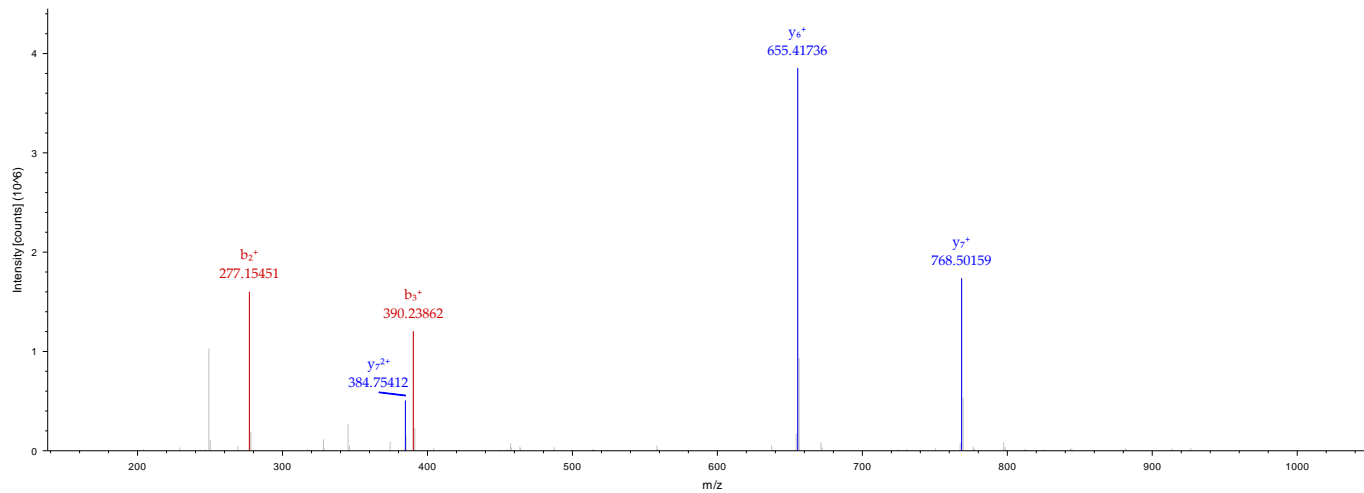

unlabeled

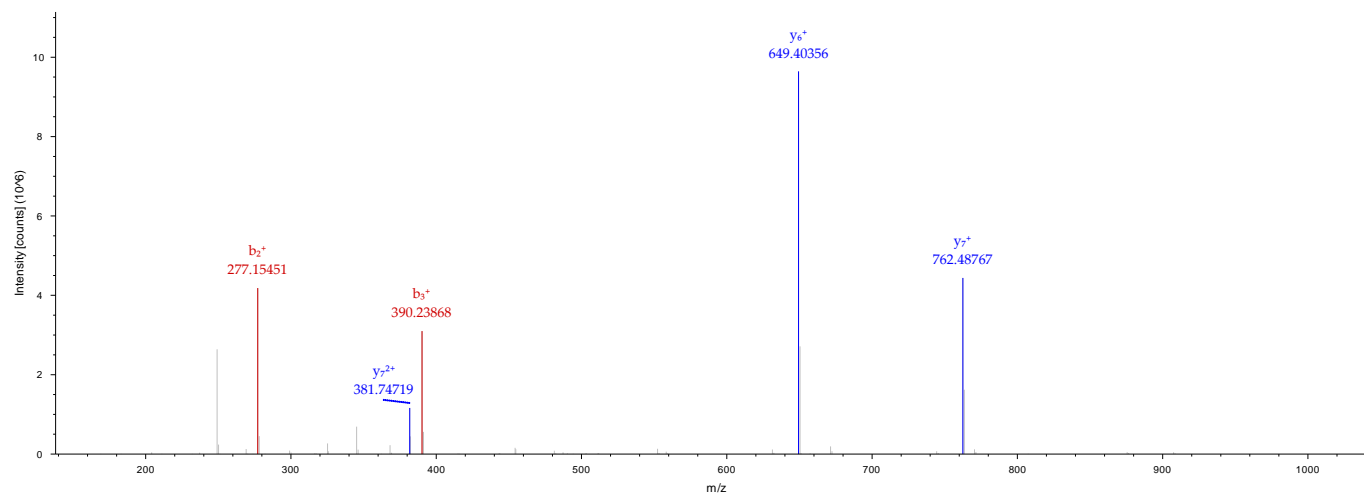

YLLPAIVHI

# Replicate 2

labeled

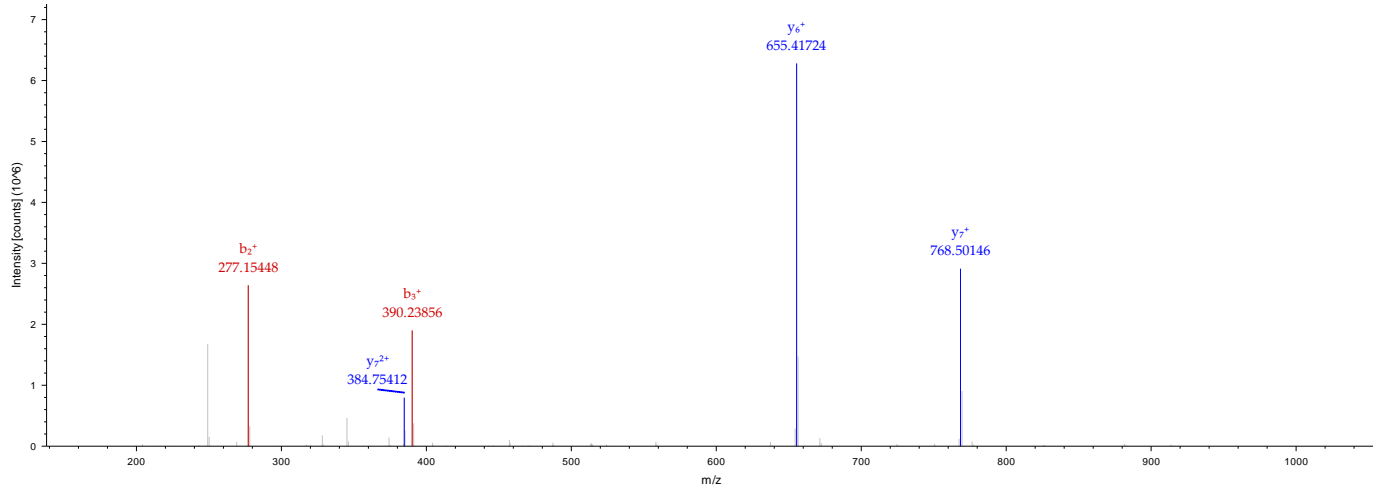

unlabeled

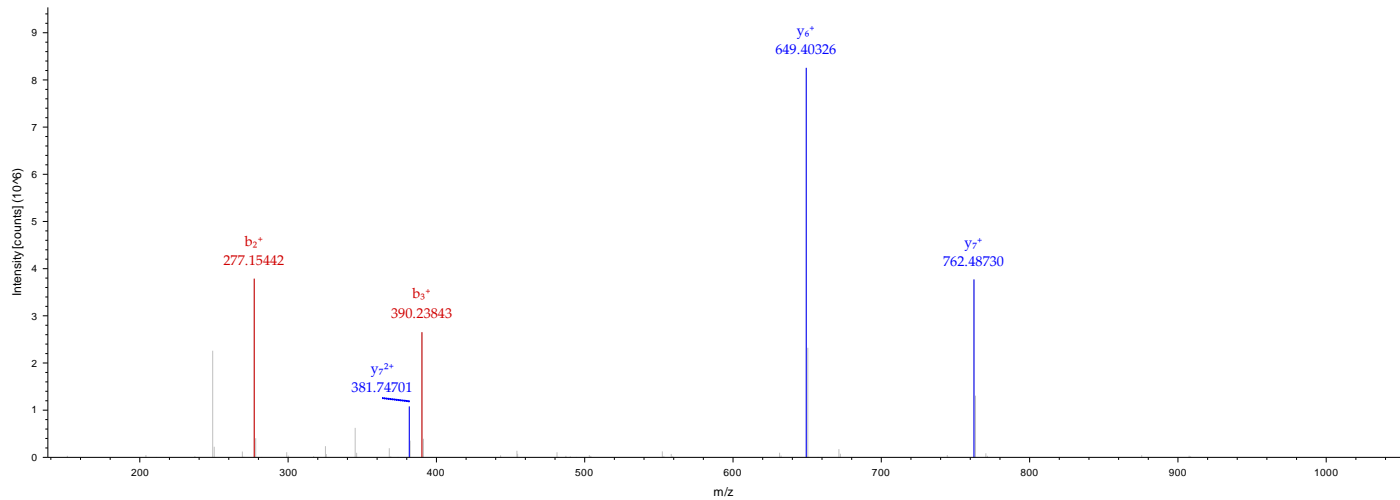



YLLPAIVHI

# Replicate 3

labeled

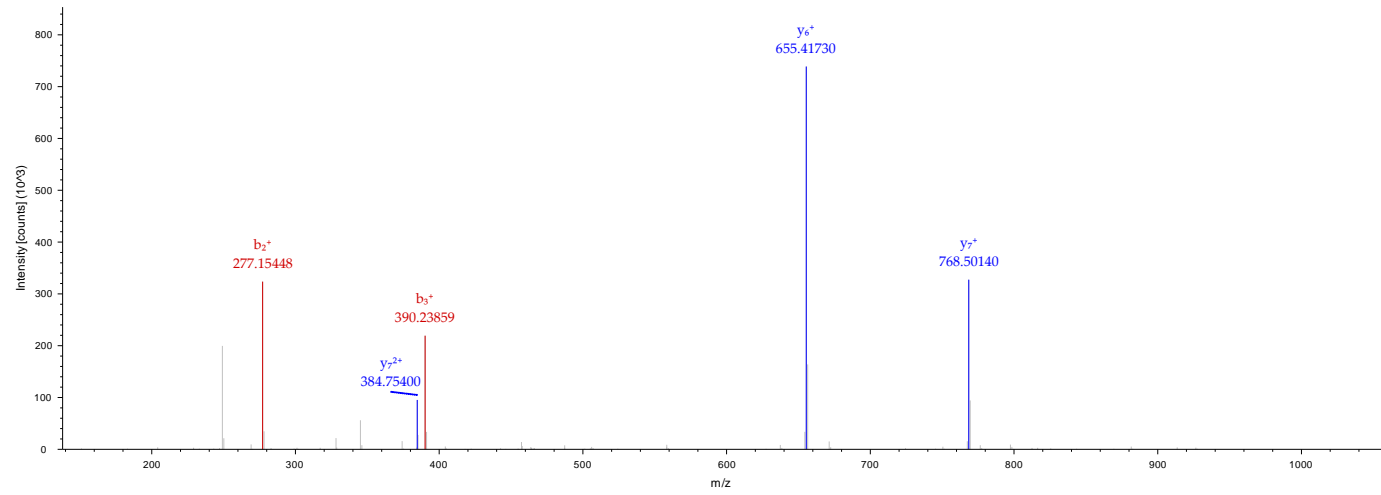

unlabeled

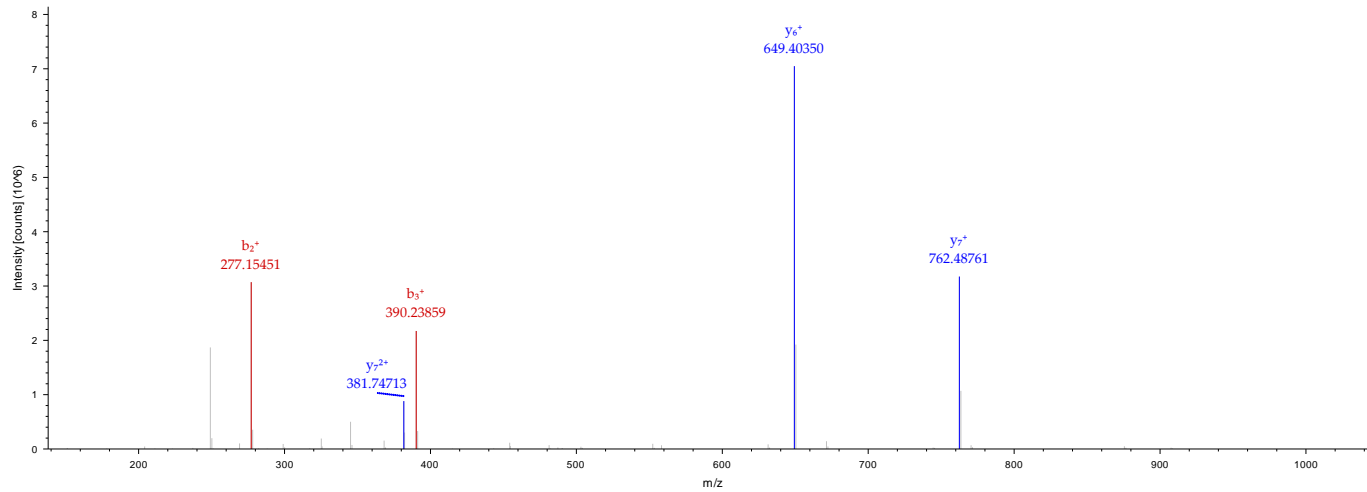

KVLEYVIKV

# Replicate 1

labeled

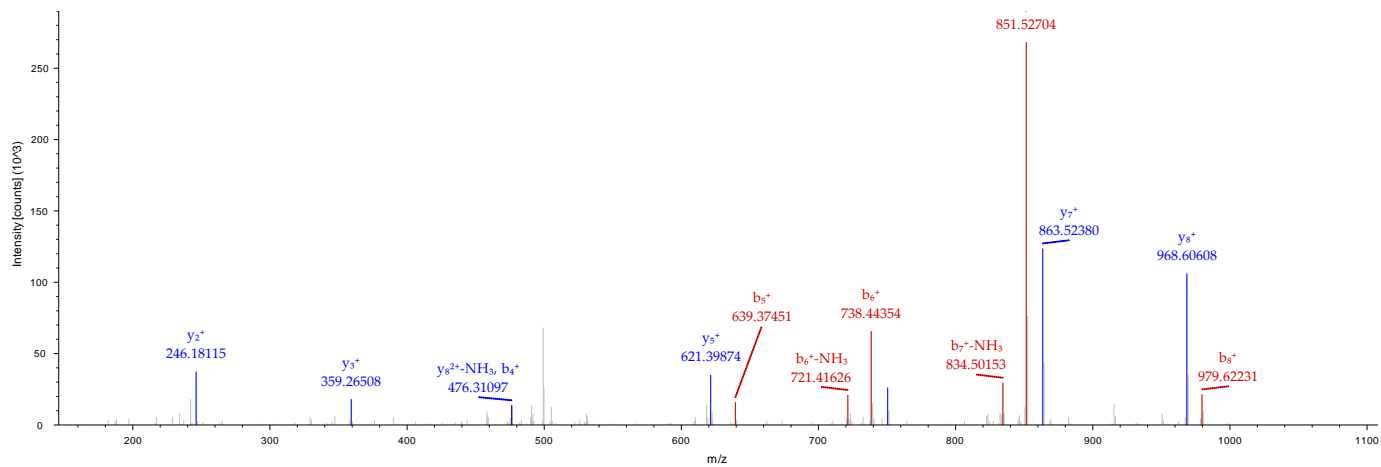

unlabeled

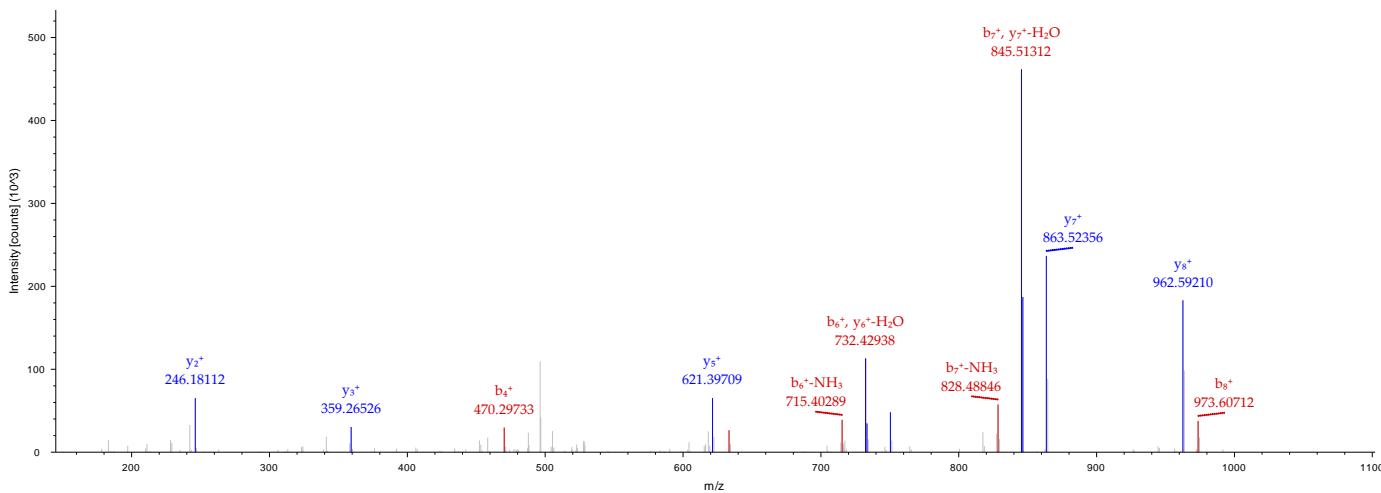

KVLEYVIKV

# Replicate 2

labeled

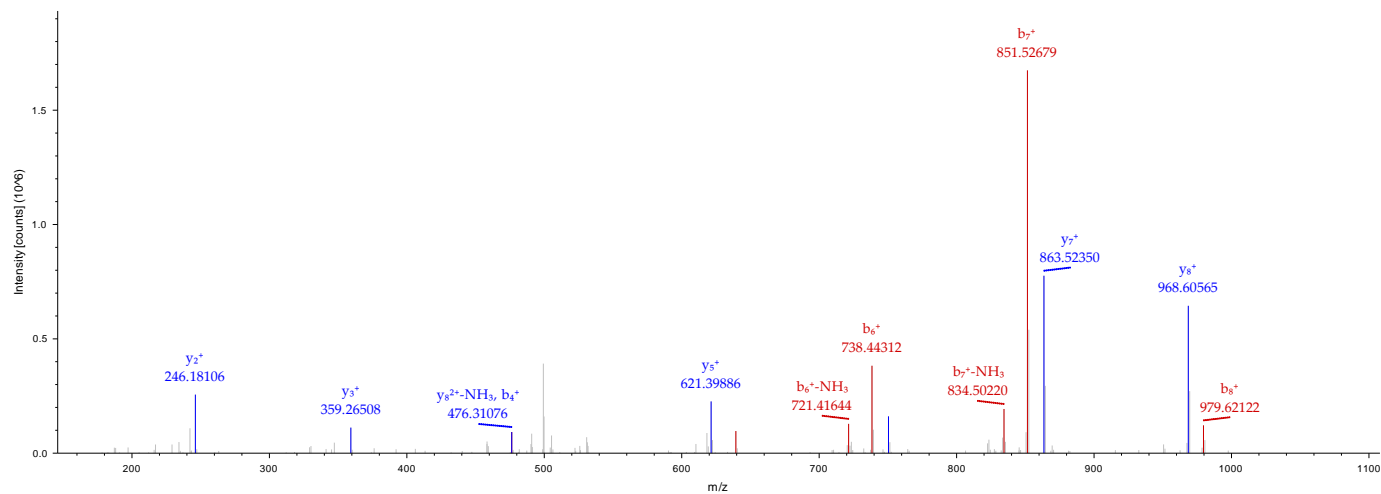

unlabeled

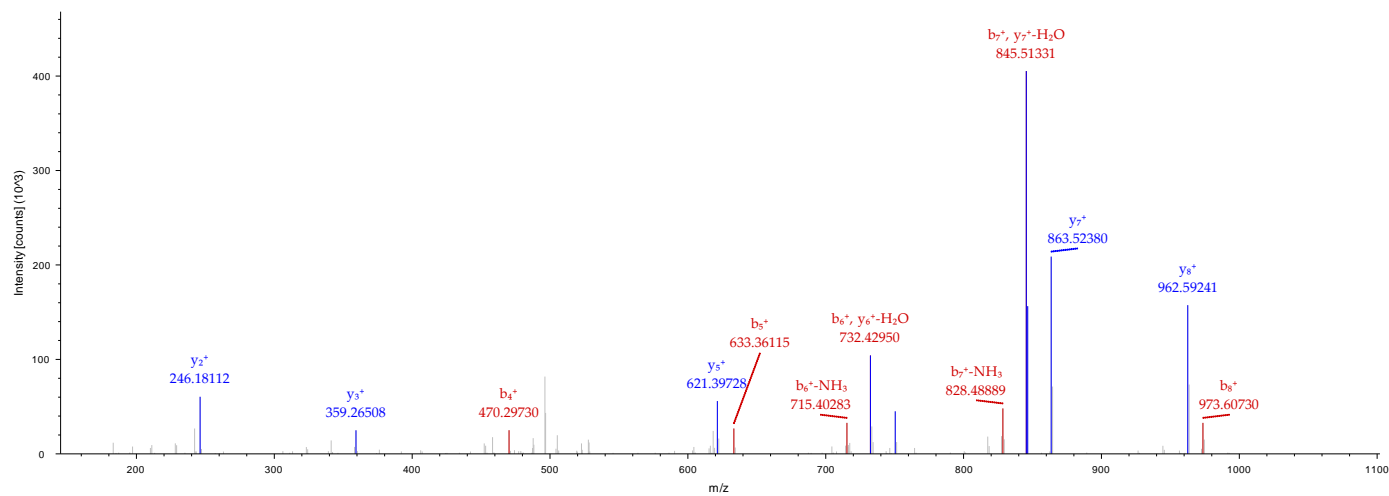

KVLEYVIKV

# Replicate 3

labeled

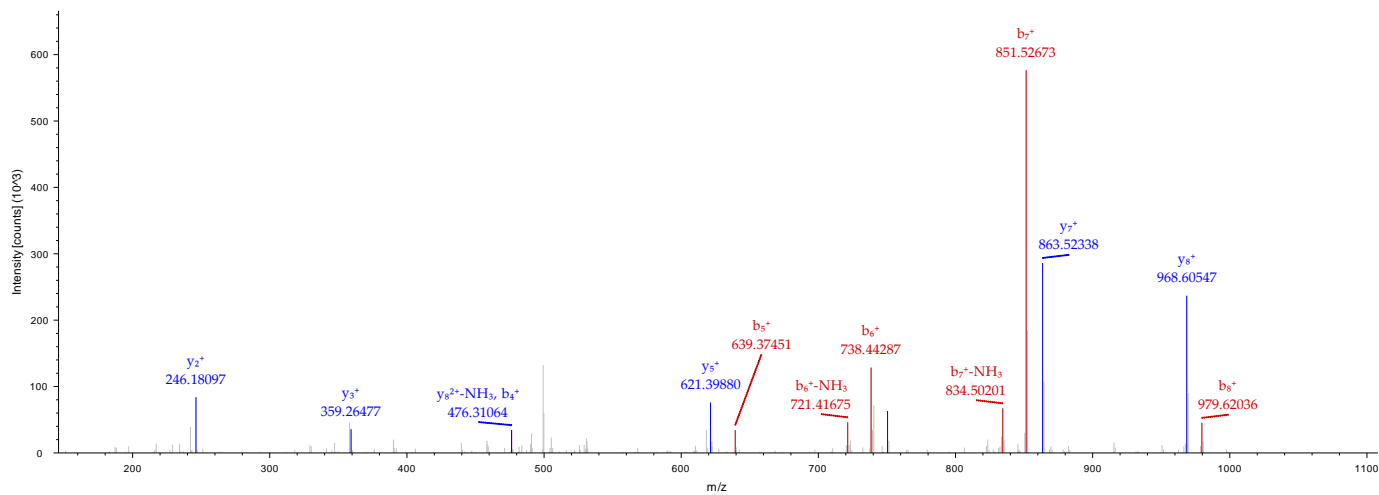

unlabeled

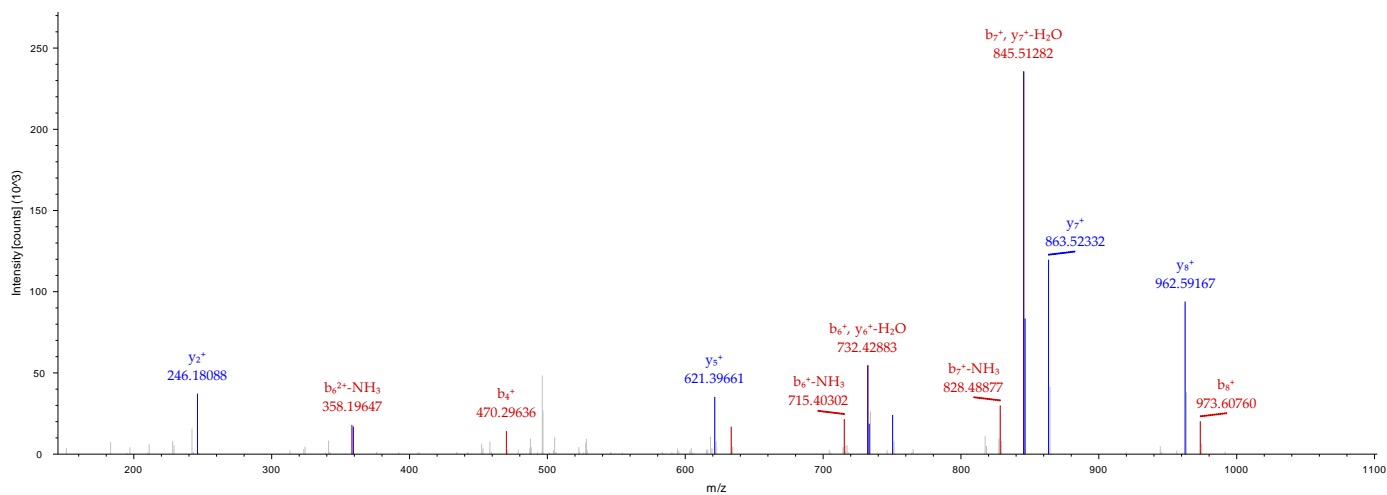

## Replicate 1

labeled

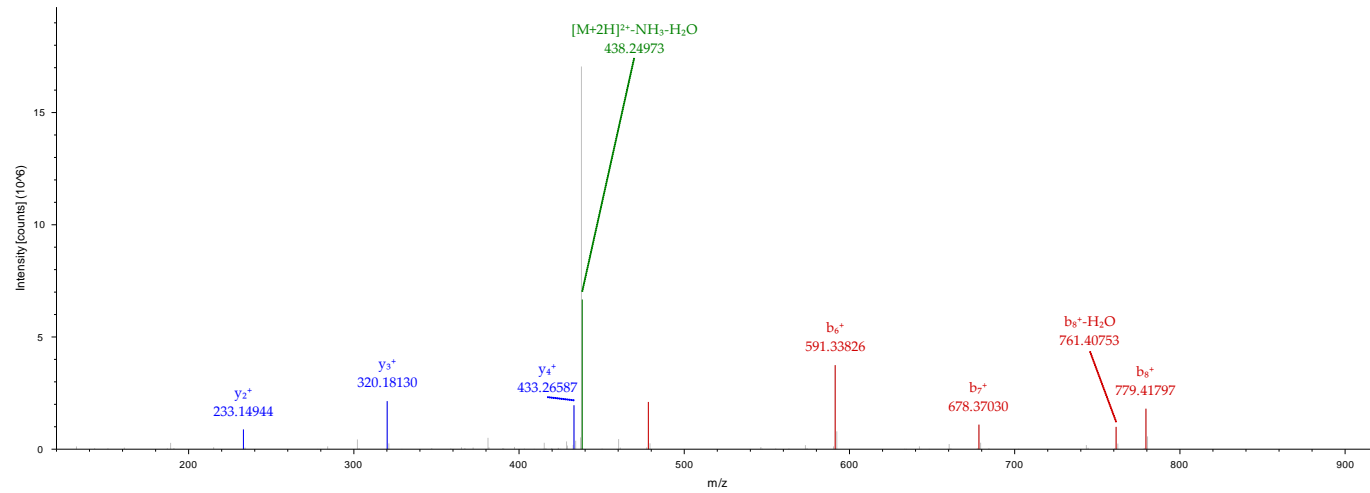

unlabeled

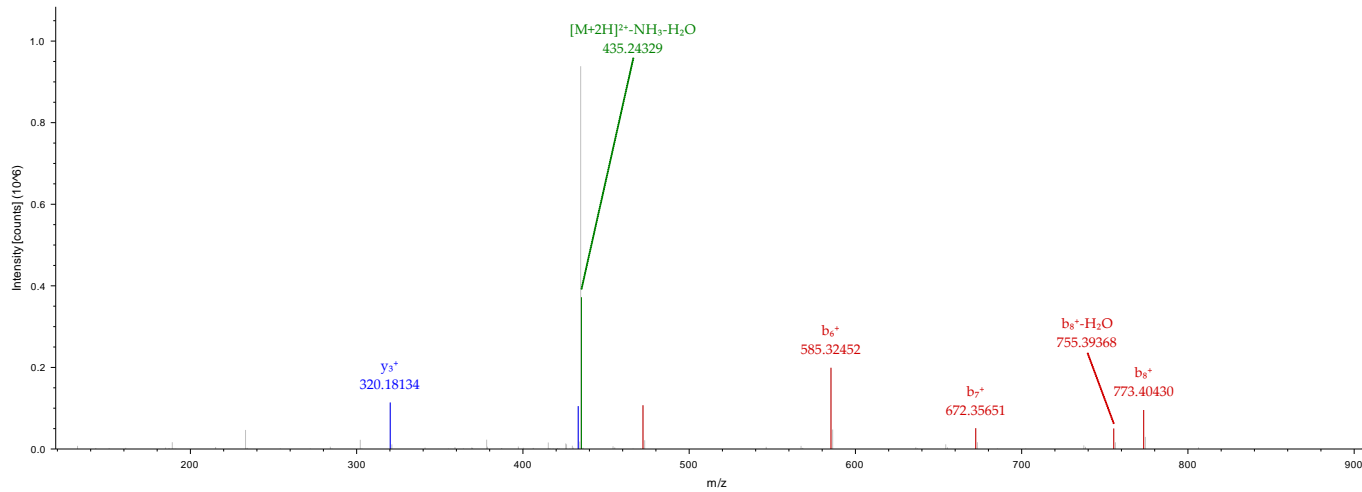

## Replicate 2

labeled

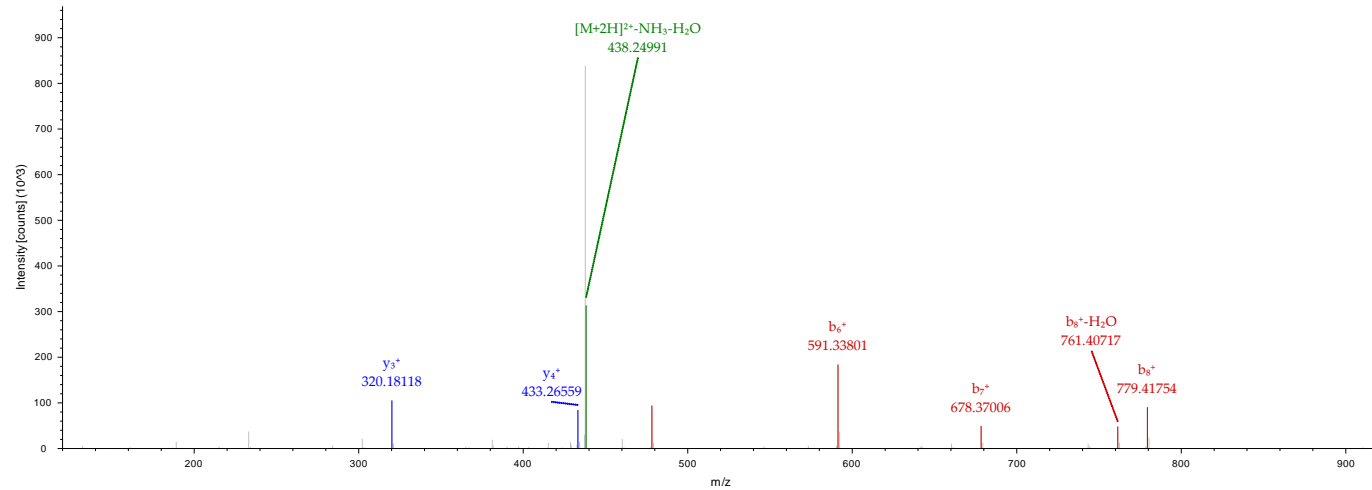

unlabeled

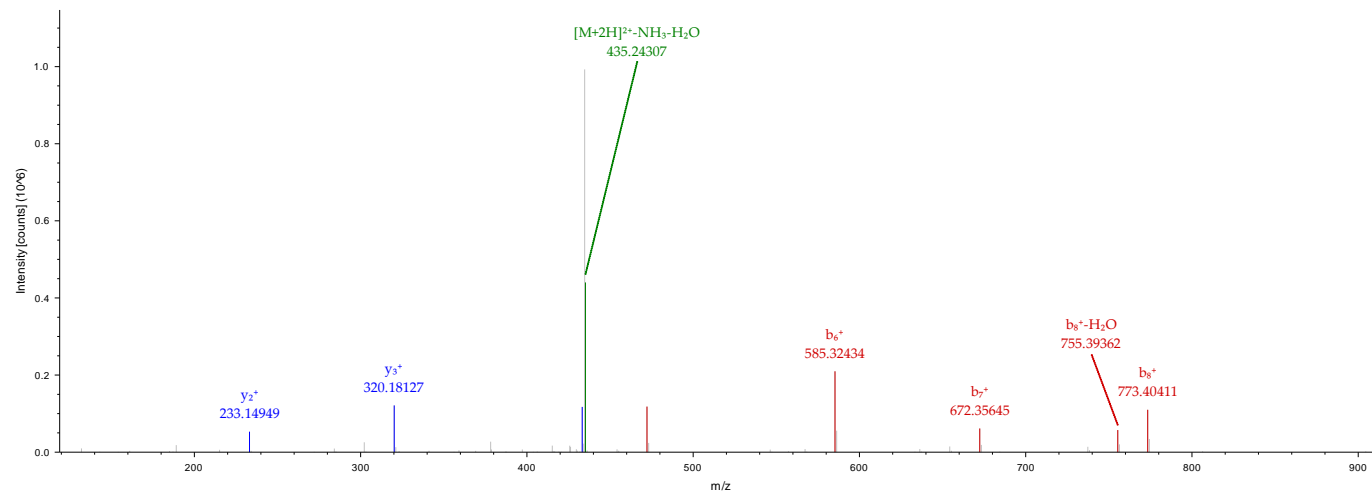

## Replicate 3

labeled

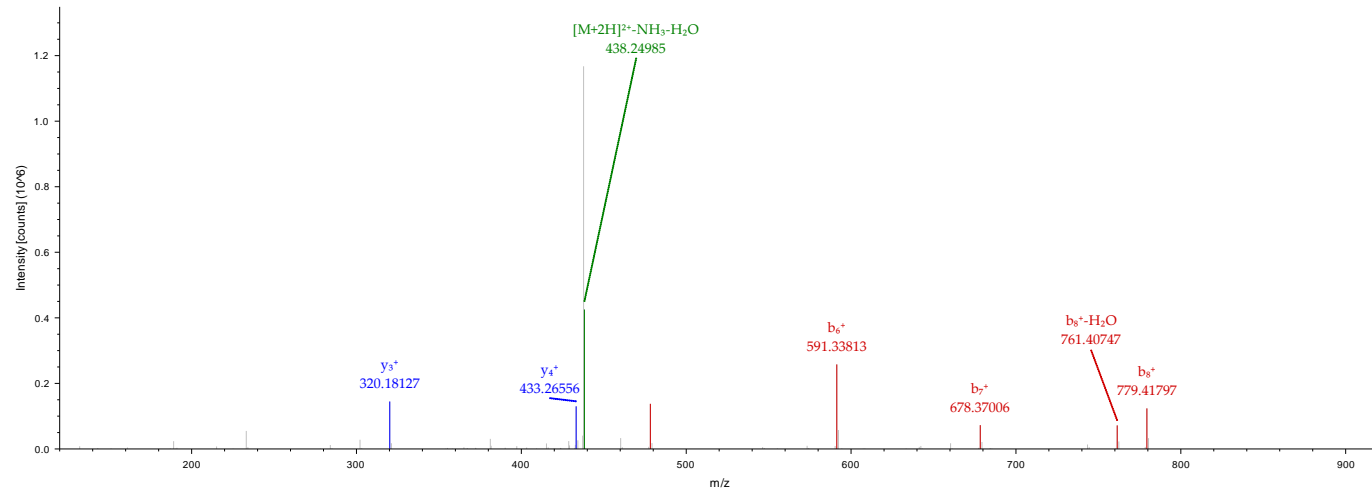

unlabeled

n/a
