# Supplementary material
Source: PubMed Central journal article supplement (PMC7050110)
Supplement: 154045_2_supp_455923_q3txy1.pdf [file 154045_2_supp_455923_q3txy1.pdf]

**Supplemental Table S1:**

---

| <b>Batch</b> | <b>Sequence</b> | <b>Molecular weight</b> | <b>pI</b> | <b>GRAVY</b> |
|--------------|-----------------|-------------------------|-----------|--------------|
| 174121       | DGPSSAPATPTK    | 1,128.20                | 5.84      | -1.00        |
| 174013       | SLNSNVYDV       | 1,010.07                | 3.80      | -0.13        |
| 174014       | FPHLPGKTFVY     | 1,305.54                | 8.60      | 0.08         |
| 174015       | SVLTPLLLR       | 1,011.27                | 9.47      | 1.31         |
| 174085       | RYQALFHDF       | 1,196.33                | 6.74      | -0.53        |
| 174122       | GPSSAPATPTK     | 1,013.12                | 8.75      | -0.77        |
| 174123       | FPHLPGKTF       | 1,043.23                | 8.76      | -0.22        |
| 174124       | FLLPAGWIL       | 1,029.29                | 5.52      | 1.96         |
| 174125       | LLPAGWIL        | 882.11                  | 5.52      | 1.85         |
| 174126       | TPLLLRGL        | 882.11                  | 9.41      | 1.00         |
| 174017       | AIVDKVPSV       | 927.11                  | 5.88      | 1.01         |
| 174018       | YLLPAIVHI       | 1,038.30                | 6.74      | 1.83         |
| 174019       | VYVVGTAHF       | 992.14                  | 6.71      | 1.29         |
| 174020       | GTYVSSVPR       | 965.07                  | 8.75      | -0.19        |
| 174021       | TYQEVAQKF       | 1,113.24                | 5.66      | -0.84        |
| 174022       | SPQGRVMTI       | 988.17                  | 9.47      | -0.10        |
| 174086       | ITDSAGHILY      | 1,089.21                | 5.08      | 0.47         |
| 174087       | RVYGGLTTK       | 994.16                  | 9.99      | -0.43        |
| 174088       | ALKTGIVAK       | 900.13                  | 10.00     | 0.80         |
| 174089       | SVLNLVIVK       | 984.25                  | 8.47      | 1.83         |
| 174090       | DLIIKGISV       | 957.18                  | 5.84      | 1.43         |
| 174127       | NTDSPLRY        | 965.03                  | 5.84      | -1.51        |
| 174128       | RPSGPGPEL       | 909.01                  | 6.00      | -1.18        |

---

---

| <b>Batch</b> | <b>Sequence</b> | <b>Molecular weight</b> | <b>pI</b> | <b>GRAVY</b> |
|--------------|-----------------|-------------------------|-----------|--------------|
| 174023       | DLKEKKEVV       | 1,087.28                | 6.18      | -1.11        |
| 174024       | TLHDQVHLL       | 1,075.23                | 5.90      | 0.17         |
| 174061       | NVGGLIGTPK      | 955.12                  | 8.75      | 0.16         |
| 174062       | FYFPTPTVL       | 1,084.28                | 5.52      | 0.86         |
| 174063       | RSYHLQIVTK      | 1,244.46                | 9.99      | -0.54        |
| 174064       | NPKAFFSVL       | 1,022.21                | 8.75      | 0.62         |
| 174065       | NPSVREFVL       | 1,060.22                | 6.00      | 0.12         |
| 174066       | VLVDQSWVL       | 1,058.24                | 3.80      | 1.28         |
| 174068       | APDAKSFVL       | 947.10                  | 5.88      | 0.51         |
| 174069       | KVLEYVIKV       | 1,090.37                | 8.50      | 0.92         |
| 174070       | GVYDGREHTV      | 1,132.20                | 5.32      | -0.91        |
| 174071       | KVLEHVVRV       | 1,078.32                | 8.75      | 0.61         |
| 174072       | ALDEKVAEL       | 987.12                  | 4.14      | 0.11         |
| 174073       | GVYDGEEHSV      | 1,091.10                | 4.13      | -0.82        |
| 174074       | FVYGEPREL       | 1,109.25                | 4.53      | -0.44        |
| 174075       | NAVGVYAGR       | 906.01                  | 8.75      | 0.21         |
| 174076       | VWSDVTPLTF      | 1,164.32                | 3.80      | 0.68         |
| 174077       | AVLPLTVAEVQK    | 1,267.53                | 6.05      | 0.88         |
| 174078       | RVRELAVAL       | 1,026.25                | 9.60      | 0.79         |
| 174079       | HLTEVYPEL       | 1,100.24                | 4.51      | -0.22        |
| 174080       | SVLADLVTTK      | 1,046.23                | 5.55      | 0.82         |
| 174081       | IPFSNPRVL       | 1,042.25                | 9.75      | 0.37         |
| 174082       | VLYGPAGLGK      | 974.17                  | 8.56      | 0.56         |
| 174083       | SPSVSQLSVL      | 1,016.16                | 5.24      | 0.77         |

---

---

| <b>Batch</b> | <b>Sequence</b> | <b>Molecular weight</b> | <b>pI</b> | <b>GRAVY</b> |
|--------------|-----------------|-------------------------|-----------|--------------|
| 174084       | VLYPVPLESY      | 1,179.38                | 4.00      | 0.59         |
| 174092       | TLLKALLEI       | 1,013.29                | 5.66      | 1.49         |
| 174093       | ALREEEEGV       | 1,031.09                | 4.09      | -1.01        |
| 174094       | SLLKFLAKV       | 1,018.31                | 10.00     | 1.29         |
| 174095       | LIHFLLLK        | 996.30                  | 8.76      | 1.93         |
| 174096       | GLYDGREHSV      | 1,132.20                | 5.32      | -0.96        |
| 174129       | LAQPPSGQR       | 953.07                  | 9.75      | -1.14        |
| 174130       | FPSLREAAL       | 1,003.17                | 6.00      | 0.40         |
| 174132       | SPSKAFASL       | 907.03                  | 8.47      | 0.26         |
| 174205       | RLLDSVSRL       | 1,058.25                | 9.60      | 0.17         |
| 174206       | TYSEKTTLF       | 1,089.21                | 5.66      | -0.56        |
| 174207       | SLLQHLLGL       | 993.21                  | 6.46      | 1.31         |
| 174208       | SPSSILSTL       | 904.03                  | 5.24      | 0.73         |
| 174210       | VLLAGFKPPL      | 1,054.34                | 8.72      | 1.27         |
| 174211       | LYLPKSWTI       | 1,120.36                | 8.59      | 0.32         |

---
