# Supplementary material
Source: PubMed Central journal article supplement (PMC7050110)
Supplement: 154045_2_supp_455924_q3txy1.pdf [file 154045_2_supp_455924_q3txy1.pdf]

**Supplemental Table S2:**

| <b>Sample</b> | <b>Purpose</b>             | <b>Condition/ number</b>           | <b>Technical replicate</b> | <b>Raw file name</b>          |
|---------------|----------------------------|------------------------------------|----------------------------|-------------------------------|
| JY cell line  | Precision                  | 1 (day 0)                          | 1                          | JY_repeatability_1_1          |
| JY cell line  | Precision                  | 1 (day 0)                          | 2                          | JY_repeatability_1_2          |
| JY cell line  | Precision                  | 1 (day 0)                          | 3                          | JY_repeatability_1_3          |
| JY cell line  | Precision                  | 2 (day 0)                          | 1                          | JY_repeatability_2_1          |
| JY cell line  | Precision                  | 2 (day 0)                          | 2                          | JY_repeatability_2_2          |
| JY cell line  | Precision                  | 2 (day 0)                          | 3                          | JY_repeatability_2_3          |
| JY cell line  | Precision                  | 3 (day 0)                          | 1                          | JY_repeatability_3_1          |
| JY cell line  | Precision                  | 3 (day 0)                          | 2                          | JY_repeatability_3_2          |
| JY cell line  | Precision                  | 3 (day 0)                          | 3                          | JY_repeatability_3_3          |
| JY cell line  | Precision                  | 1 (day 7)                          | 1                          | JY_intermediate_precision_1_1 |
| JY cell line  | Precision                  | 1 (day 7)                          | 2                          | JY_intermediate_precision_1_2 |
| JY cell line  | Precision                  | 1 (day 7)                          | 3                          | JY_intermediate_precision_1_3 |
| JY cell line  | Precision                  | 2 (day 7)                          | 1                          | JY_intermediate_precision_2_1 |
| JY cell line  | Precision                  | 2 (day 7)                          | 2                          | JY_intermediate_precision_2_2 |
| JY cell line  | Precision                  | 2 (day 7)                          | 3                          | JY_intermediate_precision_2_3 |
| JY cell line  | Precision                  | 3 (day 7)                          | 1                          | JY_intermediate_precision_3_1 |
| JY cell line  | Precision                  | 3 (day 7)                          | 2                          | JY_intermediate_precision_3_2 |
| JY cell line  | Precision                  | 3 (day 7)                          | 3                          | JY_intermediate_precision_3_3 |
| JY cell line  | LOD, specificity, accuracy | spiked 0.1 fmol synthetic peptides | 1                          | JY_100amol_1_1                |
| JY cell line  | LOD, specificity, accuracy | spiked 0.1 fmol synthetic peptides | 2                          | JY_100amol_1_2                |
| JY cell line  | LOD, specificity, accuracy | spiked 0.1 fmol synthetic peptides | 3                          | JY_100amol_1_3                |
| JY cell line  | LOD, specificity, accuracy | spiked 1 fmol synthetic peptides   | 1                          | JY_1fmol_1_1                  |
| JY cell line  | LOD, specificity, accuracy | spiked 1 fmol synthetic peptides   | 2                          | JY_1fmol_1_2                  |

| <b>Sample</b> | <b>Purpose</b>                          | <b>Condition/ number</b>           | <b>Technical replicate</b> | <b>Raw file name</b> |
|---------------|-----------------------------------------|------------------------------------|----------------------------|----------------------|
| JY cell line  | LOD, specificity, accuracy              | spiked 1 fmol synthetic peptides   | 3                          | JY_1fmol_1_3         |
| JY cell line  | LOD, specificity, accuracy              | spiked 10 fmol synthetic peptides  | 1                          | JY_10fmol_1_1        |
| JY cell line  | LOD, specificity, accuracy              | spiked 10 fmol synthetic peptides  | 2                          | JY_10fmol_1_2        |
| JY cell line  | LOD, specificity, accuracy              | spiked 10 fmol synthetic peptides  | 3                          | JY_10fmol_1_3        |
| JY cell line  | LOD, specificity, accuracy              | spiked 100 fmol synthetic peptides | 1                          | JY_100fmol_1_1       |
| JY cell line  | LOD, specificity, accuracy              | spiked 100 fmol synthetic peptides | 2                          | JY_100fmol_1_2       |
| JY cell line  | LOD, specificity, accuracy              | spiked 100 fmol synthetic peptides | 3                          | JY_100fmol_1_3       |
| PBMC          | Robustness                              | 1                                  | 1                          |                      |
| PBMC          | Robustness                              | 1                                  | 2                          |                      |
| PBMC          | Robustness                              | 1                                  | 3                          |                      |
| CLL           | Robustness                              | 1                                  | 1                          |                      |
| CLL           | Robustness                              | 1                                  | 2                          |                      |
| CLL           | Robustness                              | 1                                  | 3                          |                      |
| BC            | Robustness                              | 1                                  | 1                          |                      |
| BC            | Robustness                              | 1                                  | 2                          |                      |
| BC            | Robustness                              | 1                                  | 3                          |                      |
| JY cell line  | Precision, accuracy (LTQ Orbitrap XL)   | 1 (day 0)                          | 1                          |                      |
| JY cell line  | Precision, accuracy (LTQ Orbitrap XL)   | 1 (day 0)                          | 2                          |                      |
| JY cell line  | Precision, accuracy (LTQ Orbitrap XL)   | 1 (day 0)                          | 3                          |                      |
| JY cell line  | Specificity, accuracy (LTQ Orbitrap XL) | spiked 500 fmol synthetic peptides | 1                          |                      |
